# Supplementary material for: Sulfoquinovose metabolism in marine algae
Source: publisher site journal article supplement (doi:10.1515/bot-2020-0023), 2021-07-16
Supplement: Supplementary file 1 [file j_bot-2020-0023_suppl_001.docx]

**Supplementary material**

**Sulfoquinovose metabolism in marine algae**

Sabine Scholz (née Lehmann) et al.

DOI 10.1515/bot-2020-0023

**Supplementary Figure S1:** MALDI-TOF mass spectra showing the presence of (A) 2,3-dihydroxypropane-1-sulfonate and (B) taurine in extracts of the red alga *Plocamium cartilagineum*.
