# Supplementary material for: Sulfoquinovose metabolism in marine algae
Source: publisher site journal article supplement (doi:10.1515/bot-2020-0023), 2021-07-16
Supplement: Supplementary file 2 [file j_bot-2020-0023_suppl_004.xlsx]

## Sheet: Blast hits E. coli K12
Supplementary Table 3: GenBank accession numbers, annotations, protein sequence coverages, maximal identities, and BLAST scores of homologues of hypothetical genes involved in bacterial sulfoglycolysis of Escherichia coli-K12 (a) and Pseudomonas putida (b) in different species of algae surveyed here and other eukaryotes in general. (a) BLAST hits for the SQ degradation pathway from Escherichia co…
Query Name	Organism	Phylogenetic affinity	Hit	Hsp	Score	EValue	Alignment Length	% Hit Coverage	Hit Identity	% Hit Identity	Query Start	Query End	Hit Start	Hit End	Dataset
YihO_b3876_symporter_2_Ecoli_K12_1	Plasmodium falciparum 3D7		Plafal1|6454	232-288:68.0 10-89:58.0 124-171:54.0 328-364:49.0	229	6.04e-09	222	0.4051	56	0.2523	10	364	66	432	Plafal1_GeneCatalog_proteins_20180530.aa
YihO_b3876_symporter_2_Ecoli_K12_1	Trichomonas vaginalis G3		Trivag1|37532	326-397:83.0 122-173:68.0 187-211:42.0	193	3.1e-08	149	0.3725	44	0.2953	122	397	93	377	Trivag1_GeneCatalog_proteins_20180531.aa
YihO_b3876_symporter_2_Ecoli_K12_1	Symbiodinium microadriaticum CCMP2467		Symmic1|24239	10-78:101.0 348-406:78.0 123-164:58.0	237	3.09e-13	170	0.1923	57	0.3353	10	406	415	808	Symmic1_GeneCatalog_proteins_20180603.aa
YihO_b3876_symporter_2_Ecoli_K12_1	Pavlovales sp. CCMP2436 v1.0		Pavlov2436_1|996371	348-417:97.0 6-43:48.0 134-177:48.0 41-79:46.0	239	2.63e-09	191	0.1882	56	0.2932	6	417	106	592	Pavlov2436_1_GeneCatalog_proteins_20160817.aa
Query Name	Organism	Phylogenetic affinity	Hit	Hsp	Score	EValue	Alignment Length	% Hit Coverage	Hit Identity	% Hit Identity	Query Start	Query End	Hit Start	Hit End	Dataset
YihP_b3877_symporter_1_Ecoli_K12_1	Trichomonas vaginalis G3		Trivag1|55130	13-78:85.0 118-170:75.0 341-403:65.0	225	2.46e-12	182	0.3655	54	0.2967	13	403	14	410	Trivag1_GeneCatalog_proteins_20180531.aa
YihP_b3877_symporter_1_Ecoli_K12_1	Pavlovales sp. CCMP2436 v1.0		Pavlov2436_1|996371	354-411:90.0 9-46:48.0 124-174:46.0 189-236:46.0	230	4.41e-08	195	0.1921	56	0.2872	9	411	106	580	Pavlov2436_1_GeneCatalog_proteins_20160817.aa
YihP_b3877_symporter_1_Ecoli_K12_1	Symbiodinium microadriaticum CCMP2467		Symmic1|24239	13-81:87.0 354-404:68.0 126-167:55.0	210	1.62e-09	162	0.1833	54	0.3333	13	404	415	800	Symmic1_GeneCatalog_proteins_20180603.aa
Query Name	Organism	Phylogenetic affinity	Hit	Hsp	Score	EValue	Alignment Length	% Hit Coverage	Hit Identity	% Hit Identity	Query Start	Query End	Hit Start	Hit End	Dataset
YihQ_b3878_SQG-glucosidase_Ecoli_K12_1	Selaginella moellendorffii v1.0	Lycopodiopsida, Plantae	Selmo1|82321	115-342:346.0 516-609:223.0 443-511:162.0 342-391:113.0 390-419:97.0 424-443:63.0 635-674:59.0 606-631:53.0	1116	4.8e-113	557	0.9441	210	0.377	115	674	1	579	Selmo1_GeneModels_FilteredModels3_aa
YihQ_b3878_SQG-glucosidase_Ecoli_K12_1	Physcomitrella patens subsp patens v1.1	Bryophyta, Plantae	Phypa1_1|122818	516-609:202.0 235-338:198.0 450-511:146.0 394-443:138.0 115-160:120.0 343-400:98.0 637-666:62.0 606-631:59.0 173-215:58.0	1081	7.52e-104	513	0.8438	202	0.3938	115	666	5	588	proteins.FilterdModels3
YihQ_b3878_SQG-glucosidase_Ecoli_K12_1	Oxytricha trifallax JRB310	Spirotrichea, Ciliophora	Oxytri1|3171128	235-340:275.0 81-218:145.0 533-610:131.0 449-511:129.0 401-449:127.0 339-398:121.0 612-641:68.0 513-531:50.0 646-669:47.0	1093	2.31e-105	567	0.8229	212	0.3739	81	669	55	661	Oxytri1_GeneCatalog_proteins_20191115.aa
YihQ_b3878_SQG-glucosidase_Ecoli_K12_1	Aureococcus anophagefferens clone 1984	Pelagophyceae, Ochrophyta, Stramenopila	jgi|Auran1|10333	533-621:165.0 233-325:159.0 448-511:105.0 396-447:103.0 342-395:97.0 120-164:86.0 511-531:46.0	761	2.31e-64	418	0.7712	150	0.3589	120	621	1	521	Aureococcus_anophagefferens.proteinsFM3
YihQ_b3878_SQG-glucosidase_Ecoli_K12_1	Bigelowiella natans CCMP2755	Chlorarachniophyceae, Cercozoa	Bigna1|28767	119-217:148.0 448-509:145.0 253-308:127.0 556-639:119.0 401-423:73.0 370-390:69.0 301-322:60.0 516-534:57.0 641-662:54.0 423-448:52.0 238-252:51.0 339-364:50.0	1005	1.99e-81	475	0.7711	187	0.3937	119	662	6	616	Bigna1_filtered_proteins
YihQ_b3878_SQG-glucosidase_Ecoli_K12_1	Ostreococcus lucimarinus	Mamiellophyceae, Chlorophyta	Ost9901_3|956	373-530:342.0 533-631:183.0 235-304:159.0 115-160:106.0 300-338:72.0 642-663:50.0 631-640:42.0	954	1.34e-90	444	0.7695	183	0.4122	115	663	4	575	Olucimarinus_FM_aa
YihQ_b3878_SQG-glucosidase_Ecoli_K12_1	Thalassiosira pseudonana CCMP 1335	Bacillariophyceae, Stramenopila	Thaps3|37127	185-294:130.0 414-482:100.0 586-641:100.0 645-676:75.0 516-540:71.0 373-396:60.0 301-338:47.0	583	6.69e-41	354	0.6996	116	0.3277	185	676	1	506	Thaps3_geneModels_FilteredModels2_aa
YihQ_b3878_SQG-glucosidase_Ecoli_K12_1	Schizochytrium aggregatum ATCC 28209	Labyrinthulomycetes, Stramenopila	Schag1|36561	244-314:184.0 451-520:124.0 115-157:123.0 369-413:92.0 577-615:69.0 426-442:59.0 323-360:58.0 551-568:52.0 516-530:50.0 646-665:44.0 533-542:43.0	898	1.03e-65	386	0.6553	171	0.443	115	665	1	568	Schag1_GeneCatalog_proteins_20121220.aa
YihQ_b3878_SQG-glucosidase_Ecoli_K12_1	Thalassiosira oceanica CCMP1005	Bacillariophyceae, Stramenopila	Thaoce1|73387	607-642:90.0 516-550:74.0 550-604:71.0 640-663:48.0	283	1.98e-17	150	0.6438	54	0.36	516	663	30	195	Thaoce1_GeneCatalog_proteins_20171026.aa
YihQ_b3878_SQG-glucosidase_Ecoli_K12_1	Phaeocystis antarctica CCMP1374 v2.2	Prymnesiophyceae, Haptophyta	Phaant1|34627	416-509:180.0 535-597:94.0 606-642:82.0 401-413:59.0 641-664:58.0 511-530:56.0	529	3.94e-42	251	0.6419	107	0.4263	401	664	18	351	Phaant1_GeneCatalog_proteins_20181014.aa
YihQ_b3878_SQG-glucosidase_Ecoli_K12_1	Aurantiochytrium limacinum ATCC MYA-1381	Thraustochytriales, Stramenopila	Aurli1|55283	244-340:247.0 582-642:137.0 451-509:119.0 116-160:103.0 369-386:52.0 425-453:50.0 648-663:49.0 398-424:42.0	799	7.62e-65	352	0.6122	146	0.4148	116	663	1	575	Aurli1_GeneCatalog_proteins_20120618.aa
YihQ_b3878_SQG-glucosidase_Ecoli_K12_1	Populus trichocarpa v1.1	Magnoliophyta, Plantae	eugene3.00060348	173-339:258.0 516-609:221.0 390-443:134.0 450-508:134.0 115-160:115.0 342-392:102.0 606-632:67.0 645-666:64.0 634-645:43.0	1138	1.68e-111	532	0.608	209	0.3929	115	666	282	859	AllJamboreeModels.named_proteins
YihQ_b3878_SQG-glucosidase_Ecoli_K12_1	Phytophthora capsici LT1534 v11.0	Oomycota, Stramenopila	Phyca11|35263	239-295:161.0 420-509:161.0 373-413:100.0 115-165:95.0 535-598:82.0 646-663:55.0 301-314:42.0 637-647:41.0	737	1.46e-56	346	0.5786	141	0.4075	115	663	3	598	Phyca11_filtered_proteins
YihQ_b3878_SQG-glucosidase_Ecoli_K12_1	Nannochloropsis oceanica CCMP1779 v2.0	Eustigmatophyceae, Ochrophyta	Nanoce1779_2|667381	240-327:180.0 551-631:163.0 341-396:128.0 114-160:112.0 449-511:111.0 645-675:82.0 396-419:76.0 419-446:70.0 511-534:58.0 327-338:46.0 635-647:46.0	1072	3.82e-87	467	0.5566	194	0.4154	114	675	230	836	Nanoce1779_2_GeneCatalog_proteins_20180119
YihQ_b3878_SQG-glucosidase_Ecoli_K12_1	Nannochloropsis gaditana B-31	Eustigmatophyceae, Ochrophyta	Nangad1|4443	551-631:207.0 239-318:154.0 331-396:132.0 633-676:125.0 449-511:121.0 114-160:111.0 398-419:91.0 418-445:63.0 516-534:47.0	1051	3.42e-93	450	0.5383	199	0.4422	114	676	210	793	Nangad1_GeneCatalog_proteins_20180307.aa
YihQ_b3878_SQG-glucosidase_Ecoli_K12_1	Aplanochytrium kerguelense PBS07 v1.0	Labyrinthulomycetes, Stramenopila	Aplke1|30585	244-340:255.0 450-511:127.0 126-160:103.0 595-644:103.0 583-602:65.0 516-534:53.0 369-390:49.0	755	1.9e-63	305	0.5241	128	0.4197	126	644	2	545	Aplke1_GeneCatalog_proteins_20121220.aa
YihQ_b3878_SQG-glucosidase_Ecoli_K12_1	Micromonas commoda NOUM17 (RCC 299)	Mamiellophyceae, Chlorophyta	MicpuN3v2|6005	373-445:196.0 448-531:177.0 533-631:170.0 111-160:129.0 256-304:104.0 300-338:76.0 173-211:55.0 236-256:51.0 344-363:42.0	1000	2.81e-93	474	0.5147	187	0.3945	111	631	281	819	MicpuN3v2_GeneCatalog_proteins_20131216.aa
YihQ_b3878_SQG-glucosidase_Ecoli_K12_1	Sorghum bicolor	Magnoliophyta, Plantae	Sorbi1|5035547	173-336:258.0 342-443:240.0 523-609:123.0 115-160:106.0 606-631:65.0 635-647:42.0	834	1.46e-77	438	0.5141	159	0.363	115	647	315	812	Sorbi1_GeneModels_Sbi1_4_aa
YihQ_b3878_SQG-glucosidase_Ecoli_K12_1	Phaeocystis globosa Pg-G v2.3	Prymnesiophyceae, Haptophyta	Phaglo1|5789	416-509:180.0 535-594:96.0 606-642:79.0 401-413:59.0 505-530:54.0 641-664:54.0 363-390:51.0	573	5.91e-44	282	0.5137	113	0.4007	363	664	130	509	Phaglo1_GeneCatalog_proteins_20181013.aa
YihQ_b3878_SQG-glucosidase_Ecoli_K12_1	Micromonas pusilla CCMP1545	Mamiellophyceae, Chlorophyta	MicpuC3v2|7328	373-445:180.0 533-631:176.0 445-534:171.0 255-304:125.0 115-160:120.0 300-338:82.0 649-666:57.0 173-211:54.0 344-363:42.0	1007	8.1e-87	474	0.5113	192	0.4051	115	666	306	885	MicpuC3v2_GeneCatalog_proteins_20131216.aa
YihQ_b3878_SQG-glucosidase_Ecoli_K12_1	Ochromonadaceae sp. CCMP2298 v1.0		Ochro2298_1|445970	115-265:222.0 396-443:150.0 280-337:143.0 551-618:123.0 449-509:120.0 361-395:67.0 642-666:65.0 634-648:57.0 516-530:56.0	1003	4.89e-86	476	0.4902	186	0.3908	115	666	156	872	Ochro2298_1_GeneCatalog_proteins_20160817.aa
YihQ_b3878_SQG-glucosidase_Ecoli_K12_1	Ostreococcus tauri RCC1115 v1.0		Ostta1115_2|205225	373-530:339.0 229-304:179.0 535-631:177.0 115-160:98.0 300-338:73.0 645-674:52.0	918	2.47e-89	446	0.4806	185	0.4148	115	674	313	895	Ostta1115_2_GeneCatalog_proteins_20170131.aa
YihQ_b3878_SQG-glucosidase_Ecoli_K12_1	Ostreococcus tauri RCC4221 v3.0		Ostta4221_3|76186	373-530:339.0 229-304:179.0 535-631:177.0 115-160:98.0 300-338:73.0 645-674:52.0	918	2.55e-89	446	0.4775	185	0.4148	115	674	319	901	Ostta4221_3_GeneCatalog_proteins_20161028.aa
YihQ_b3878_SQG-glucosidase_Ecoli_K12_1	Ostreococcus sp. RCC809		OstRCC809_2|94920	373-531:339.0 533-631:171.0 229-304:161.0 115-160:99.0 300-338:76.0 642-671:51.0	897	1.68e-86	449	0.4766	179	0.3987	115	671	327	906	OstRCC809FM3proteins
YihQ_b3878_SQG-glucosidase_Ecoli_K12_1	Phytophthora infestans T30-4		Phyinf1|9598	239-295:163.0 373-413:104.0 117-160:92.0 535-598:92.0 473-511:70.0 301-314:42.0 514-531:42.0	605	3.24e-43	277	0.4571	116	0.4188	117	598	68	575	Phyinf1_GeneCatalog_proteins_20180122.aa
YihQ_b3878_SQG-glucosidase_Ecoli_K12_1	Reticulomyxa filosa		Retfil1|22421	133-209:114.0 299-340:109.0 463-511:105.0 236-264:72.0 363-395:72.0 401-421:70.0 533-571:68.0 516-531:56.0 281-292:48.0 415-442:43.0	757	1.6e-56	346	0.4535	143	0.4133	133	571	197	656	Retfil1_GeneCatalog_proteins_20180531.aa
YihQ_b3878_SQG-glucosidase_Ecoli_K12_1	Phytophthora cinnamomi var cinnamomi v1.0		Phyci1|94061	420-509:173.0 239-295:149.0 373-413:101.0 89-165:99.0 535-598:75.0 646-663:55.0 301-314:45.0	697	1.22e-54	361	0.4473	139	0.385	89	663	129	779	Phyci1_GeneCatalog_proteins_20120612.aa
YihQ_b3878_SQG-glucosidase_Ecoli_K12_1	Bathycoccus prasinos RCC1105		Batpra1|599	402-531:243.0 535-634:189.0 235-304:141.0 112-160:104.0 300-343:87.0 171-208:53.0	817	1.85e-75	431	0.4425	163	0.3782	112	634	359	880	Batpra1_GeneCatalog_proteins_20180426.aa
YihQ_b3878_SQG-glucosidase_Ecoli_K12_1	Phytophthora sojae v3.0		Physo3|531884	239-295:164.0 373-413:101.0 117-160:93.0 533-571:79.0 473-511:65.0 646-663:48.0 607-631:45.0 637-648:44.0 301-314:42.0	681	7.31e-44	289	0.3682	124	0.4291	117	663	167	757	Physo3_GeneCatalog_proteins_20110401.aa
YihQ_b3878_SQG-glucosidase_Ecoli_K12_1	Picochlorum sp. SENEW3		Picsp_1|6834	548-647:121.0 461-535:68.0 375-408:67.0 311-353:50.0	306	4.17e-17	252	0.3007	70	0.2778	311	647	459	812	Picsp_1_GeneCatalog_proteins_20170909.aa
YihQ_b3878_SQG-glucosidase_Ecoli_K12_1	Cryptophyceae sp. CCMP2293 v1.0		Crypto2293_1|1868208	570-610:77.0 519-537:63.0	140	1.58e-06	60	0.2985	25	0.4167	519	610	110	201	Crypto2293_1_GeneCatalog_proteins_20160903.aa
YihQ_b3878_SQG-glucosidase_Ecoli_K12_1	Coccomyxa sp. C-169		Coc_C169_1|64142	585-639:94.0 375-412:75.0 471-535:67.0 307-364:48.0	284	3.38e-14	216	0.2703	59	0.2731	307	639	429	757	Coccomyxa_C169_v2_filtered_proteins
YihQ_b3878_SQG-glucosidase_Ecoli_K12_1	Galdieria sulphuraria 074W		Galsul1|5201	585-637:95.0 519-571:64.0 308-343:59.0 30-61:49.0 425-477:49.0 647-663:46.0	362	3.2e-15	244	0.2582	73	0.2992	30	663	325	828	Galsul1_GeneCatalog_proteins_20180411.aa
YihQ_b3878_SQG-glucosidase_Ecoli_K12_1	Emiliania huxleyi CCMP1516 v1.0		Emihu1|461465	568-639:76.0 367-415:67.0 519-543:48.0 308-341:46.0 127-148:42.0	279	1.69e-08	202	0.2191	62	0.3069	127	639	154	767	Emihu1_reduced_proteins
YihQ_b3878_SQG-glucosidase_Ecoli_K12_1	Monoraphidium neglectum SAG 48.87		Monneg1|3076	568-601:74.0 346-409:64.0 606-632:58.0 646-674:45.0	241	2.28e-08	154	0.1719	52	0.3377	346	674	447	785	Monneg1_GeneCatalog_proteins_20170920.aa
YihQ_b3878_SQG-glucosidase_Ecoli_K12_1	Chromochloris zofingiensis SAG 211-14		Chrzof1|78	567-633:87.0 519-537:49.0 340-363:46.0 375-388:42.0	224	2.52e-06	124	0.1664	43	0.3468	340	633	251	553	Chrzof1_GeneCatalog_proteins_20190731.aa
YihQ_b3878_SQG-glucosidase_Ecoli_K12_1	Phaeodactylum tricornutum CCAP 1055/1 v2.0		Phatr2|50836	582-634:99.0 519-537:45.0 308-343:43.0 468-477:41.0	228	4.42e-07	118	0.1657	39	0.3305	308	634	216	550	Phatr2_geneModels_FilteredModels2_aa
YihQ_b3878_SQG-glucosidase_Ecoli_K12_1	Ectocarpus siliculosus Ec 32		Ectsil1|26383	568-606:68.0 517-537:57.0 614-633:41.0	166	4.44e-06	80	0.1536	31	0.3875	517	633	274	413	Ectsil1_GeneCatalog_proteins_20171109.aa
YihQ_b3878_SQG-glucosidase_Ecoli_K12_1	Arabidopsis lyrata		Araly1|919683	567-631:99.0 344-363:55.0 519-537:50.0 308-341:43.0	247	8.51e-09	138	0.1498	47	0.3406	308	631	411	740	Araly1_GeneModels_FilteredModels6_aa
YihQ_b3878_SQG-glucosidase_Ecoli_K12_1	Saprolegnia parasitica CBS 223.65		Sappar1|20986	544-642:128.0 512-537:52.0 646-663:41.0	221	2.52e-13	143	0.1403	50	0.3497	512	663	681	834	Sappar1_GeneCatalog_proteins_20180131.aa
YihQ_b3878_SQG-glucosidase_Ecoli_K12_1	Tetrahymena thermophila SB210		Tetthe1|3313937	581-635:92.0 306-343:53.0 512-537:51.0	196	8.01e-07	119	0.139	36	0.3025	306	635	347	692	Tetthe1_GeneCatalog_proteins_20191114.aa
YihQ_b3878_SQG-glucosidase_Ecoli_K12_1	Scenedesmus obliquus EN0004 v1.0		SceoblEN4_1|574354	568-639:69.0 506-537:53.0 466-477:41.0	163	8.15e-06	116	0.1365	36	0.3103	466	639	465	644	SceoblEN4_1_GeneCatalog_proteins_20190921.aa
YihQ_b3878_SQG-glucosidase_Ecoli_K12_1	Symbiochloris reticulata Spain extracted metagenome v1.0		SymretSp1|730215	568-641:139.0 512-543:57.0	196	2.43e-14	106	0.1359	42	0.3962	512	641	589	718	SymretSp1_GeneCatalog_proteins_20171013.aa
YihQ_b3878_SQG-glucosidase_Ecoli_K12_1	Symbiochloris reticulata Spain reference genome v1.0		Dicre1|741998	568-641:139.0 512-543:57.0	196	2.39e-14	106	0.1359	42	0.3962	512	641	589	718	Dicre1_GeneCatalog_proteins_20171101.aa
YihQ_b3878_SQG-glucosidase_Ecoli_K12_1	Symbiochloris reticulata Scotland extracted metagenome v1.0		SymretSc1|244103	568-641:139.0 512-543:57.0	196	2.49e-14	106	0.1333	42	0.3962	512	641	604	733	SymretSc1_GeneCatalog_proteins_20180314.aa
YihQ_b3878_SQG-glucosidase_Ecoli_K12_1	Chrysochromulina tobin CCMP291		Chrsp_1|172151	519-631:136.0 648-666:42.0	178	1.18e-11	132	0.1315	42	0.3182	519	666	710	861	Chrsp_1_GeneCatalog_proteins_20180813.aa
YihQ_b3878_SQG-glucosidase_Ecoli_K12_1	Fragilariopsis cylindrus CCMP 1102		Fracy1|180330	553-634:109.0 519-537:47.0	156	1.05e-08	101	0.13	32	0.3168	519	634	481	596	Fracy1_GeneModels_FilteredModels2_aa
YihQ_b3878_SQG-glucosidase_Ecoli_K12_1	Trypanosoma brucei brucei TREU927		Trybru1|3776	567-631:101.0 505-537:64.0	165	3.88e-10	98	0.1214	32	0.3265	505	631	504	630	Trybru1_GeneCatalog_proteins_20180531.aa
YihQ_b3878_SQG-glucosidase_Ecoli_K12_1	Asterochloris sp. Cgr/DA1pho v2.0		Astpho2|6591	582-631:101.0 410-446:54.0 519-537:49.0	204	2.1e-08	106	0.1176	40	0.3774	410	631	503	722	Astpho2_GeneCatalog_proteins_20111209.aa
YihQ_b3878_SQG-glucosidase_Ecoli_K12_1	Naegleria gruberi v1.0		Naegr1|83164	567-647:147.0 518-537:56.0	203	4.78e-15	101	0.1125	41	0.4059	518	647	595	724	Naegr1_best_proteins
YihQ_b3878_SQG-glucosidase_Ecoli_K12_1	Scenedesmus obliquus UTEX 393		Sobl393_1|1960	568-639:99.0 512-552:53.0 469-478:42.0	194	9.02e-10	123	0.1124	42	0.3415	469	639	643	805	Sobl393_1_GeneCatalog_proteins_20200120.aa
YihQ_b3878_SQG-glucosidase_Ecoli_K12_1	Chondrus crispus Stackhouse		Chocri1|6095	585-633:105.0 286-324:52.0 519-537:51.0	208	5.7e-09	107	0.1078	41	0.3832	286	633	541	819	Chocri1_GeneCatalog_proteins_20180417.aa
YihQ_b3878_SQG-glucosidase_Ecoli_K12_1	Symbiochloris reticulata Africa extracted metagenome v1.0		SymretAf1|547584	583-632:104.0 519-537:53.0 634-655:42.0	199	9.51e-08	91	0.1026	38	0.4176	519	655	578	715	SymretAf1_GeneCatalog_proteins_20180322.aa
YihQ_b3878_SQG-glucosidase_Ecoli_K12_1	Pelagophyceae sp. CCMP2097 v1.0		Pelago2097_1|550762	568-631:144.0 519-537:57.0 650-666:47.0	248	5.92e-17	100	0.1025	50	0.5	519	666	678	831	Pelago2097_1_GeneCatalog_proteins_20160408.aa
YihQ_b3878_SQG-glucosidase_Ecoli_K12_1	Symbiochloris reticulata Switzerland extracted metagenome v1.0		SymretSw1|324623	583-632:104.0 519-537:53.0 634-655:42.0	199	1e-07	91	0.0999	38	0.4176	519	655	602	739	SymretSw1_GeneCatalog_proteins_20180321.aa
YihQ_b3878_SQG-glucosidase_Ecoli_K12_1	Guillardia theta CCMP2712		Guith1|159678	570-633:108.0 519-537:57.0	165	8.69e-10	83	0.0985	32	0.3855	519	633	527	641	Guith1_GeneCatalog_proteins_20101209.aa
YihQ_b3878_SQG-glucosidase_Ecoli_K12_1	Volvox carteri nagariensis		Volca1|60238	567-631:96.0 519-537:42.0	138	3.26e-06	84	0.0935	27	0.3214	519	631	603	715	proteins
YihQ_b3878_SQG-glucosidase_Ecoli_K12_1	Cyanidioschyzon merolae strain 10D		Cyamer1|57358	576-631:89.0 519-537:46.0	135	2.35e-06	75	0.0773	30	0.4	519	631	682	792	Cyamer1_GeneCatalog_proteins_20180616.aa
YihQ_b3878_SQG-glucosidase_Ecoli_K12_1	Auxenochlorella protothecoides 0710		Auxeprot1|416	582-633:100.0 519-537:56.0	156	2.08e-07	71	0.07	30	0.4225	519	633	578	814	Auxeprot1_GeneCatalog_proteins_20170909.aa
YihQ_b3878_SQG-glucosidase_Ecoli_K12_1	Chlorella sp. NC64A		ChlNC64A_1|57649	568-603:76.0 606-639:67.0 519-537:46.0	189	2.18e-09	89	0.0638	34	0.382	519	639	674	798	Chlorella_NC64A_filtered_proteins
Query Name	Organism	Phylogenetic affinity	Hit	Hsp	Score	EValue	Alignment Length	% Hit Coverage	Hit Identity	% Hit Identity	Query Start	Query End	Hit Start	Hit End	Dataset
YihR_b3879_SQ-epimerase_Ecoli_K12_1	Bigelowiella natans CCMP2755		Bigna1|131855	64-91:68.0 111-145:48.0 268-295:44.0 161-171:43.0	203	8.85e-06	102	0.2656	37	0.3627	64	295	128	371	Bigna1_filtered_proteins
YihR_b3879_SQ-epimerase_Ecoli_K12_1	Chrysochromulina tobin CCMP291		Chrsp_1|170358	62-94:87.0 129-171:57.0 270-295:52.0	196	6.5e-09	102	0.2642	40	0.3922	62	295	88	375	Chrsp_1_GeneCatalog_proteins_20180813.aa
YihR_b3879_SQ-epimerase_Ecoli_K12_1	Reticulomyxa filosa		Retfil1|28927	67-111:122.0 263-295:66.0	188	3.28e-12	78	0.1889	36	0.4615	67	295	137	402	Retfil1_GeneCatalog_proteins_20180531.aa
Query Name	Organism	Phylogenetic affinity	Hit	Hsp	Score	EValue	Alignment Length	% Hit Coverage	Hit Identity	% Hit Identity	Query Start	Query End	Hit Start	Hit End	Dataset
YihS_b3880_SQ-isomerase_Ecoli_K12_1	Chrysochromulina tobin CCMP291	Coccolithophyceae, Haptophyta	Chrsp_1|177358	142-260:184.0 316-361:75.0 67-127:50.0 269-290:44.0	353	2.99e-27	248	0.5905	74	0.2984	67	361	95	382	Chrsp_1_GeneCatalog_proteins_20180813.aa
YihS_b3880_SQ-isomerase_Ecoli_K12_1	Ochromonadaceae sp. CCMP2298 v1.0	Synurophyceae, Ochrophyta, Stramenopila	Ochro2298_1|321103	103-260:255.0 316-369:131.0 269-290:56.0	442	1.15e-43	234	0.5865	82	0.3504	103	369	112	371	Ochro2298_1_GeneCatalog_proteins_20160817.aa
YihS_b3880_SQ-isomerase_Ecoli_K12_1	Aureococcus anophagefferens clone 1984		jgi|Auran1|33301	293-368:126.0 166-236:120.0 239-257:62.0 270-290:44.0	352	3.18e-27	187	0.4442	65	0.3476	166	368	192	388	Aureococcus_anophagefferens.proteinsFM3
YihS_b3880_SQ-isomerase_Ecoli_K12_1	Symbiodinium microadriaticum CCMP2467		Symmic1|4155	105-260:215.0 297-360:109.0	324	2.76e-31	220	0.2895	70	0.3182	105	360	473	721	Symmic1_GeneCatalog_proteins_20180603.aa
Query Name	Organism	Phylogenetic affinity	Hit	Hsp	Score	EValue	Alignment Length	% Hit Coverage	Hit Identity	% Hit Identity	Query Start	Query End	Hit Start	Hit End	Dataset
YihU_b3882_SLA-reductase_Ecoli_K12_1	Pavlovales sp. CCMP2436 v1.0	Pavlovophyceae, Haptophyceae	Pavlov2436_1|1107503	1-76:95.0 208-283:83.0 78-121:67.0 149-212:59.0	304	8.05e-21	260	0.8784	74	0.2846	1	283	1	283	Pavlov2436_1_GeneCatalog_proteins_20160817.aa
YihU_b3882_SLA-reductase_Ecoli_K12_1	Phaeocystis antarctica CCMP1374 v2.2	Prymnesiophyceae, Haptophyta	Phaant1|7641	4-121:138.0 223-283:91.0 142-212:84.0	313	7.67e-26	250	0.8418	74	0.296	4	283	5	283	Phaant1_GeneCatalog_proteins_20181014.aa
YihU_b3882_SLA-reductase_Ecoli_K12_1	Scenedesmus obliquus UTEX 393	Chlorophyceae, Chlorophyta	Sobl393_1|12734	231-289:109.0 29-121:84.0 4-36:58.0 153-221:52.0	303	1.34e-20	254	0.8301	75	0.2953	4	289	15	301	Sobl393_1_GeneCatalog_proteins_20200120.aa
YihU_b3882_SLA-reductase_Ecoli_K12_1	Toxoplasma gondii ME49	Conoidasida, Apicomplexa	Toxgon1|6199	4-121:144.0 209-282:88.0 148-212:70.0	302	1.26e-24	257	0.8031	74	0.2879	4	282	29	306	Toxgon1_GeneCatalog_proteins_20180601.aa
YihU_b3882_SLA-reductase_Ecoli_K12_1	Guillardia theta CCMP2712	Cryptophyta, Stramenopila	Guith1|152397	16-121:145.0 233-284:97.0 144-210:76.0	318	1.25e-26	225	0.7979	77	0.3422	16	284	1	275	Guith1_GeneCatalog_proteins_20101209.aa
YihU_b3882_SLA-reductase_Ecoli_K12_1	Asterochloris sp. Cgr/DA1pho v2.0	Trebouxiophyceae, Chlorophyta	Astpho2|9194	4-121:117.0 232-286:86.0 142-197:61.0	264	1.07e-19	229	0.7897	61	0.2664	4	286	11	275	Astpho2_GeneCatalog_proteins_20111209.aa
YihU_b3882_SLA-reductase_Ecoli_K12_1	Ostreococcus sp. RCC809	Mamiellophyceae, Chlorophyta	OstRCC809_2|56948	226-287:109.0 4-44:98.0 146-221:61.0 79-121:46.0	314	1.8e-22	222	0.7845	70	0.3153	4	287	3	282	OstRCC809FM3proteins
YihU_b3882_SLA-reductase_Ecoli_K12_1	Phytophthora capsici LT1534 v11.0	Oomycota, Stramenopila	Phyca11|507574	4-121:216.0 222-287:96.0 142-206:87.0	399	7.48e-38	249	0.7781	93	0.3735	4	287	28	317	Phyca11_filtered_proteins
YihU_b3882_SLA-reductase_Ecoli_K12_1	Trypanosoma brucei brucei TREU927	Kinetoplastea, Euglenozoa	Trybru1|7452	4-99:144.0 221-283:103.0 142-211:69.0	316	1.84e-25	229	0.7633	75	0.3275	4	283	5	284	Trybru1_GeneCatalog_proteins_20180531.aa
YihU_b3882_SLA-reductase_Ecoli_K12_1	Ostreococcus lucimarinus	Mamiellophyceae, Chlorophyta	Ost9901_3|45774	226-287:115.0 4-44:92.0 151-222:63.0 83-121:51.0	321	2e-23	214	0.7562	72	0.3364	4	287	3	282	Olucimarinus_FM_aa
YihU_b3882_SLA-reductase_Ecoli_K12_1	Gonium pectorale NIES-2863	Chlorophyceae, Chlorophyta	Gonpec1|2687	224-284:125.0 64-121:80.0 3-24:64.0 142-221:54.0	323	7.43e-22	221	0.7466	71	0.3213	3	284	8	290	Gonpec1_GeneCatalog_proteins_20180501.aa
YihU_b3882_SLA-reductase_Ecoli_K12_1	Chlorella sp. NC64A	Trebouxiophyceae, Chlorophyta	ChlNC64A_1|133685	224-286:117.0 4-121:114.0 145-206:64.0	295	7.15e-24	243	0.7386	69	0.284	4	286	15	319	Chlorella_NC64A_filtered_proteins
YihU_b3882_SLA-reductase_Ecoli_K12_1	Dunaliella salina CCAP19-18	Chlorophyceae, Chlorophyta	Dunsal1|9630	29-121:91.0 232-286:88.0 145-197:56.0	235	1.44e-15	201	0.7309	57	0.2836	29	286	16	272	Dunsal1_GeneCatalog_proteins_20180508.aa
YihU_b3882_SLA-reductase_Ecoli_K12_1	Phytophthora sojae v3.0	Oomycota, Stramenopila	Physo3|284006	61-121:132.0 222-287:105.0 4-44:88.0 142-206:83.0	408	1.42e-34	233	0.7259	90	0.3863	4	287	28	318	Physo3_GeneCatalog_proteins_20110401.aa
YihU_b3882_SLA-reductase_Ecoli_K12_1	Scenedesmus obliquus EN0004 v1.0	Chlorophyceae, Chlorophyta	SceoblEN4_1|573048	231-289:109.0 64-121:82.0 4-36:58.0 153-221:52.0	301	2e-20	219	0.7157	70	0.3196	4	289	15	301	SceoblEN4_1_GeneCatalog_proteins_20190921.aa
YihU_b3882_SLA-reductase_Ecoli_K12_1	Phytophthora cinnamomi var cinnamomi v1.0	Oomycota, Stramenopila	Phyci1|213040	61-121:135.0 226-287:104.0 4-44:88.0 142-206:84.0	411	5.04e-35	229	0.7134	90	0.393	4	287	28	318	Phyci1_GeneCatalog_proteins_20120612.aa
YihU_b3882_SLA-reductase_Ecoli_K12_1	Volvox carteri nagariensis	Chlorophyceae, Chlorophyta	Volca1|65267	224-284:111.0 64-121:70.0 4-24:63.0 154-221:45.0	289	2.5e-17	208	0.7051	63	0.3029	4	284	9	290	proteins
YihU_b3882_SLA-reductase_Ecoli_K12_1	Aplanochytrium kerguelense PBS07 v1.0	Labyrinthulomycetes, Stramenopila	Aplke1|51671	240-280:85.0 26-81:77.0 4-25:71.0 145-211:63.0 83-121:54.0	350	3.92e-23	225	0.6988	81	0.36	4	280	26	311	Aplke1_GeneCatalog_proteins_20121220.aa
YihU_b3882_SLA-reductase_Ecoli_K12_1	Phaeocystis globosa Pg-G v2.3	Prymnesiophyceae, Haptophyta	Phaglo1|15007	4-121:130.0 223-283:91.0 162-178:41.0	262	8.18e-18	196	0.695	62	0.3163	4	283	5	268	Phaglo1_PrimaryTranscript_proteins_20181013.aa
YihU_b3882_SLA-reductase_Ecoli_K12_1	Chondrus crispus Stackhouse	Florideophyceae, Rhodophyta	Chocri1|6829	4-121:138.0 219-283:113.0 144-174:48.0	299	2.94e-23	214	0.6948	68	0.3178	4	283	10	288	Chocri1_GeneCatalog_proteins_20180417.aa
YihU_b3882_SLA-reductase_Ecoli_K12_1	Aureococcus anophagefferens clone 1984	Pelagophyceae, Ochrophyta, Stramenopila	jgi|Auran1|26953	61-121:111.0 144-211:74.0 228-287:74.0 4-20:51.0	310	1.17e-21	206	0.6913	72	0.3495	4	287	6	296	Aureococcus_anophagefferens.proteinsFM3
YihU_b3882_SLA-reductase_Ecoli_K12_1	Nannochloropsis gaditana B-31	Eustigmatophyceae, Ochrophyta	Nangad1|695	223-283:101.0 71-121:92.0 144-224:67.0 4-31:60.0	320	3.97e-23	221	0.6906	70	0.3167	4	283	16	294	Nangad1_GeneCatalog_proteins_20180307.aa
YihU_b3882_SLA-reductase_Ecoli_K12_1	Chrysochromulina tobin CCMP291	Coccolithophyceae, Haptophyta	Chrsp_1|179822	4-74:136.0 229-292:124.0 164-209:57.0 78-121:44.0	361	8.45e-27	225	0.6881	74	0.3289	4	292	15	311	Chrsp_1_GeneCatalog_proteins_20180813.aa
YihU_b3882_SLA-reductase_Ecoli_K12_1	Populus trichocarpa v1.1	Magnoliophyta, Plantae	grail3.1345000101	223-288:95.0 4-33:88.0 86-121:65.0 36-81:61.0 142-174:46.0	355	6.84e-22	211	0.6873	78	0.3697	4	288	7	296	AllJamboreeModels.named_proteins
YihU_b3882_SLA-reductase_Ecoli_K12_1	Ostreococcus tauri RCC1115 v1.0	Magnoliophyta, Plantae	Ostta1115_2|204301	224-287:116.0 4-44:89.0 146-224:66.0 83-121:44.0	315	1.49e-22	223	0.6862	71	0.3184	4	287	45	324	Ostta1115_2_GeneCatalog_proteins_20170131.aa
YihU_b3882_SLA-reductase_Ecoli_K12_1	Ostreococcus tauri RCC4221 v3.0	Mamiellophyceae, Chlorophyta	Ostta4221_3|74354	224-287:116.0 4-44:89.0 146-224:66.0 83-121:44.0	315	1.48e-22	223	0.6862	71	0.3184	4	287	45	324	Ostta4221_3_GeneCatalog_proteins_20161028.aa
YihU_b3882_SLA-reductase_Ecoli_K12_1	Oxytricha trifallax JRB310	Spirotrichea, Ciliophora	Oxytri1|3192704	4-121:176.0 142-175:72.0 222-286:70.0	318	3.84e-25	217	0.6845	64	0.2949	4	286	23	311	Oxytri1_GeneCatalog_proteins_20191115.aa
YihU_b3882_SLA-reductase_Ecoli_K12_1	Paramecium tetraurelia d4_2	Ciliophora, Oligohymenophorea	Partet1|4786684	223-283:90.0 59-121:76.0 4-44:74.0 144-174:52.0	292	1.86e-17	196	0.6712	57	0.2908	4	283	3	280	Partet1_GeneCatalog_proteins_20191116.aa
YihU_b3882_SLA-reductase_Ecoli_K12_1	Saprolegnia parasitica CBS 223.65	Oomycota, Stramenopila	Sappar1|32974	61-121:105.0 226-284:91.0 145-207:81.0 4-32:80.0	357	8.86e-28	212	0.6667	82	0.3868	4	284	25	312	Sappar1_GeneCatalog_proteins_20180131.aa
YihU_b3882_SLA-reductase_Ecoli_K12_1	Chlamydomonas reinhardtii v4.0	Chlorophyceae, Chlorophyta	Chlre4|413588	4-121:123.0 230-294:109.0 151-221:52.0	284	4.03e-22	254	0.658	73	0.2874	4	294	88	377	Chlre4_best_proteins
YihU_b3882_SLA-reductase_Ecoli_K12_1	Phytophthora infestans T30-4	Oomycota, Stramenopila	Phyinf1|814	4-121:199.0 222-287:101.0 142-206:84.0	384	1.02e-35	249	0.6553	90	0.3614	4	287	31	320	Phyinf1_GeneCatalog_proteins_20180122.aa
YihU_b3882_SLA-reductase_Ecoli_K12_1	Auxenochlorella protothecoides 0710	Trebouxiophyceae, Chlorophyta	Auxeprot1|5133	4-44:81.0 226-286:80.0 142-211:76.0 61-81:46.0 89-107:42.0	325	1.55e-18	212	0.6543	78	0.3679	4	286	5	314	Auxeprot1_GeneCatalog_proteins_20170909.aa
YihU_b3882_SLA-reductase_Ecoli_K12_1	Symbiochloris reticulata Scotland extracted metagenome v1.0	Trebouxiophyceae, Chlorophyta	SymretSc1|313590	227-286:90.0 4-74:86.0 145-207:71.0 81-121:42.0	289	5.21e-19	235	0.6403	72	0.3064	4	286	84	362	SymretSc1_GeneCatalog_proteins_20180314.aa
YihU_b3882_SLA-reductase_Ecoli_K12_1	Symbiochloris reticulata Switzerland extracted metagenome v1.0	Trebouxiophyceae, Chlorophyta	SymretSw1|565216	227-286:90.0 4-74:86.0 145-207:71.0 81-121:42.0	289	5.35e-19	235	0.6403	72	0.3064	4	286	84	362	SymretSw1_GeneCatalog_proteins_20180321.aa
YihU_b3882_SLA-reductase_Ecoli_K12_1	Symbiochloris reticulata Africa extracted metagenome v1.0	Trebouxiophyceae, Chlorophyta	SymretAf1|567732	227-286:88.0 4-74:86.0 145-207:71.0 81-121:42.0	287	9.81e-19	235	0.6403	72	0.3064	4	286	84	362	SymretAf1_GeneCatalog_proteins_20180322.aa
YihU_b3882_SLA-reductase_Ecoli_K12_1	Naegleria gruberi v1.0	Heterolobosea, Percolozoa	Naegr1|81719	219-283:71.0 74-120:70.0 4-26:60.0 148-211:49.0	250	3.37e-12	199	0.6378	55	0.2764	4	283	16	296	Naegr1_best_proteins
YihU_b3882_SLA-reductase_Ecoli_K12_1	Thalassiosira pseudonana CCMP 1335	Bacillariophyceae, Stramenopila	Thaps3|2669	61-121:78.0 223-270:74.0 1-24:67.0 165-226:51.0	270	5.94e-15	195	0.6352	63	0.3231	1	270	1	282	Thaps3_geneModels_FilteredModels2_aa
YihU_b3882_SLA-reductase_Ecoli_K12_1	Blastocystis hominis Singapore isolate B (sub-type 7)	Blastocystae, Stramenopila	Blahom1|5855	223-292:98.0 71-121:85.0 4-44:82.0 142-177:56.0	321	4.57e-22	198	0.6326	63	0.3182	4	292	8	305	Blahom1_GeneCatalog_proteins_20180131.aa
YihU_b3882_SLA-reductase_Ecoli_K12_1	Symbiodinium microadriaticum CCMP2467	Dinophyceae, Miozoa	Symmic1|4430	223-286:133.0 72-121:77.0 3-44:65.0 149-175:43.0	318	1.18e-20	183	0.631	66	0.3607	3	286	6	288	Symmic1_GeneCatalog_proteins_20180603.aa
YihU_b3882_SLA-reductase_Ecoli_K12_1	Emiliania huxleyi CCMP1516 v1.0	Coccolithophyceae, Haptophyta	Emihu1|434867	1-44:94.0 61-121:91.0 147-211:76.0 233-291:67.0	328	8.46e-24	229	0.624	78	0.3406	1	291	3	304	Emihu1_reduced_proteins
YihU_b3882_SLA-reductase_Ecoli_K12_1	Sorghum bicolor	Magnoliophyta, Plantae	Sorbi1|5053222	4-121:123.0 232-287:86.0 145-224:75.0	284	6.65e-22	254	0.6225	70	0.2756	4	287	126	408	Sorbi1_GeneModels_Sbi1_4_aa
YihU_b3882_SLA-reductase_Ecoli_K12_1	Physcomitrella patens subsp patens v1.1	Bryophyta, Plantae	Phypa1_1|205200	4-87:148.0 142-211:93.0 222-284:84.0	325	4.35e-26	217	0.6165	74	0.341	4	284	21	339	proteins.FilterdModels3
YihU_b3882_SLA-reductase_Ecoli_K12_1	Aurantiochytrium limacinum ATCC MYA-1381	Thraustochytriales, Stramenopila	Aurli1|140813	30-121:129.0 240-279:79.0 142-175:69.0 4-24:60.0	337	9.25e-24	187	0.6091	73	0.3904	4	279	5	287	Aurli1_GeneCatalog_proteins_20120618.aa
YihU_b3882_SLA-reductase_Ecoli_K12_1	Fragilariopsis cylindrus CCMP 1102	Bacillariophyceae, Stramenopila	Fracy1|180727	223-270:65.0 2-24:59.0 63-121:57.0 165-225:50.0	231	9.41e-10	191	0.6044	54	0.2827	2	270	3	282	Fracy1_GeneModels_FilteredModels2_aa
YihU_b3882_SLA-reductase_Ecoli_K12_1	Arabidopsis lyrata	Magnoliophyta, Plantae	Araly1|329506	4-84:136.0 147-207:75.0 226-282:62.0 89-105:44.0	317	1.33e-20	216	0.5806	73	0.338	4	282	41	361	Araly1_GeneModels_FilteredModels6_aa
YihU_b3882_SLA-reductase_Ecoli_K12_1	Ochromonadaceae sp. CCMP2298 v1.0	Synurophyceae, Ochrophyta, Stramenopila	Ochro2298_1|454817	6-121:183.0 233-271:71.0 144-175:54.0	308	4.14e-24	187	0.565	68	0.3636	6	271	39	310	Ochro2298_1_GeneCatalog_proteins_20160817.aa
YihU_b3882_SLA-reductase_Ecoli_K12_1	Coccomyxa sp. C-169	Trebouxiophyceae, Chlorophyta	Coc_C169_1|14707	224-287:116.0 142-207:76.0 4-44:73.0	265	1.32e-18	171	0.5607	61	0.3567	4	287	22	301	Coccomyxa_C169_v2_filtered_proteins
YihU_b3882_SLA-reductase_Ecoli_K12_1	Phaeodactylum tricornutum CCAP 1055/1 v2.0	Bacillariophyceae, Stramenopila	Phatr2|45141	145-211:94.0 226-287:88.0 2-23:68.0 88-121:51.0	301	5.16e-19	185	0.5572	70	0.3784	2	287	40	330	Phatr2_geneModels_FilteredModels2_aa
YihU_b3882_SLA-reductase_Ecoli_K12_1	Schizochytrium aggregatum ATCC 28209	Labyrinthulomycetes, Stramenopila	Schag1|82768	61-121:98.0 233-280:86.0 4-32:78.0 145-175:69.0	331	4.25e-23	169	0.5541	68	0.4024	4	280	5	287	Schag1_GeneCatalog_proteins_20121220.aa
YihU_b3882_SLA-reductase_Ecoli_K12_1	Micromonas pusilla CCMP1545	Mamiellophyceae, Chlorophyta	MicpuC3v2|539	224-283:105.0 4-44:87.0 145-224:73.0 84-126:49.0	314	3.07e-22	224	0.5504	71	0.317	4	283	127	402	MicpuC3v2_GeneCatalog_proteins_20131216.aa
YihU_b3882_SLA-reductase_Ecoli_K12_1	Micromonas commoda NOUM17 (RCC 299)	Mamiellophyceae, Chlorophyta	MicpuN3v2|8646	224-287:121.0 4-44:92.0 151-224:60.0	273	1.84e-19	179	0.5424	63	0.352	4	287	50	329	MicpuN3v2_GeneCatalog_proteins_20131216.aa
YihU_b3882_SLA-reductase_Ecoli_K12_1	Pseudo-nitzschia multiseries CLN-47	Bacillariophyceae, Stramenopila	Psemu1|201728	223-270:65.0 77-121:61.0 4-24:60.0 165-224:51.0	237	1.7e-10	174	0.537	54	0.3103	4	270	12	291	Psemu1_GeneCatalog_proteins_20111011.aa
YihU_b3882_SLA-reductase_Ecoli_K12_1	Galdieria sulphuraria 074W	Cyanidiophyceae, Rhodophyta	Galsul1|3189	4-40:86.0 222-296:85.0 146-211:60.0	231	4.07e-14	178	0.5345	55	0.309	4	296	24	326	Galsul1_GeneCatalog_proteins_20180411.aa
YihU_b3882_SLA-reductase_Ecoli_K12_1	Monoraphidium neglectum SAG 48.87	Chlorophyceae, Chlorophyta	Monneg1|7398	4-44:102.0 142-211:85.0 90-105:46.0 221-266:46.0 61-81:43.0	322	1.26e-17	194	0.5315	76	0.3918	4	266	46	336	Monneg1_GeneCatalog_proteins_20170920.aa
YihU_b3882_SLA-reductase_Ecoli_K12_1	Tetrahymena thermophila SB210	Ciliophora, Oligohymenophorea	Tetthe1|3295046	233-284:89.0 62-121:88.0 4-24:71.0 142-175:50.0	298	3.8e-18	167	0.5285	63	0.3772	4	284	19	307	Tetthe1_GeneCatalog_proteins_20191114.aa
YihU_b3882_SLA-reductase_Ecoli_K12_1	Thalassiosira oceanica CCMP1005	Bacillariophyceae, Stramenopila	Thaoce1|101827	223-270:74.0 165-221:62.0 3-24:59.0 61-97:46.0	241	7.77e-11	164	0.5157	57	0.3476	3	270	2	284	Thaoce1_GeneCatalog_proteins_20171026.aa
YihU_b3882_SLA-reductase_Ecoli_K12_1	Picochlorum sp. SENEW3	Trebouxiophyceae, Chlorophyta	Picsp_1|836	4-31:74.0 228-287:66.0 59-121:49.0	189	1.25e-08	151	0.5067	39	0.2583	4	287	11	296	Picsp_1_GeneCatalog_proteins_20170909.aa
YihU_b3882_SLA-reductase_Ecoli_K12_1	Nannochloropsis oceanica CCMP1779 v2.0		Nanoce1779_2|585179	254-282:75.0 4-23:73.0 150-175:66.0 90-121:63.0 221-252:61.0 29-66:45.0	383	5.4e-22	177	0.4986	80	0.452	4	282	55	340	Nanoce1779_2_GeneCatalog_proteins_20180119
YihU_b3882_SLA-reductase_Ecoli_K12_1	Chromochloris zofingiensis SAG 211-14		Chrzof1|14383	4-44:120.0 221-291:75.0 142-175:70.0 61-83:44.0	309	7.72e-20	169	0.4942	67	0.3964	4	291	18	338	Chrzof1_GeneCatalog_proteins_20190731.aa
YihU_b3882_SLA-reductase_Ecoli_K12_1	Bigelowiella natans CCMP2755		Bigna1|55040	220-283:80.0 71-99:65.0 149-177:64.0 4-44:57.0	266	3.95e-14	163	0.4939	51	0.3129	4	283	40	319	Bigna1_filtered_proteins
YihU_b3882_SLA-reductase_Ecoli_K12_1	Ectocarpus siliculosus Ec 32		Ectsil1|20971	78-121:83.0 142-175:79.0 233-268:70.0 12-38:64.0 60-77:48.0	344	1.72e-20	159	0.4775	69	0.434	12	268	1	298	Ectsil1_GeneCatalog_proteins_20171109.aa
YihU_b3882_SLA-reductase_Ecoli_K12_1	Raphidocelis subcapitata NIES-35		Rapsub1|5514	3-44:114.0 142-211:102.0 221-268:56.0 90-105:46.0	318	7.49e-21	176	0.4571	72	0.4091	3	268	60	358	Rapsub1_GeneCatalog_proteins_20191119.aa
YihU_b3882_SLA-reductase_Ecoli_K12_1	Symbiochloris reticulata Spain reference genome v1.0		Dicre1|762072	4-44:95.0 147-191:66.0 233-268:62.0 61-81:56.0	279	4.65e-16	143	0.4051	58	0.4056	4	268	38	330	Dicre1_GeneCatalog_proteins_20171101.aa
YihU_b3882_SLA-reductase_Ecoli_K12_1	Symbiochloris reticulata Spain extracted metagenome v1.0		SymretSp1|844621	4-44:95.0 147-191:66.0 233-268:62.0 61-81:56.0	279	4.73e-16	143	0.4051	58	0.4056	4	268	38	330	SymretSp1_GeneCatalog_proteins_20171013.aa
YihU_b3882_SLA-reductase_Ecoli_K12_1	Bathycoccus prasinos RCC1105		Batpra1|4322	230-287:108.0 4-25:56.0 165-226:52.0	216	6.55e-12	142	0.3912	50	0.3521	4	287	72	361	Batpra1_GeneCatalog_proteins_20180426.aa
YihU_b3882_SLA-reductase_Ecoli_K12_1	Porphyra umbilicalis isolate 4086291		Porumb1|11276	233-286:97.0 4-42:96.0 160-206:54.0 89-99:41.0	288	5.91e-17	151	0.3842	64	0.4238	4	286	63	378	Porumb1_GeneCatalog_proteins_20180417.aa
YihU_b3882_SLA-reductase_Ecoli_K12_1	Cyanidioschyzon merolae strain 10D		Cyamer1|54046	224-287:96.0 1-31:89.0 75-121:47.0	232	4.08e-14	142	0.3422	49	0.3451	1	287	102	407	Cyamer1_GeneCatalog_proteins_20180616.aa
YihU_b3882_SLA-reductase_Ecoli_K12_1	Reticulomyxa filosa		Retfil1|30889	223-283:103.0 71-121:80.0	183	1.24e-11	112	0.3182	33	0.2946	71	283	67	330	Retfil1_GeneCatalog_proteins_20180531.aa
YihU_b3882_SLA-reductase_Ecoli_K12_1	Selaginella moellendorffii v1.0		Selmo1|440731	2-121:158.0 210-292:127.0 4-121:151.0 162-221:56.0 142-163:43.0	535	5.5e-25	403	0.2395	126	0.3127	2	292	6	579	Selmo1_GeneModels_FilteredModels3_aa
Query Name	Organism	Phylogenetic affinity	Hit	Hsp	Score	EValue	Alignment Length	% Hit Coverage	Hit Identity	% Hit Identity	Query Start	Query End	Hit Start	Hit End	Dataset
YihV_b3883_SF-kinase_Ecoli_K12_1	Asterochloris sp. Cgr/DA1pho v2.0	Trebouxiophyceae, Chlorophyta	Astpho2|4544	246-294:95.0 58-117:63.0 132-198:49.0	207	1.3e-10	176	0.5116	54	0.3068	58	294	52	344	Astpho2_GeneCatalog_proteins_20111209.aa
YihV_b3883_SF-kinase_Ecoli_K12_1	Symbiochloris reticulata Africa extracted metagenome v1.0		SymretAf1|432165	246-285:74.0 58-103:71.0 132-199:55.0	200	1.1e-09	154	0.4503	49	0.3182	58	285	47	332	SymretAf1_GeneCatalog_proteins_20180322.aa
YihV_b3883_SF-kinase_Ecoli_K12_1	Sorghum bicolor		Sorbi1|5044200	58-100:67.0 131-198:60.0 246-291:50.0	177	3.46e-06	157	0.4313	48	0.3057	58	291	67	360	Sorbi1_GeneModels_Sbi1_4_aa
YihV_b3883_SF-kinase_Ecoli_K12_1	Chlorella sp. NC64A		ChlNC64A_1|25015	246-285:76.0 58-103:70.0 136-198:43.0	189	3.15e-08	149	0.4174	48	0.3221	58	285	64	345	Chlorella_NC64A_filtered_proteins
YihV_b3883_SF-kinase_Ecoli_K12_1	Nannochloropsis oceanica CCMP1779 v2.0		Nanoce1779_2|581066	60-104:62.0 270-285:52.0 143-212:50.0 3-27:42.0	206	2.3e-06	156	0.3969	49	0.3141	3	285	59	380	Nanoce1779_2_GeneCatalog_proteins_20180119
YihV_b3883_SF-kinase_Ecoli_K12_1	Symbiochloris reticulata Scotland extracted metagenome v1.0		SymretSc1|204502	246-285:74.0 58-103:71.0 132-199:55.0	200	1.57e-09	154	0.3756	49	0.3182	58	285	119	400	SymretSc1_GeneCatalog_proteins_20180314.aa
YihV_b3883_SF-kinase_Ecoli_K12_1	Galdieria sulphuraria 074W		Galsul1|6706	54-100:79.0 246-295:56.0 136-177:46.0	181	2.75e-07	139	0.3601	44	0.3165	54	295	99	378	Galsul1_GeneCatalog_proteins_20180411.aa
YihV_b3883_SF-kinase_Ecoli_K12_1	Symbiochloris reticulata Spain extracted metagenome v1.0		SymretSp1|794852	246-285:74.0 58-103:71.0 132-199:55.0	200	1.93e-09	154	0.3355	49	0.3182	58	285	104	449	SymretSp1_GeneCatalog_proteins_20171013.aa
YihV_b3883_SF-kinase_Ecoli_K12_1	Symbiochloris reticulata Switzerland extracted metagenome v1.0		SymretSw1|559654	246-285:74.0 58-103:71.0 132-199:55.0	200	2.03e-09	154	0.3355	49	0.3182	58	285	104	449	SymretSw1_GeneCatalog_proteins_20180321.aa
YihV_b3883_SF-kinase_Ecoli_K12_1	Symbiochloris reticulata Spain reference genome v1.0		Dicre1|795107	246-285:74.0 58-103:71.0 132-199:55.0	200	1.9e-09	154	0.3355	49	0.3182	58	285	104	449	Dicre1_GeneCatalog_proteins_20171101.aa
YihV_b3883_SF-kinase_Ecoli_K12_1	Auxenochlorella protothecoides 0710		Auxeprot1|4774	246-289:76.0 55-113:72.0	148	1.75e-07	103	0.3121	33	0.3204	55	289	64	315	Auxeprot1_GeneCatalog_proteins_20170909.aa
YihV_b3883_SF-kinase_Ecoli_K12_1	Coccomyxa sp. C-169		Coc_C169_1|17448	58-103:82.0 246-285:74.0	156	2.14e-08	86	0.2688	34	0.3953	58	285	39	309	Coccomyxa_C169_v2_filtered_proteins
YihV_b3883_SF-kinase_Ecoli_K12_1	Chlamydomonas reinhardtii v4.0		Chlre4|101965	58-103:74.0 246-285:70.0	144	1.88e-06	86	0.2493	32	0.3721	58	285	47	328	Chlre4_best_proteins
YihV_b3883_SF-kinase_Ecoli_K12_1	Aplanochytrium kerguelense PBS07 v1.0		Aplke1|43958	54-124:103.0	103	1.79e-06	71	0.232	21	0.2958	54	124	53	123	Aplke1_GeneCatalog_proteins_20121220.aa
YihV_b3883_SF-kinase_Ecoli_K12_1	Bathycoccus prasinos RCC1105		Batpra1|1189	55-107:91.0 246-285:60.0	151	1.3e-07	93	0.2308	33	0.3548	55	285	76	362	Batpra1_GeneCatalog_proteins_20180426.aa
YihV_b3883_SF-kinase_Ecoli_K12_1	Chromochloris zofingiensis SAG 211-14		Chrzof1|12182	246-296:75.0 58-103:70.0	145	1.66e-06	97	0.2091	35	0.3608	58	296	107	464	Chrzof1_GeneCatalog_proteins_20190731.aa
YihV_b3883_SF-kinase_Ecoli_K12_1	Gonium pectorale NIES-2863		Gonpec1|7578	246-289:85.0 58-103:59.0	144	2.41e-06	90	0.2022	33	0.3667	58	289	74	436	Gonpec1_GeneCatalog_proteins_20180501.aa
YihV_b3883_SF-kinase_Ecoli_K12_1	Picochlorum sp. SENEW3		Picsp_1|1176	58-100:87.0 246-288:63.0	150	1.57e-07	86	0.1937	31	0.3605	58	288	83	439	Picsp_1_GeneCatalog_proteins_20170909.aa

## Sheet: Blast hits P. putida SQ1
Supplementary Table 3: GenBank accession numbers, annotations, protein sequence coverages, maximal identities, and BLAST scores of homologues of hypothetical genes involved in bacterial sulfoglycolysis of Escherichia coli-K12 (a) and Pseudomonas putida (b) in different species of algae surveyed here and other eukaryotes in general. (b) BLAST hits for the SQ degradation pathway from Pseudomonas pu…
Query Name	Organism	Phylogenetic affinity	Hit	Hsp	Score	EValue	Alignment Length	% Hit Coverage	Hit Identity	% Hit Identity	Query Start	Query End	Hit Start	Hit End	Dataset
PpSQ1_00088_SLA-dehydrogenase_Pseudomonas_putida_SQ1_1	Physcomitrella patens subsp patens v1.1	Bryophyta, Plantae	Phypa1_1|113098	113-484:1217.0 1-110:243.0	1460	0	482	0.9837	266	0.5519	1	484	1	485	proteins.FilterdModels3
PpSQ1_00088_SLA-dehydrogenase_Pseudomonas_putida_SQ1_1	Populus trichocarpa v1.1	Magnoliophyta, Plantae	gw1.X.1285.1	3-486:1425.0	1425	0	484	0.9778	266	0.5496	3	486	12	495	AllJamboreeModels.named_proteins
PpSQ1_00088_SLA-dehydrogenase_Pseudomonas_putida_SQ1_1	Saprolegnia parasitica CBS 223.65	Oomycota, Stramenopila	Sappar1|27678	213-484:774.0 4-210:459.0	1233	2.95e-156	479	0.9677	240	0.501	4	484	11	494	Sappar1_GeneCatalog_proteins_20180131.aa
PpSQ1_00088_SLA-dehydrogenase_Pseudomonas_putida_SQ1_1	Selaginella moellendorffii v1.0	Lycopodiopsida, Plantae	Selmo1|230009	3-484:1496.0	1496	0	482	0.9659	278	0.5768	3	484	16	497	Selmo1_GeneModels_FilteredModels3_aa
PpSQ1_00088_SLA-dehydrogenase_Pseudomonas_putida_SQ1_1	Guillardia theta CCMP2712	Cryptophyta, Stramenopila	Guith1|74648	4-213:530.0 212-361:463.0 367-482:415.0	1408	3.86e-175	476	0.9539	266	0.5588	4	482	8	487	Guith1_GeneCatalog_proteins_20101209.aa
PpSQ1_00088_SLA-dehydrogenase_Pseudomonas_putida_SQ1_1	Ectocarpus siliculosus Ec 32	Phaeophyceae, Ochrophyta, Stramenopila	Ectsil1|16473	216-360:403.0 360-484:328.0 129-210:255.0 4-121:221.0	1207	1.01e-142	470	0.9419	231	0.4915	4	484	16	499	Ectsil1_GeneCatalog_proteins_20171109.aa
PpSQ1_00088_SLA-dehydrogenase_Pseudomonas_putida_SQ1_1	Phytophthora capsici LT1534 v11.0	Oomycota, Stramenopila	Phyca11|5840	206-485:732.0 65-211:356.0 4-47:101.0	1189	2.7e-145	471	0.9345	232	0.4926	4	485	20	504	Phyca11_filtered_proteins
PpSQ1_00088_SLA-dehydrogenase_Pseudomonas_putida_SQ1_1	Aurantiochytrium limacinum ATCC MYA-1381	Thraustochytriales, Stramenopila	Aurli1|41840	28-213:466.0 330-481:450.0 209-324:357.0 10-25:49.0	1322	1.4e-158	470	0.9325	240	0.5106	10	481	32	501	Aurli1_GeneCatalog_proteins_20120618.aa
PpSQ1_00088_SLA-dehydrogenase_Pseudomonas_putida_SQ1_1	Chrysochromulina tobin CCMP291	Prymnesiales, Haptophyta	Chrsp_1|173390	2-214:578.0 213-361:467.0 355-482:360.0	1405	7.78e-175	490	0.9298	268	0.5469	2	482	38	522	Chrsp_1_GeneCatalog_proteins_20180813.aa
PpSQ1_00088_SLA-dehydrogenase_Pseudomonas_putida_SQ1_1	Phytophthora sojae v3.0	Oomycota, Stramenopila	Physo3|489802	214-485:793.0 63-210:379.0 9-47:97.0	1269	4.67e-156	459	0.9273	243	0.5294	9	485	15	494	Physo3_GeneCatalog_proteins_20110401.aa
PpSQ1_00088_SLA-dehydrogenase_Pseudomonas_putida_SQ1_1	Chlorella sp. NC64A	Trebouxiophyceae, Chlorophyta	ChlNC64A_1|48452	4-361:946.0 365-482:400.0	1346	4.26e-172	476	0.9261	252	0.5294	4	482	24	509	Chlorella_NC64A_filtered_proteins
PpSQ1_00088_SLA-dehydrogenase_Pseudomonas_putida_SQ1_1	Pseudo-nitzschia multiseries CLN-47	Bacillariophyceae, Stramenopila	Psemu1|240136	211-353:328.0 363-479:292.0 84-129:109.0 141-222:234.0	963	4.08e-80	388	0.926	186	0.4794	84	479	1	412	Psemu1_GeneCatalog_proteins_20111011.aa
PpSQ1_00088_SLA-dehydrogenase_Pseudomonas_putida_SQ1_1	Phytophthora infestans T30-4	Oomycota, Stramenopila	Phyinf1|5853	212-485:788.0 63-210:377.0 3-47:95.0	1260	6.06e-155	467	0.9211	243	0.5203	3	485	22	507	Phyinf1_GeneCatalog_proteins_20180122.aa
PpSQ1_00088_SLA-dehydrogenase_Pseudomonas_putida_SQ1_1	Arabidopsis lyrata	Magnoliophyta, Plantae	Araly1|477110	3-486:1383.0	1383	0	484	0.9184	261	0.5393	3	486	43	526	Araly1_GeneModels_FilteredModels6_aa
PpSQ1_00088_SLA-dehydrogenase_Pseudomonas_putida_SQ1_1	Thalassiosira pseudonana CCMP 1335	Bacillariophyceae, Stramenopila	Thaps3|268262	216-359:409.0 140-214:231.0 65-126:164.0 350-481:324.0	1128	1.56e-92	413	0.9117	216	0.523	65	481	20	451	Thaps3_geneModels_FilteredModels2_aa
PpSQ1_00088_SLA-dehydrogenase_Pseudomonas_putida_SQ1_1	Phytophthora cinnamomi var cinnamomi v1.0	Oomycota, Stramenopila	Phyci1|94746	214-485:789.0 63-210:382.0 3-47:101.0	1272	1.61e-156	465	0.91	245	0.5269	3	485	25	510	Phyci1_GeneCatalog_proteins_20120612.aa
PpSQ1_00088_SLA-dehydrogenase_Pseudomonas_putida_SQ1_1	Blastocystis hominis Singapore isolate B (sub-type 7)	Blastocystae, Stramenopila	Blahom1|4653	206-485:806.0 137-210:224.0 62-137:168.0	1198	5.68e-147	430	0.9091	228	0.5302	62	485	40	468	Blahom1_GeneCatalog_proteins_20180131.aa
PpSQ1_00088_SLA-dehydrogenase_Pseudomonas_putida_SQ1_1	Asterochloris sp. Cgr/DA1pho v2.0	Trebouxiophyceae, Chlorophyta	Astpho2|9046	123-364:747.0 366-482:368.0 62-114:166.0 4-46:118.0	1399	2.68e-169	455	0.9046	260	0.5714	4	482	16	496	Astpho2_GeneCatalog_proteins_20111209.aa
PpSQ1_00088_SLA-dehydrogenase_Pseudomonas_putida_SQ1_1	Ochromonadaceae sp. CCMP2298 v1.0	Synurophyceae, Ochrophyta, Stramenopila	Ochro2298_1|344107	359-482:380.0 216-320:304.0 139-220:267.0 65-143:162.0 330-362:104.0 22-47:70.0	1287	2.43e-144	449	0.898	244	0.5434	22	482	26	498	Ochro2298_1_GeneCatalog_proteins_20160817.aa
PpSQ1_00088_SLA-dehydrogenase_Pseudomonas_putida_SQ1_1	Emiliania huxleyi CCMP1516 v1.0	Coccolithophyceae, Haptophyta	Emihu1|443869	356-484:430.0 2-110:259.0 209-282:223.0 167-216:140.0 287-369:228.0	1280	1.67e-118	445	0.8918	255	0.573	2	484	29	496	Emihu1_reduced_proteins
PpSQ1_00088_SLA-dehydrogenase_Pseudomonas_putida_SQ1_1	Scenedesmus obliquus UTEX 393	Chlorophyceae, Chlorophyta	Sobl393_1|5473	62-359:886.0 365-482:407.0 3-46:87.0	1380	2.23e-171	460	0.8897	255	0.5543	3	482	29	513	Sobl393_1_GeneCatalog_proteins_20200120.aa
PpSQ1_00088_SLA-dehydrogenase_Pseudomonas_putida_SQ1_1	Auxenochlorella protothecoides 0710	Trebouxiophyceae, Chlorophyta	Auxeprot1|175	62-298:738.0 372-482:325.0 296-361:143.0 4-43:109.0 366-375:49.0	1364	6.73e-160	464	0.8872	251	0.5409	4	482	20	520	Auxeprot1_GeneCatalog_proteins_20170909.aa
PpSQ1_00088_SLA-dehydrogenase_Pseudomonas_putida_SQ1_1	Aplanochytrium kerguelense PBS07 v1.0	Labyrinthulomycetes, Stramenopila	Aplke1|69004	27-210:524.0 327-481:506.0 216-324:363.0 4-21:41.0	1434	4.69e-174	466	0.8859	269	0.5773	4	481	45	523	Aplke1_GeneCatalog_proteins_20121220.aa
PpSQ1_00088_SLA-dehydrogenase_Pseudomonas_putida_SQ1_1	Chondrus crispus Stackhouse	Florideophyceae, Rhodophyta	Chocri1|6482	22-210:404.0 209-301:244.0 411-481:210.0 302-359:128.0 368-409:102.0	1088	3.67e-122	453	0.8779	216	0.4768	22	481	33	514	Chocri1_GeneCatalog_proteins_20180417.aa
PpSQ1_00088_SLA-dehydrogenase_Pseudomonas_putida_SQ1_1	Schizochytrium aggregatum ATCC 28209	Labyrinthulomycetes, Stramenopila	Schag1|99318	65-215:461.0 209-360:456.0 381-481:338.0 9-47:93.0	1348	2.78e-162	443	0.8772	248	0.5598	9	481	26	502	Schag1_GeneCatalog_proteins_20121220.aa
PpSQ1_00088_SLA-dehydrogenase_Pseudomonas_putida_SQ1_1	Naegleria gruberi v1.0	Heterolobosea, Percolozoa	Naegr1|81202	145-249:257.0 265-365:125.0 396-479:121.0 12-45:67.0 65-102:56.0 350-402:101.0 240-279:54.0	781	1.16e-55	455	0.8601	166	0.3648	12	479	42	516	Naegr1_best_proteins
PpSQ1_00088_SLA-dehydrogenase_Pseudomonas_putida_SQ1_1	Coccomyxa sp. C-169	Trebouxiophyceae, Chlorophyta	Coc_C169_1|34715	62-361:885.0 366-482:377.0 3-43:100.0	1362	3.31e-169	458	0.8529	249	0.5437	3	482	45	529	Coccomyxa_C169_v2_filtered_proteins
PpSQ1_00088_SLA-dehydrogenase_Pseudomonas_putida_SQ1_1	Oxytricha trifallax JRB310	Spirotrichea, Ciliophora	Oxytri1|3176670	250-481:453.0 146-243:232.0 64-133:103.0 13-47:70.0	858	9.1e-95	435	0.8529	172	0.3954	13	481	35	502	Oxytri1_GeneCatalog_proteins_20191115.aa
PpSQ1_00088_SLA-dehydrogenase_Pseudomonas_putida_SQ1_1	Galdieria sulphuraria 074W	Cyanidiophyceae, Rhodophyta	Galsul1|4761	214-484:823.0 29-143:267.0 140-216:253.0 2-23:59.0	1402	6.98e-170	485	0.8509	263	0.5423	2	484	81	566	Galsul1_GeneCatalog_proteins_20180411.aa
PpSQ1_00088_SLA-dehydrogenase_Pseudomonas_putida_SQ1_1	Ostreococcus lucimarinus	Mamiellophyceae, Chlorophyta	Ost9901_3|42872	69-324:804.0 366-484:347.0 328-361:84.0 25-43:48.0	1283	1.4e-153	428	0.8509	244	0.5701	25	484	44	503	Olucimarinus_FM_aa
PpSQ1_00088_SLA-dehydrogenase_Pseudomonas_putida_SQ1_1	Dunaliella salina CCAP19-18	Chlorophyceae, Chlorophyta	Dunsal1|8117	62-364:862.0 366-482:420.0 28-46:55.0 4-25:44.0	1381	1.36e-166	461	0.8459	259	0.5618	4	482	57	541	Dunsal1_GeneCatalog_proteins_20180508.aa
PpSQ1_00088_SLA-dehydrogenase_Pseudomonas_putida_SQ1_1	Nannochloropsis oceanica CCMP1779 v2.0	Eustigmatophyceae, Ochrophyta	Nanoce1779_2|672574	214-484:828.0 22-211:535.0 4-26:67.0	1430	1.67e-178	484	0.8432	266	0.5496	4	484	89	573	Nanoce1779_2_GeneCatalog_proteins_20180119
PpSQ1_00088_SLA-dehydrogenase_Pseudomonas_putida_SQ1_1	Symbiochloris reticulata Africa extracted metagenome v1.0	Trebouxiophyceae, Chlorophyta	SymretAf1|545475	62-359:856.0 366-482:384.0 4-46:96.0	1336	1.4e-165	458	0.8419	238	0.5197	4	482	57	541	SymretAf1_GeneCatalog_proteins_20180322.aa
PpSQ1_00088_SLA-dehydrogenase_Pseudomonas_putida_SQ1_1	Symbiochloris reticulata Scotland extracted metagenome v1.0	Trebouxiophyceae, Chlorophyta	SymretSc1|312367	62-359:856.0 366-482:384.0 4-46:96.0	1336	1.37e-165	458	0.8419	238	0.5197	4	482	57	541	SymretSc1_GeneCatalog_proteins_20180314.aa
PpSQ1_00088_SLA-dehydrogenase_Pseudomonas_putida_SQ1_1	Symbiochloris reticulata Spain extracted metagenome v1.0	Trebouxiophyceae, Chlorophyta	SymretSp1|727986	62-359:851.0 366-482:384.0 4-46:96.0	1331	6.48e-165	458	0.8419	238	0.5197	4	482	57	541	SymretSp1_GeneCatalog_proteins_20171013.aa
PpSQ1_00088_SLA-dehydrogenase_Pseudomonas_putida_SQ1_1	Symbiochloris reticulata Switzerland extracted metagenome v1.0	Trebouxiophyceae, Chlorophyta	SymretSw1|331437	62-359:851.0 366-482:384.0 4-46:96.0	1331	6.82e-165	458	0.8419	238	0.5197	4	482	57	541	SymretSw1_GeneCatalog_proteins_20180321.aa
PpSQ1_00088_SLA-dehydrogenase_Pseudomonas_putida_SQ1_1	Symbiochloris reticulata Spain reference genome v1.0	Trebouxiophyceae, Chlorophyta	Dicre1|336740	62-359:851.0 366-482:384.0 4-46:96.0	1331	6.37e-165	458	0.8419	238	0.5197	4	482	57	541	Dicre1_GeneCatalog_proteins_20171101.aa
PpSQ1_00088_SLA-dehydrogenase_Pseudomonas_putida_SQ1_1	Raphidocelis subcapitata NIES-35	Chlorophyceae, Chlorophyta	Rapsub1|7291	65-363:854.0 365-482:410.0 4-46:104.0	1368	9.22e-170	460	0.841	253	0.55	4	482	54	538	Rapsub1_GeneCatalog_proteins_20191119.aa
PpSQ1_00088_SLA-dehydrogenase_Pseudomonas_putida_SQ1_1	Nannochloropsis gaditana B-31	Eustigmatophyceae, Ochrophyta	Nangad1|10552	214-482:777.0 4-211:611.0	1388	6.96e-178	477	0.8368	257	0.5388	4	482	86	567	Nangad1_GeneCatalog_proteins_20180307.aa
PpSQ1_00088_SLA-dehydrogenase_Pseudomonas_putida_SQ1_1	Fragilariopsis cylindrus CCMP 1102	Bacillariophyceae, Stramenopila	Fracy1|275063	211-359:373.0 368-479:294.0 69-129:132.0 141-222:229.0	1028	1.52e-89	404	0.8364	201	0.4975	69	479	61	477	Fracy1_GeneModels_FilteredModels2_aa
PpSQ1_00088_SLA-dehydrogenase_Pseudomonas_putida_SQ1_1	Tetrahymena thermophila SB210	Ciliophora, Oligohymenophorea	Tetthe1|3312160	145-249:227.0 402-479:148.0 62-129:80.0 358-392:76.0 7-45:54.0 240-324:154.0	739	5.74e-50	410	0.8333	150	0.3659	7	479	8	483	Tetthe1_GeneCatalog_proteins_20191114.aa
PpSQ1_00088_SLA-dehydrogenase_Pseudomonas_putida_SQ1_1	Sorghum bicolor	Magnoliophyta, Plantae	Sorbi1|5053267	250-479:482.0 145-253:276.0 7-45:78.0 65-101:55.0	891	2.04e-96	415	0.8234	179	0.4313	7	479	19	494	Sorbi1_GeneModels_Sbi1_4_aa
PpSQ1_00088_SLA-dehydrogenase_Pseudomonas_putida_SQ1_1	Chromochloris zofingiensis SAG 211-14	Chlorophyceae, Chlorophyta	Chrzof1|10533	65-364:898.0 364-482:413.0 6-46:91.0	1402	1.9e-174	460	0.8229	256	0.5565	6	482	56	537	Chrzof1_GeneCatalog_proteins_20190731.aa
PpSQ1_00088_SLA-dehydrogenase_Pseudomonas_putida_SQ1_1	Trypanosoma brucei brucei TREU927	Kinetoplastea, Euglenozoa	Trybru1|3074	14-377:802.0 381-479:282.0	1084	4.94e-136	463	0.8224	208	0.4492	14	479	92	558	Trybru1_GeneCatalog_proteins_20180531.aa
PpSQ1_00088_SLA-dehydrogenase_Pseudomonas_putida_SQ1_1	Porphyra umbilicalis isolate 4086291	Bangiophyceae, Rhodophyta	Porumb1|3534	209-312:205.0 147-197:190.0 429-482:134.0 349-421:119.0	648	2.91e-64	282	0.8198	133	0.4716	147	482	1	344	Porumb1_GeneCatalog_proteins_20180417.aa
PpSQ1_00088_SLA-dehydrogenase_Pseudomonas_putida_SQ1_1	Micromonas commoda NOUM17 (RCC 299)	Mamiellophyceae, Chlorophyta	MicpuN3v2|4781	65-361:912.0 363-484:349.0 1-47:125.0	1386	2.36e-172	466	0.8161	258	0.5536	1	484	77	564	MicpuN3v2_GeneCatalog_proteins_20131216.aa
PpSQ1_00088_SLA-dehydrogenase_Pseudomonas_putida_SQ1_1	Reticulomyxa filosa	Foraminifera, Rhizaria	Retfil1|28716	81-211:416.0 217-351:390.0 366-478:379.0	1185	1.94e-144	379	0.7996	217	0.5726	81	478	2	421	Retfil1_GeneCatalog_proteins_20180531.aa
PpSQ1_00088_SLA-dehydrogenase_Pseudomonas_putida_SQ1_1	Paramecium tetraurelia d4_2	Ciliophora, Oligohymenophorea	Partet1|4778672	224-374:245.0 139-221:122.0 66-126:83.0 352-479:199.0	649	9.36e-44	423	0.7996	141	0.3333	66	479	116	526	Partet1_GeneCatalog_proteins_20191116.aa
PpSQ1_00088_SLA-dehydrogenase_Pseudomonas_putida_SQ1_1	Pelagophyceae sp. CCMP2097 v1.0	Pelagophyceae, Ochrophyta, Stramenopila	Pelago2097_1|457265	62-197:392.0 216-358:335.0 364-484:292.0	1019	7.72e-122	400	0.7843	195	0.4875	62	484	80	509	Pelago2097_1_GeneCatalog_proteins_20160408.aa
PpSQ1_00088_SLA-dehydrogenase_Pseudomonas_putida_SQ1_1	Phaeodactylum tricornutum CCAP 1055/1 v2.0	Bacillariophyceae, Stramenopila	Phatr2|28191	211-359:387.0 355-481:311.0 69-129:142.0 140-220:230.0	1070	2.98e-95	418	0.7842	203	0.4856	69	481	102	529	Phatr2_geneModels_FilteredModels2_aa
PpSQ1_00088_SLA-dehydrogenase_Pseudomonas_putida_SQ1_1	Monoraphidium neglectum SAG 48.87	Chlorophyceae, Chlorophyta	Monneg1|22	145-361:440.0 366-479:224.0 183-479:554.0 145-179:100.0	1318	3.47e-78	663	0.7773	274	0.4133	145	479	11	843	Monneg1_GeneCatalog_proteins_20170920.aa
PpSQ1_00088_SLA-dehydrogenase_Pseudomonas_putida_SQ1_1	Ostreococcus tauri RCC4221 v3.0	Mamiellophyceae, Chlorophyta	Ostta4221_3|75842	69-324:800.0 366-485:365.0 324-361:93.0 31-42:48.0	1306	1.17e-156	426	0.7745	247	0.5798	31	485	96	550	Ostta4221_3_GeneCatalog_proteins_20161028.aa
PpSQ1_00088_SLA-dehydrogenase_Pseudomonas_putida_SQ1_1	Cyanidioschyzon merolae strain 10D	Cyanidiophyceae, Rhodophyta	Cyamer1|56091	62-213:467.0 218-360:438.0 364-486:365.0	1270	8.8e-157	418	0.7726	240	0.5742	62	486	113	539	Cyamer1_GeneCatalog_proteins_20180616.aa
PpSQ1_00088_SLA-dehydrogenase_Pseudomonas_putida_SQ1_1	Phaeocystis globosa Pg-G v2.3	Prymnesiophyceae, Haptophyta	Phaglo1|20171	353-479:211.0 216-315:186.0 143-196:158.0 15-102:94.0	649	1.32e-63	369	0.7672	137	0.3713	15	479	7	473	Phaglo1_PrimaryTranscript_proteins_20181013.aa
PpSQ1_00088_SLA-dehydrogenase_Pseudomonas_putida_SQ1_1	Micromonas pusilla CCMP1545	Mamiellophyceae, Chlorophyta	MicpuC3v2|7005	65-361:852.0 366-486:337.0 26-47:61.0	1250	1.07e-153	440	0.7639	242	0.55	26	486	112	576	MicpuC3v2_GeneCatalog_proteins_20131216.aa
PpSQ1_00088_SLA-dehydrogenase_Pseudomonas_putida_SQ1_1	Ostreococcus sp. RCC809	Mamiellophyceae, Chlorophyta	OstRCC809_2|93185	66-324:791.0 367-485:339.0 324-361:99.0	1229	4.72e-151	416	0.7577	232	0.5577	66	485	131	549	OstRCC809FM3proteins
PpSQ1_00088_SLA-dehydrogenase_Pseudomonas_putida_SQ1_1	Pavlovales sp. CCMP2436 v1.0	Pavlovophyceae, Haptophyceae	Pavlov2436_1|1094765	211-359:223.0 365-479:215.0 143-212:165.0 66-121:59.0	662	1.76e-68	390	0.7209	147	0.3769	66	479	103	525	Pavlov2436_1_GeneCatalog_proteins_20160817.aa
PpSQ1_00088_SLA-dehydrogenase_Pseudomonas_putida_SQ1_1	Aureococcus anophagefferens clone 1984	Pelagophyceae, Ochrophyta, Stramenopila	jgi|Auran1|34350	65-198:415.0 214-295:264.0 423-484:197.0 364-418:106.0 293-345:66.0	1048	1.87e-116	386	0.7201	201	0.5207	65	484	95	534	Aureococcus_anophagefferens.proteinsFM3
PpSQ1_00088_SLA-dehydrogenase_Pseudomonas_putida_SQ1_1	Phaeocystis antarctica CCMP1374 v2.2	Prymnesiophyceae, Haptophyta	Phaant1|6583	147-274:293.0 366-445:166.0 270-359:121.0 451-479:103.0 65-103:60.0	743	2.78e-71	366	0.6932	152	0.4153	65	479	105	523	Phaant1_GeneCatalog_proteins_20181014.aa
PpSQ1_00088_SLA-dehydrogenase_Pseudomonas_putida_SQ1_1	Gonium pectorale NIES-2863	Chlorophyceae, Chlorophyta	Gonpec1|4874	65-364:852.0 365-482:411.0 22-46:58.0	1321	2.82e-163	443	0.6879	244	0.5508	22	482	172	637	Gonpec1_GeneCatalog_proteins_20180501.aa
PpSQ1_00088_SLA-dehydrogenase_Pseudomonas_putida_SQ1_1	Chlamydomonas reinhardtii v4.0	Chlorophyceae, Chlorophyta	Chlre4|390966	133-330:558.0 358-482:426.0 28-46:56.0 65-143:197.0 340-361:61.0	1298	3.58e-122	443	0.6458	245	0.553	28	482	215	666	Chlre4_best_proteins
PpSQ1_00088_SLA-dehydrogenase_Pseudomonas_putida_SQ1_1	Ostreococcus tauri RCC1115 v1.0	Mamiellophyceae, Chlorophyta	Ostta1115_2|198348	69-324:799.0 366-485:365.0 324-361:93.0 31-42:48.0	1305	1.61e-156	426	0.6445	247	0.5798	31	485	207	661	Ostta1115_2_GeneCatalog_proteins_20170131.aa
PpSQ1_00088_SLA-dehydrogenase_Pseudomonas_putida_SQ1_1	Bigelowiella natans CCMP2755	Chlorarachniophyceae, Cercozoa	Bigna1|92553	329-479:295.0 145-249:260.0 10-37:63.0 240-326:171.0	789	1.55e-64	371	0.6419	154	0.4151	10	479	93	568	Bigna1_filtered_proteins
PpSQ1_00088_SLA-dehydrogenase_Pseudomonas_putida_SQ1_1	Thalassiosira oceanica CCMP1005	Bacillariophyceae, Stramenopila	Thaoce1|100589	216-360:383.0 363-481:323.0 140-215:238.0	944	2.16e-111	340	0.6343	181	0.5324	140	481	189	534	Thaoce1_GeneCatalog_proteins_20171026.aa
PpSQ1_00088_SLA-dehydrogenase_Pseudomonas_putida_SQ1_1	Toxoplasma gondii ME49	Conoidasida, Apicomplexa	Toxgon1|6676	206-363:365.0 73-211:354.0 382-483:309.0 8-47:70.0	1098	1.73e-124	439	0.6192	213	0.4852	8	483	192	706	Toxgon1_GeneCatalog_proteins_20180601.aa
PpSQ1_00088_SLA-dehydrogenase_Pseudomonas_putida_SQ1_1	Symbiodinium microadriaticum CCMP2467	Dinophyceae, Miozoa	Symmic1|31499	121-248:225.0 366-473:211.0 267-361:181.0 66-111:70.0 15-47:61.0 247-268:59.0	807	1.24e-78	432	0.6008	166	0.3843	15	473	28	500	Symmic1_GeneCatalog_proteins_20180603.aa
PpSQ1_00088_SLA-dehydrogenase_Pseudomonas_putida_SQ1_1	Cryptophyceae sp. CCMP2293 v1.0	Cryptophyta, Stramenopila	Crypto2293_1|1623828	366-479:227.0 146-191:109.0 255-310:93.0 330-363:52.0 69-103:47.0 192-211:44.0	572	4.57e-44	305	0.5922	119	0.3902	69	479	64	487	Crypto2293_1_GeneCatalog_proteins_20160903.aa
PpSQ1_00088_SLA-dehydrogenase_Pseudomonas_putida_SQ1_1	Bathycoccus prasinos RCC1105	Mamiellophyceae, Chlorophyta	Batpra1|825	383-484:272.0 250-321:224.0 136-216:213.0 65-137:181.0 209-242:81.0	971	2.41e-102	362	0.5867	184	0.5083	65	484	178	617	Batpra1_GeneCatalog_proteins_20180426.aa
PpSQ1_00088_SLA-dehydrogenase_Pseudomonas_putida_SQ1_1	Volvox carteri nagariensis	Chlorophyceae, Chlorophyta	Volca1|93805	65-178:350.0 375-477:336.0 23-46:58.0	744	4.3e-82	241	0.5835	135	0.5602	23	477	53	336	proteins
PpSQ1_00088_SLA-dehydrogenase_Pseudomonas_putida_SQ1_1	Trichomonas vaginalis G3	Trichomonadea, Metamonada	Trivag1|44199	232-317:120.0 368-423:97.0 143-206:84.0 446-477:58.0	359	1.58e-24	238	0.5118	77	0.3235	143	477	106	435	Trivag1_GeneCatalog_proteins_20180531.aa
PpSQ1_00088_SLA-dehydrogenase_Pseudomonas_putida_SQ1_1	Picochlorum sp. SENEW3		Picsp_1|3332	31-361:923.0 366-482:365.0	1288	3.06e-164	448	0.3075	235	0.5246	31	482	994	1451	Picsp_1_GeneCatalog_proteins_20170909.aa
PpSQ1_00088_SLA-dehydrogenase_Pseudomonas_putida_SQ1_1	Scenedesmus obliquus EN0004 v1.0		SceoblEN4_1|614331	62-359:891.0 365-475:371.0 31-46:46.0	1308	1.4e-161	425	0.1733	243	0.5718	31	475	206	655	SceoblEN4_1_GeneCatalog_proteins_20190921.aa
Query Name	Organism	Phylogenetic affinity	Hit	Hsp	Score	EValue	Alignment Length	% Hit Coverage	Hit Identity	% Hit Identity	Query Start	Query End	Hit Start	Hit End	Dataset
PpSQ1_00089_SG-dehydratase_Pseudomonas_putida_SQ1_1	Populus trichocarpa v1.1	Magnoliophyta, Plantae	estExt_fgenesh4_pm.C_LG_III0598	198-343:216.0 470-565:169.0 39-78:90.0 102-160:84.0 377-403:61.0 438-454:61.0 410-440:52.0 365-374:41.0	774	1.77e-66	426	0.7041	162	0.3803	39	565	77	604	AllJamboreeModels.named_proteins
PpSQ1_00089_SG-dehydratase_Pseudomonas_putida_SQ1_1	Schizochytrium aggregatum ATCC 28209	Labyrinthulomycetes, Stramenopila	Schag1|55754	198-334:190.0 471-565:187.0 102-162:64.0 44-78:63.0 438-454:57.0 377-403:50.0	611	3.37e-49	372	0.6927	131	0.3522	44	565	14	536	Schag1_GeneCatalog_proteins_20121220.aa
PpSQ1_00089_SG-dehydratase_Pseudomonas_putida_SQ1_1	Bigelowiella natans CCMP2755	Chlorarachniophyceae, Cercozoa	Bigna1|92951	198-334:185.0 410-454:95.0 38-78:94.0 102-156:70.0 496-515:62.0 519-565:59.0 383-403:45.0	610	2.17e-44	366	0.6728	131	0.3579	38	565	28	543	Bigna1_filtered_proteins
PpSQ1_00089_SG-dehydratase_Pseudomonas_putida_SQ1_1	Ochromonadaceae sp. CCMP2298 v1.0	Synurophyceae, Ochrophyta, Stramenopila	Ochro2298_1|328370	198-334:200.0 471-565:163.0 40-78:81.0 102-156:74.0 432-454:65.0 377-403:51.0	634	5.55e-52	376	0.6655	135	0.359	40	565	38	564	Ochro2298_1_GeneCatalog_proteins_20160817.aa
PpSQ1_00089_SG-dehydratase_Pseudomonas_putida_SQ1_1	Aplanochytrium kerguelense PBS07 v1.0	Labyrinthulomycetes, Stramenopila	Aplke1|38408	198-334:204.0 470-565:167.0 38-78:83.0 102-157:66.0 432-454:63.0 383-403:52.0 411-428:47.0	682	5.34e-54	392	0.661	144	0.3673	38	565	64	592	Aplke1_GeneCatalog_proteins_20121220.aa
PpSQ1_00089_SG-dehydratase_Pseudomonas_putida_SQ1_1	Sorghum bicolor	Magnoliophyta, Plantae	Sorbi1|5058904	198-333:206.0 475-565:145.0 102-160:80.0 44-78:74.0 438-454:61.0 383-403:48.0 410-440:48.0	662	6.47e-51	390	0.6599	139	0.3564	44	565	68	590	Sorbi1_GeneModels_Sbi1_4_aa
PpSQ1_00089_SG-dehydratase_Pseudomonas_putida_SQ1_1	Pelagophyceae sp. CCMP2097 v1.0	Pelagophyceae, Ochrophyta	Pelago2097_1|479054	475-567:168.0 238-339:140.0 102-163:82.0 39-78:75.0 179-228:65.0 383-403:52.0	582	5.25e-45	368	0.6525	133	0.3614	39	567	38	564	Pelago2097_1_GeneCatalog_proteins_20160408.aa
PpSQ1_00089_SG-dehydratase_Pseudomonas_putida_SQ1_1	Arabidopsis lyrata	Magnoliophyta, Plantae	Araly1|898995	198-334:214.0 475-565:144.0 44-78:78.0 102-159:78.0 437-454:66.0 377-403:55.0 410-440:48.0	683	1.02e-53	397	0.6519	146	0.3678	44	565	86	608	Araly1_GeneModels_FilteredModels6_aa
PpSQ1_00089_SG-dehydratase_Pseudomonas_putida_SQ1_1	Nannochloropsis oceanica CCMP1779 v2.0	Eustigmatophyceae, Ochrophyta	Nanoce1779_2|534288	198-334:207.0 470-552:125.0 40-78:86.0 102-156:77.0 432-454:69.0 383-403:50.0	614	1.61e-49	358	0.6416	135	0.3771	40	552	29	542	Nanoce1779_2_GeneCatalog_proteins_20180119
PpSQ1_00089_SG-dehydratase_Pseudomonas_putida_SQ1_1	Phytophthora infestans T30-4	Oomycota, Stramenopila	Phyinf1|6096	198-334:188.0 470-522:118.0 39-78:98.0 432-454:72.0 102-156:64.0 377-403:55.0 522-565:44.0	639	4.25e-48	379	0.6359	137	0.3615	39	565	67	595	Phyinf1_GeneCatalog_proteins_20180122.aa
PpSQ1_00089_SG-dehydratase_Pseudomonas_putida_SQ1_1	Chondrus crispus Stackhouse	Florideophyceae, Rhodophyta	Chocri1|6038	475-561:177.0 259-334:118.0 98-142:85.0 38-79:84.0 176-230:75.0 380-403:70.0 432-454:56.0 406-420:41.0	706	3.87e-53	367	0.6328	147	0.4005	38	561	45	576	Chocri1_GeneCatalog_proteins_20180417.aa
PpSQ1_00089_SG-dehydratase_Pseudomonas_putida_SQ1_1	Phytophthora sojae v3.0	Oomycota, Stramenopila	Physo3|557322	198-334:183.0 470-522:118.0 39-78:100.0 432-454:72.0 102-156:64.0 377-403:55.0 524-565:42.0	634	2.53e-47	377	0.6326	136	0.3607	39	565	67	595	Physo3_GeneCatalog_proteins_20110401.aa
PpSQ1_00089_SG-dehydratase_Pseudomonas_putida_SQ1_1	Chlamydomonas reinhardtii v4.0	Chlorophyceae, Chlorophyta	Chlre4|129639	179-337:206.0 475-534:157.0 38-78:101.0 102-159:78.0 438-454:59.0 377-403:52.0 411-426:41.0	694	3.91e-60	378	0.6258	149	0.3942	38	534	73	572	Chlre4_best_proteins
PpSQ1_00089_SG-dehydratase_Pseudomonas_putida_SQ1_1	Emiliania huxleyi CCMP1516 v1.0	Coccolithophyceae, Haptophyta	Emihu1|423950	471-565:181.0 253-334:114.0 198-232:74.0 42-78:68.0 102-156:66.0 383-403:56.0 438-454:52.0	611	2.11e-44	342	0.614	132	0.386	42	565	1	556	Emihu1_reduced_proteins
PpSQ1_00089_SG-dehydratase_Pseudomonas_putida_SQ1_1	Porphyra umbilicalis isolate 4086291	Bangiophyceae, Rhodophyta	Porumb1|7855	470-541:163.0 265-334:99.0 98-160:85.0 176-233:77.0 38-79:63.0 380-400:58.0 438-454:56.0 406-420:49.0	650	1.81e-45	358	0.6099	143	0.3994	38	541	56	566	Porumb1_GeneCatalog_proteins_20180417.aa
PpSQ1_00089_SG-dehydratase_Pseudomonas_putida_SQ1_1	Scenedesmus obliquus UTEX 393	Chlorophyceae, Chlorophyta	Sobl393_1|16762	198-334:205.0 39-78:97.0 102-156:72.0	374	8.1e-32	232	0.6042	87	0.375	39	334	67	368	Sobl393_1_GeneCatalog_proteins_20200120.aa
PpSQ1_00089_SG-dehydratase_Pseudomonas_putida_SQ1_1	Guillardia theta CCMP2712	Cryptophyta, Stramenopila	Guith1|158599	198-334:181.0 471-524:133.0 38-78:91.0 102-156:68.0 432-454:68.0 383-403:47.0	588	9.82e-46	331	0.59	124	0.3746	38	524	29	517	Guith1_GeneCatalog_proteins_20101209.aa
PpSQ1_00089_SG-dehydratase_Pseudomonas_putida_SQ1_1	Phaeocystis globosa Pg-G v2.3	Prymnesiophyceae, Haptophyta	Phaglo1|20543	470-565:199.0 243-339:122.0 198-230:79.0 102-156:69.0 42-76:68.0 432-454:53.0 383-403:51.0	641	5.06e-48	360	0.5854	140	0.3889	42	565	76	614	Phaglo1_GeneCatalog_proteins_20181013.aa
PpSQ1_00089_SG-dehydratase_Pseudomonas_putida_SQ1_1	Coccomyxa sp. C-169	Trebouxiophyceae, Chlorophyta	Coc_C169_1|35014	198-334:198.0 470-533:131.0 39-78:93.0 102-156:71.0 438-454:60.0 377-403:48.0	601	9.5e-48	340	0.5842	125	0.3676	39	533	51	548	Coccomyxa_C169_v2_filtered_proteins
PpSQ1_00089_SG-dehydratase_Pseudomonas_putida_SQ1_1	Saprolegnia parasitica CBS 223.65	Oomycota, Stramenopila	Sappar1|32592	198-334:199.0 471-532:136.0 38-74:79.0 432-454:76.0 102-156:68.0 383-403:54.0	612	6.27e-49	335	0.5816	124	0.3701	38	532	48	542	Sappar1_GeneCatalog_proteins_20180131.aa
PpSQ1_00089_SG-dehydratase_Pseudomonas_putida_SQ1_1	Cyanidioschyzon merolae strain 10D	Cyanidiophyceae, Rhodophyta	Cyamer1|54334	471-522:115.0 265-348:95.0 98-156:79.0 38-82:68.0 380-405:64.0 432-454:59.0 188-229:58.0 406-421:52.0 18-41:41.0	631	4.49e-39	371	0.5815	134	0.3612	18	522	82	592	Cyamer1_GeneCatalog_proteins_20180616.aa
PpSQ1_00089_SG-dehydratase_Pseudomonas_putida_SQ1_1	Galdieria sulphuraria 074W	Cyanidiophyceae, Rhodophyta	Galsul1|5830	470-565:158.0 259-339:109.0 98-160:85.0 179-225:74.0 380-408:68.0 38-63:62.0 340-360:52.0 433-454:52.0	660	4.53e-52	385	0.5781	141	0.3662	38	565	127	665	Galsul1_GeneCatalog_proteins_20180411.aa
PpSQ1_00089_SG-dehydratase_Pseudomonas_putida_SQ1_1	Physcomitrella patens subsp patens v1.1	Bryophyta, Plantae	Phypa1_1|107059	198-334:225.0 470-533:141.0 39-78:90.0 102-160:78.0 437-454:67.0 383-403:49.0	650	9.04e-54	339	0.5765	135	0.3982	39	533	60	555	proteins.FilterdModels3
PpSQ1_00089_SG-dehydratase_Pseudomonas_putida_SQ1_1	Pavlovales sp. CCMP2436 v1.0	Pavlovophyceae, Haptophyceae	Pavlov2436_1|574316	198-334:204.0 470-534:141.0 39-78:90.0 102-156:70.0 432-454:68.0	573	1.82e-48	320	0.5755	122	0.3812	39	534	25	524	Pavlov2436_1_GeneCatalog_proteins_20160817.aa
PpSQ1_00089_SG-dehydratase_Pseudomonas_putida_SQ1_1	Ectocarpus siliculosus Ec 32	Phaeophyceae, Ochrophyta, Stramenopila	Ectsil1|28966	198-278:134.0 40-78:80.0 102-160:71.0	285	7.11e-22	179	0.5737	61	0.3408	40	278	43	285	Ectsil1_GeneCatalog_proteins_20171109.aa
PpSQ1_00089_SG-dehydratase_Pseudomonas_putida_SQ1_1	Gonium pectorale NIES-2863	Chlorophyceae, Chlorophyta	Gonpec1|13129	475-537:141.0 293-337:86.0 438-454:59.0 383-403:48.0 339-360:43.0	377	4.37e-26	168	0.5657	72	0.4286	293	537	27	268	Gonpec1_GeneCatalog_proteins_20180501.aa
PpSQ1_00089_SG-dehydratase_Pseudomonas_putida_SQ1_1	Dunaliella salina CCAP19-18	Chlorophyceae, Chlorophyta	Dunsal1|14443	198-334:203.0 475-539:156.0 38-78:98.0 102-156:76.0 438-454:59.0 383-403:48.0	640	1.34e-52	336	0.5628	131	0.3899	38	539	66	570	Dunsal1_GeneCatalog_proteins_20180508.aa
PpSQ1_00089_SG-dehydratase_Pseudomonas_putida_SQ1_1	Chrysochromulina tobin CCMP291	Coccolithophyceae, Haptophyta	Chrsp_1|179768	470-565:208.0 242-334:106.0 198-228:77.0 42-71:74.0 102-156:68.0 383-403:56.0 438-457:53.0	642	2.18e-48	346	0.5626	135	0.3902	42	565	77	614	Chrsp_1_GeneCatalog_proteins_20180813.aa
PpSQ1_00089_SG-dehydratase_Pseudomonas_putida_SQ1_1	Phytophthora capsici LT1534 v11.0	Oomycota, Stramenopila	Phyca11|541961	198-334:187.0 470-522:117.0 39-78:100.0 432-454:72.0 102-156:64.0 377-403:55.0	595	9.62e-47	335	0.5621	124	0.3701	39	522	67	551	Phyca11_filtered_proteins
PpSQ1_00089_SG-dehydratase_Pseudomonas_putida_SQ1_1	Chromochloris zofingiensis SAG 211-14	Chlorophyceae, Chlorophyta	Chrzof1|3734	198-334:199.0 475-538:148.0 39-78:92.0 102-156:73.0 438-454:60.0 377-403:51.0	623	2.57e-50	340	0.5601	132	0.3882	39	538	77	579	Chrzof1_GeneCatalog_proteins_20190731.aa
PpSQ1_00089_SG-dehydratase_Pseudomonas_putida_SQ1_1	Volvox carteri nagariensis	Chlorophyceae, Chlorophyta	Volca1|77661	198-337:205.0 475-537:152.0 38-74:103.0 102-159:78.0 438-454:59.0 383-403:48.0	645	3.46e-53	336	0.5563	137	0.4077	38	537	73	575	proteins
PpSQ1_00089_SG-dehydratase_Pseudomonas_putida_SQ1_1	Pseudo-nitzschia multiseries CLN-47	Bacillariophyceae, Stramenopila	Psemu1|254781	471-514:122.0 39-77:90.0 102-156:77.0 198-228:71.0 432-454:63.0 241-278:58.0 294-334:55.0 511-567:55.0 383-403:53.0	644	2.18e-40	349	0.5548	137	0.3926	39	567	55	592	Psemu1_GeneCatalog_proteins_20111011.aa
PpSQ1_00089_SG-dehydratase_Pseudomonas_putida_SQ1_1	Raphidocelis subcapitata NIES-35		Rapsub1|2287	198-334:205.0 475-533:115.0 38-78:95.0 102-156:75.0 438-454:60.0 383-403:47.0	597	6.66e-47	330	0.5528	126	0.3818	38	533	66	563	Rapsub1_GeneCatalog_proteins_20191119.aa
PpSQ1_00089_SG-dehydratase_Pseudomonas_putida_SQ1_1	Selaginella moellendorffii v1.0	Lycopodiopsida, Plantae	Selmo1|165632	198-334:209.0 470-533:150.0 38-78:84.0 102-156:68.0 438-454:62.0 383-403:48.0	621	5.37e-50	335	0.551	130	0.3881	38	533	79	575	Selmo1_GeneModels_FilteredModels3_aa
PpSQ1_00089_SG-dehydratase_Pseudomonas_putida_SQ1_1	Bathycoccus prasinos RCC1105	Mamiellophyceae, Chlorophyta	Batpra1|7842	198-334:202.0 471-521:114.0 39-77:79.0 102-156:68.0 437-454:61.0 383-403:49.0	573	5.63e-44	321	0.545	125	0.3894	39	521	57	543	Batpra1_GeneCatalog_proteins_20180426.aa
PpSQ1_00089_SG-dehydratase_Pseudomonas_putida_SQ1_1	Auxenochlorella protothecoides 0710	Trebouxiophyceae, Chlorophyta	Auxeprot1|2273	198-334:208.0 39-78:99.0 102-156:88.0 383-400:44.0	439	6.61e-36	250	0.5423	96	0.384	39	400	76	444	Auxeprot1_GeneCatalog_proteins_20170909.aa
PpSQ1_00089_SG-dehydratase_Pseudomonas_putida_SQ1_1	Scenedesmus obliquus EN0004 v1.0	Chlorophyceae, Chlorophyta	SceoblEN4_1|571579	198-334:205.0 475-527:117.0 39-78:97.0 102-156:72.0 438-454:60.0 383-403:59.0	610	1.09e-48	323	0.5401	132	0.4087	39	527	67	558	SceoblEN4_1_GeneCatalog_proteins_20190921.aa
PpSQ1_00089_SG-dehydratase_Pseudomonas_putida_SQ1_1	Micromonas pusilla CCMP1545	Mamiellophyceae, Chlorophyta	MicpuC3v2|1029	198-334:196.0 470-527:127.0 40-76:88.0 102-156:63.0 437-454:61.0 377-403:50.0	585	2.28e-45	332	0.5398	125	0.3765	40	527	86	575	MicpuC3v2_GeneCatalog_proteins_20131216.aa
PpSQ1_00089_SG-dehydratase_Pseudomonas_putida_SQ1_1	Asterochloris sp. Cgr/DA1pho v2.0	Trebouxiophyceae, Chlorophyta	Astpho2|9294	198-334:212.0 475-514:111.0 39-74:83.0 102-157:74.0 438-454:60.0 383-403:42.0	582	3.16e-45	307	0.5377	119	0.3876	39	514	40	518	Astpho2_GeneCatalog_proteins_20111209.aa
PpSQ1_00089_SG-dehydratase_Pseudomonas_putida_SQ1_1	Thalassiosira pseudonana CCMP 1335	Bacillariophyceae, Stramenopila	Thaps3|27997	198-278:119.0 475-514:118.0 39-74:86.0 102-156:78.0 432-454:64.0 294-334:60.0 519-565:57.0 383-403:53.0	635	2.98e-43	344	0.5375	132	0.3837	39	565	72	607	Thaps3_geneModels_FilteredModels2_aa
PpSQ1_00089_SG-dehydratase_Pseudomonas_putida_SQ1_1	Nannochloropsis gaditana B-31	Eustigmatophyceae, Ochrophyta	Nangad1|10795	198-334:201.0 470-522:112.0 40-78:94.0 432-454:69.0 102-156:68.0 383-403:47.0	591	2.92e-46	328	0.5325	126	0.3841	40	522	87	570	Nangad1_GeneCatalog_proteins_20180307.aa
PpSQ1_00089_SG-dehydratase_Pseudomonas_putida_SQ1_1	Ostreococcus tauri RCC1115 v1.0	Mamiellophyceae, Chlorophyta	Ostta1115_2|78792	198-334:201.0 470-521:121.0 39-77:80.0 102-156:77.0 437-454:61.0	540	2.89e-44	301	0.5309	115	0.3821	39	521	36	521	Ostta1115_2_GeneCatalog_proteins_20170131.aa
PpSQ1_00089_SG-dehydratase_Pseudomonas_putida_SQ1_1	Ostreococcus lucimarinus	Mamiellophyceae, Chlorophyta	Ost9901_3|34354	198-334:198.0 471-521:120.0 39-77:80.0 102-156:74.0 437-454:61.0	533	2.09e-43	300	0.5291	115	0.3833	39	521	36	521	Olucimarinus_FM_aa
PpSQ1_00089_SG-dehydratase_Pseudomonas_putida_SQ1_1	Micromonas commoda NOUM17 (RCC 299)	Mamiellophyceae, Chlorophyta	MicpuN3v2|852	198-334:201.0 471-533:120.0 40-76:78.0 102-156:70.0 437-454:58.0 383-403:45.0	572	1.42e-43	331	0.5288	121	0.3656	40	533	97	592	MicpuN3v2_GeneCatalog_proteins_20131216.aa
PpSQ1_00089_SG-dehydratase_Pseudomonas_putida_SQ1_1	Ostreococcus sp. RCC809	Mamiellophyceae, Chlorophyta	OstRCC809_2|33384	198-334:204.0 471-521:122.0 40-77:81.0 102-156:76.0 437-454:61.0	544	7.46e-45	299	0.5273	117	0.3913	40	521	37	521	OstRCC809FM3proteins
PpSQ1_00089_SG-dehydratase_Pseudomonas_putida_SQ1_1	Aurantiochytrium limacinum ATCC MYA-1381	Thraustochytriales, Stramenopila	Aurli1|8387	198-334:187.0 475-565:164.0 102-156:71.0 39-78:63.0 438-454:58.0 377-403:45.0	588	2.06e-45	367	0.525	133	0.3624	39	565	65	698	Aurli1_GeneCatalog_proteins_20120618.aa
PpSQ1_00089_SG-dehydratase_Pseudomonas_putida_SQ1_1	Picochlorum sp. SENEW3	Trebouxiophyceae, Chlorophyta	Picsp_1|2610	198-334:200.0 471-527:117.0 102-156:80.0 42-78:77.0 438-454:59.0 377-403:50.0	583	2.98e-45	330	0.5222	124	0.3758	42	527	102	589	Picsp_1_GeneCatalog_proteins_20170909.aa
PpSQ1_00089_SG-dehydratase_Pseudomonas_putida_SQ1_1	Phaeocystis antarctica CCMP1374 v2.2	Prymnesiophyceae, Haptophyta	Phaant1|21577	470-539:184.0 179-235:91.0 98-156:66.0 438-454:61.0 380-403:60.0 235-278:49.0 296-336:48.0	559	2.88e-37	312	0.5174	125	0.4006	98	539	112	576	Phaant1_GeneCatalog_proteins_20181014.aa
PpSQ1_00089_SG-dehydratase_Pseudomonas_putida_SQ1_1	Thalassiosira oceanica CCMP1005	Bacillariophyceae, Stramenopila	Thaoce1|90218	198-278:114.0 39-74:86.0 102-156:76.0	276	1.41e-18	172	0.515	61	0.3547	39	278	36	281	Thaoce1_GeneCatalog_proteins_20171026.aa
PpSQ1_00089_SG-dehydratase_Pseudomonas_putida_SQ1_1	Symbiochloris reticulata Spain extracted metagenome v1.0	Trebouxiophyceae, Chlorophyta	SymretSp1|755982	198-334:228.0 475-514:121.0 39-78:76.0 102-157:70.0 438-457:60.0 381-403:47.0	602	9.83e-48	316	0.5138	125	0.3956	39	514	84	562	SymretSp1_GeneCatalog_proteins_20171013.aa
PpSQ1_00089_SG-dehydratase_Pseudomonas_putida_SQ1_1	Symbiochloris reticulata Africa extracted metagenome v1.0	Trebouxiophyceae, Chlorophyta	SymretAf1|576821	198-334:228.0 475-514:121.0 39-78:76.0 102-157:70.0 438-457:60.0 381-403:47.0	602	1.03e-47	316	0.5138	125	0.3956	39	514	84	562	SymretAf1_GeneCatalog_proteins_20180322.aa
PpSQ1_00089_SG-dehydratase_Pseudomonas_putida_SQ1_1	Symbiochloris reticulata Switzerland extracted metagenome v1.0	Trebouxiophyceae, Chlorophyta	SymretSw1|577037	198-334:228.0 475-514:121.0 39-78:76.0 102-157:70.0 438-457:60.0 381-403:47.0	602	1.04e-47	316	0.5138	125	0.3956	39	514	84	562	SymretSw1_GeneCatalog_proteins_20180321.aa
PpSQ1_00089_SG-dehydratase_Pseudomonas_putida_SQ1_1	Symbiochloris reticulata Spain reference genome v1.0	Trebouxiophyceae, Chlorophyta	Dicre1|760945	198-334:228.0 475-514:121.0 39-78:76.0 102-157:70.0 438-457:60.0 381-403:47.0	602	9.67e-48	316	0.5138	125	0.3956	39	514	84	562	Dicre1_GeneCatalog_proteins_20171101.aa
PpSQ1_00089_SG-dehydratase_Pseudomonas_putida_SQ1_1	Symbiochloris reticulata Scotland extracted metagenome v1.0	Trebouxiophyceae, Chlorophyta	SymretSc1|323146	198-334:228.0 475-514:121.0 39-78:76.0 102-157:70.0 438-457:60.0 381-403:47.0	602	1.01e-47	316	0.5138	125	0.3956	39	514	84	562	SymretSc1_GeneCatalog_proteins_20180314.aa
PpSQ1_00089_SG-dehydratase_Pseudomonas_putida_SQ1_1	Monoraphidium neglectum SAG 48.87	Chlorophyceae, Chlorophyta	Monneg1|8242	38-78:91.0 102-156:73.0	164	6.6e-10	96	0.5134	35	0.3646	38	156	8	131	Monneg1_GeneCatalog_proteins_20170920.aa
PpSQ1_00089_SG-dehydratase_Pseudomonas_putida_SQ1_1	Phaeodactylum tricornutum CCAP 1055/1 v2.0	Bacillariophyceae, Stramenopila	Phatr2|20547	475-517:122.0 198-278:112.0 39-74:93.0 102-157:76.0 432-454:66.0 294-334:61.0 383-403:53.0 511-538:43.0	626	3.9e-42	329	0.5093	129	0.3921	39	538	74	580	Phatr2_geneModels_FilteredModels2_aa
PpSQ1_00089_SG-dehydratase_Pseudomonas_putida_SQ1_1	Cryptophyceae sp. CCMP2293 v1.0	Cryptophyta, Stramenopila	Crypto2293_1|3265297	471-524:127.0 432-454:71.0	198	2.19e-14	77	0.5066	37	0.4805	432	524	17	108	Crypto2293_1_GeneCatalog_proteins_20160903.aa
PpSQ1_00089_SG-dehydratase_Pseudomonas_putida_SQ1_1	Fragilariopsis cylindrus CCMP 1102	Bacillariophyceae, Stramenopila	Fracy1|178586	471-514:121.0 198-278:114.0 39-74:85.0 102-157:79.0 432-454:68.0 383-403:53.0 294-334:51.0 511-533:41.0	612	4.22e-40	325	0.5008	125	0.3846	39	533	71	574	Fracy1_GeneModels_FilteredModels2_aa
PpSQ1_00089_SG-dehydratase_Pseudomonas_putida_SQ1_1	Ostreococcus tauri RCC4221 v3.0		Ostta4221_3|73549	198-334:201.0 470-521:121.0 39-77:80.0 102-156:77.0 437-454:61.0	540	3.82e-44	301	0.4959	115	0.3821	39	521	76	561	Ostta4221_3_GeneCatalog_proteins_20161028.aa
PpSQ1_00089_SG-dehydratase_Pseudomonas_putida_SQ1_1	Reticulomyxa filosa		Retfil1|30674	240-334:119.0 475-533:97.0 438-454:62.0	278	1.05e-18	171	0.4453	63	0.3684	240	533	33	349	Retfil1_GeneCatalog_proteins_20180531.aa
PpSQ1_00089_SG-dehydratase_Pseudomonas_putida_SQ1_1	Aureococcus anophagefferens clone 1984		jgi|Auran1|54952	475-517:121.0 198-278:119.0 102-157:80.0 432-454:62.0 42-78:57.0 383-403:57.0 296-334:55.0	551	3.9e-36	300	0.4292	109	0.3633	42	517	81	561	Aureococcus_anophagefferens.proteinsFM3
PpSQ1_00089_SG-dehydratase_Pseudomonas_putida_SQ1_1	Symbiodinium microadriaticum CCMP2467		Symmic1|30065	198-334:180.0 475-565:163.0 102-157:82.0 377-403:65.0 38-74:62.0 439-454:47.0	599	6.88e-45	364	0.2855	125	0.3434	38	565	744	1274	Symmic1_GeneCatalog_proteins_20180603.aa
PpSQ1_00089_SG-dehydratase_Pseudomonas_putida_SQ1_1	Chlorella sp. NC64A		ChlNC64A_1|58991	198-339:209.0 471-533:120.0 102-156:71.0 437-454:60.0 377-403:48.0	508	9.46e-39	305	0.2768	109	0.3574	102	533	452	882	Chlorella_NC64A_filtered_proteins
Query Name	Organism	Phylogenetic affinity	Hit	Hsp	Score	EValue	Alignment Length	% Hit Coverage	Hit Identity	% Hit Identity	Query Start	Query End	Hit Start	Hit End	Dataset
PpSQ1_00090_SQ-dehydrogenase_Pseudomonas_putida_SQ1_1	Chrysochromulina tobin CCMP291	Coccolithophyceae, Haptophyta	Chrsp_1|181869	140-210:100.0 12-60:64.0 67-143:60.0 230-258:51.0	275	2.95e-17	226	0.8692	69	0.3053	12	258	5	258	Chrsp_1_GeneCatalog_proteins_20180813.aa
PpSQ1_00090_SQ-dehydrogenase_Pseudomonas_putida_SQ1_1	Auxenochlorella protothecoides 0710	Trebouxiophyceae, Chlorophyta	Auxeprot1|1136	135-196:107.0 67-143:94.0 12-72:83.0 227-256:52.0	336	7.22e-26	230	0.8679	77	0.3348	12	256	4	247	Auxeprot1_GeneCatalog_proteins_20170909.aa
PpSQ1_00090_SQ-dehydrogenase_Pseudomonas_putida_SQ1_1	Symbiochloris reticulata Switzerland extracted metagenome v1.0	Trebouxiophyceae, Chlorophyta	SymretSw1|577247	67-162:115.0 12-47:72.0 228-256:50.0 140-207:106.0	343	2.27e-15	229	0.8545	79	0.345	12	256	8	255	SymretSw1_GeneCatalog_proteins_20180321.aa
PpSQ1_00090_SQ-dehydrogenase_Pseudomonas_putida_SQ1_1	Symbiochloris reticulata Spain extracted metagenome v1.0	Trebouxiophyceae, Chlorophyta	SymretSp1|809077	67-162:115.0 12-47:72.0 228-256:50.0 140-207:106.0	343	2.16e-15	229	0.8545	79	0.345	12	256	8	255	SymretSp1_GeneCatalog_proteins_20171013.aa
PpSQ1_00090_SQ-dehydrogenase_Pseudomonas_putida_SQ1_1	Symbiochloris reticulata Scotland extracted metagenome v1.0	Trebouxiophyceae, Chlorophyta	SymretSc1|211725	67-162:115.0 12-47:72.0 228-256:50.0 140-207:106.0	343	2.21e-15	229	0.8545	79	0.345	12	256	8	255	SymretSc1_GeneCatalog_proteins_20180314.aa
PpSQ1_00090_SQ-dehydrogenase_Pseudomonas_putida_SQ1_1	Symbiochloris reticulata Spain reference genome v1.0	Trebouxiophyceae, Chlorophyta	Dicre1|814902	67-162:115.0 12-47:72.0 228-256:50.0 140-207:106.0	343	2.12e-15	229	0.8545	79	0.345	12	256	8	255	Dicre1_GeneCatalog_proteins_20171101.aa
PpSQ1_00090_SQ-dehydrogenase_Pseudomonas_putida_SQ1_1	Populus trichocarpa v1.1	Magnoliophyta, Plantae	eugene3.00061411	116-216:119.0 12-62:111.0 226-260:86.0 60-100:76.0	392	1.01e-32	228	0.8444	89	0.3904	12	260	10	259	AllJamboreeModels.named_proteins
PpSQ1_00090_SQ-dehydrogenase_Pseudomonas_putida_SQ1_1	Saprolegnia parasitica CBS 223.65	Oomycota, Stramenopila	Sappar1|26550	57-195:179.0 11-46:68.0 229-260:56.0	303	4.81e-25	207	0.8381	74	0.3575	11	260	4	247	Sappar1_GeneCatalog_proteins_20180131.aa
PpSQ1_00090_SQ-dehydrogenase_Pseudomonas_putida_SQ1_1	Scenedesmus obliquus EN0004 v1.0	Chlorophyceae, Chlorophyta	SceoblEN4_1|346510	140-196:111.0 59-143:95.0 12-58:89.0 227-256:56.0	351	1.67e-27	219	0.8295	74	0.3379	12	256	7	250	SceoblEN4_1_GeneCatalog_proteins_20190921.aa
PpSQ1_00090_SQ-dehydrogenase_Pseudomonas_putida_SQ1_1	Galdieria sulphuraria 074W	Cyanidiophyceae, Rhodophyta	Galsul1|1927	66-204:203.0 12-54:65.0 230-258:51.0	319	1.12e-27	211	0.8242	68	0.3223	12	258	10	254	Galsul1_GeneCatalog_proteins_20180411.aa
PpSQ1_00090_SQ-dehydrogenase_Pseudomonas_putida_SQ1_1	Chlorella sp. NC64A	Trebouxiophyceae, Chlorophyta	ChlNC64A_1|34782	140-196:116.0 57-143:114.0 11-50:84.0 227-256:55.0	369	4.15e-30	214	0.8045	79	0.3692	11	256	6	250	Chlorella_NC64A_filtered_proteins
PpSQ1_00090_SQ-dehydrogenase_Pseudomonas_putida_SQ1_1	Emiliania huxleyi CCMP1516 v1.0	Coccolithophyceae, Haptophyta	Emihu1|76705	65-215:230.0 11-43:81.0 227-260:53.0	364	2.9e-33	218	0.8015	82	0.3761	11	260	8	258	Emihu1_reduced_proteins
PpSQ1_00090_SQ-dehydrogenase_Pseudomonas_putida_SQ1_1	Scenedesmus obliquus UTEX 393	Chlorophyceae, Chlorophyta	Sobl393_1|11830	140-196:108.0 67-143:92.0 12-58:89.0 227-256:56.0	345	1.32e-26	211	0.7992	72	0.3412	12	256	7	250	Sobl393_1_GeneCatalog_proteins_20200120.aa
PpSQ1_00090_SQ-dehydrogenase_Pseudomonas_putida_SQ1_1	Chromochloris zofingiensis SAG 211-14	Chlorophyceae, Chlorophyta	Chrzof1|9572	12-97:190.0 140-259:174.0	364	3.06e-37	206	0.7863	76	0.3689	12	259	6	261	Chrzof1_GeneCatalog_proteins_20190731.aa
PpSQ1_00090_SQ-dehydrogenase_Pseudomonas_putida_SQ1_1	Porphyra umbilicalis isolate 4086291	Bangiophyceae, Rhodophyta	Porumb1|6326	102-202:154.0 12-52:71.0 68-109:70.0 228-258:41.0	336	1.56e-25	215	0.7734	79	0.3674	12	258	21	276	Porumb1_GeneCatalog_proteins_20180417.aa
PpSQ1_00090_SQ-dehydrogenase_Pseudomonas_putida_SQ1_1	Phytophthora cinnamomi var cinnamomi v1.0	Oomycota, Stramenopila	Phyci1|88092	92-201:188.0 228-259:62.0 16-63:59.0	309	7.46e-26	190	0.7692	72	0.3789	16	259	4	247	Phyci1_GeneCatalog_proteins_20120612.aa
PpSQ1_00090_SQ-dehydrogenase_Pseudomonas_putida_SQ1_1	Symbiochloris reticulata Africa extracted metagenome v1.0		SymretAf1|567878	140-196:116.0 67-148:80.0 12-45:63.0 230-258:59.0	318	3.2e-23	202	0.7594	71	0.3515	12	258	1	255	SymretAf1_GeneCatalog_proteins_20180322.aa
PpSQ1_00090_SQ-dehydrogenase_Pseudomonas_putida_SQ1_1	Asterochloris sp. Cgr/DA1pho v2.0	Trebouxiophyceae, Chlorophyta	Astpho2|5145	140-203:105.0 12-58:81.0 59-96:66.0 227-256:54.0 112-137:52.0	358	1.21e-24	205	0.7593	77	0.3756	12	256	10	258	Astpho2_GeneCatalog_proteins_20111209.aa
PpSQ1_00090_SQ-dehydrogenase_Pseudomonas_putida_SQ1_1	Sorghum bicolor	Magnoliophyta, Plantae	Sorbi1|5047793	126-211:141.0 12-60:101.0 226-258:72.0 67-96:63.0	377	1.05e-30	198	0.7388	81	0.4091	12	258	6	256	Sorbi1_GeneModels_Sbi1_4_aa
PpSQ1_00090_SQ-dehydrogenase_Pseudomonas_putida_SQ1_1	Schizochytrium aggregatum ATCC 28209	Labyrinthulomycetes, Stramenopila	Schag1|44774	140-195:102.0 18-52:78.0 230-258:66.0 67-140:52.0	298	1.57e-20	194	0.7159	72	0.3711	18	258	11	257	Schag1_GeneCatalog_proteins_20121220.aa
PpSQ1_00090_SQ-dehydrogenase_Pseudomonas_putida_SQ1_1	Bigelowiella natans CCMP2755	Chlorarachniophyceae, Cercozoa	Bigna1|47937	116-195:150.0 11-62:97.0 68-96:62.0 230-258:50.0	359	1.97e-28	190	0.7116	70	0.3684	11	258	11	264	Bigna1_filtered_proteins
PpSQ1_00090_SQ-dehydrogenase_Pseudomonas_putida_SQ1_1	Naegleria gruberi v1.0	Heterolobosea, Percolozoa	Naegr1|52733	139-195:111.0 12-49:83.0 47-97:70.0 230-256:55.0 94-129:46.0	365	2.46e-25	209	0.7013	81	0.3876	12	256	51	294	Naegr1_best_proteins
PpSQ1_00090_SQ-dehydrogenase_Pseudomonas_putida_SQ1_1	Phaeodactylum tricornutum CCAP 1055/1 v2.0	Bacillariophyceae, Stramenopila	Phatr2|5780	127-195:132.0 62-96:81.0 12-42:69.0	282	1.9e-22	135	0.6959	59	0.437	12	195	7	194	Phatr2_geneModels_FilteredModels2_aa
PpSQ1_00090_SQ-dehydrogenase_Pseudomonas_putida_SQ1_1	Raphidocelis subcapitata NIES-35		Rapsub1|6878	141-205:110.0 12-47:86.0 47-97:60.0 104-132:46.0 229-257:41.0	343	1.99e-22	210	0.6954	80	0.381	12	257	55	298	Rapsub1_GeneCatalog_proteins_20191119.aa
PpSQ1_00090_SQ-dehydrogenase_Pseudomonas_putida_SQ1_1	Trypanosoma brucei brucei TREU927	Kinetoplastea, Euglenozoa	Trybru1|3612	59-195:182.0 218-260:47.0	229	1.72e-19	180	0.6923	55	0.3056	59	260	53	260	Trybru1_GeneCatalog_proteins_20180531.aa
PpSQ1_00090_SQ-dehydrogenase_Pseudomonas_putida_SQ1_1	Fragilariopsis cylindrus CCMP 1102	Bacillariophyceae, Stramenopila	Fracy1|141781	138-210:90.0 11-32:49.0 228-260:44.0 92-125:43.0 67-96:42.0	268	1.22e-11	192	0.6906	64	0.3333	11	260	3	275	Fracy1_GeneModels_FilteredModels2_aa
PpSQ1_00090_SQ-dehydrogenase_Pseudomonas_putida_SQ1_1	Arabidopsis lyrata	Magnoliophyta, Plantae	Araly1|484451	12-96:174.0 103-195:140.0 230-258:82.0	396	1.22e-37	207	0.69	82	0.3961	12	258	36	290	Araly1_GeneModels_FilteredModels6_aa
PpSQ1_00090_SQ-dehydrogenase_Pseudomonas_putida_SQ1_1	Aplanochytrium kerguelense PBS07 v1.0	Labyrinthulomycetes, Stramenopila	Aplke1|91639	12-98:151.0 116-195:128.0 230-259:80.0	359	7.57e-32	197	0.684	76	0.3858	12	259	4	262	Aplke1_GeneCatalog_proteins_20121220.aa
PpSQ1_00090_SQ-dehydrogenase_Pseudomonas_putida_SQ1_1	Phytophthora capsici LT1534 v11.0	Oomycota, Stramenopila	Phyca11|124185	113-201:186.0 228-259:69.0 16-63:59.0	314	8.77e-26	169	0.6815	69	0.4083	16	259	5	248	Phyca11_filtered_proteins
PpSQ1_00090_SQ-dehydrogenase_Pseudomonas_putida_SQ1_1	Trichomonas vaginalis G3	Trichomonadea, Metamonada	Trivag1|10719	106-195:134.0 65-96:78.0 15-63:56.0	268	5.45e-20	171	0.6786	59	0.345	15	195	4	188	Trivag1_GeneCatalog_proteins_20180531.aa
PpSQ1_00090_SQ-dehydrogenase_Pseudomonas_putida_SQ1_1	Guillardia theta CCMP2712	Cryptophyta, Stramenopila	Guith1|64987	142-196:122.0 108-136:57.0 11-41:55.0 230-249:52.0 68-96:50.0	336	2.21e-21	164	0.664	67	0.4085	11	249	4	245	Guith1_GeneCatalog_proteins_20101209.aa
PpSQ1_00090_SQ-dehydrogenase_Pseudomonas_putida_SQ1_1	Cyanidioschyzon merolae strain 10D	Cyanidiophyceae, Rhodophyta	Cyamer1|56317	110-149:82.0 160-195:79.0 12-49:60.0 68-96:55.0 230-256:52.0	328	6.38e-21	170	0.6615	65	0.3824	12	256	8	253	Cyamer1_GeneCatalog_proteins_20180616.aa
PpSQ1_00090_SQ-dehydrogenase_Pseudomonas_putida_SQ1_1	Pelagophyceae sp. CCMP2097 v1.0	Pelagophyceae, Ochrophyta	Pelago2097_1|477135	140-196:112.0 81-138:94.0 15-41:60.0 230-259:43.0	309	8.88e-22	172	0.654	68	0.3953	15	259	20	258	Pelago2097_1_GeneCatalog_proteins_20160408.aa
PpSQ1_00090_SQ-dehydrogenase_Pseudomonas_putida_SQ1_1	Cryptophyceae sp. CCMP2293 v1.0	Cryptophyta, Stramenopila	Crypto2293_1|1864813	134-195:116.0 222-259:71.0 12-41:65.0 59-96:57.0	309	8.26e-22	168	0.6512	70	0.4167	12	259	8	255	Crypto2293_1_GeneCatalog_proteins_20160903.aa
PpSQ1_00090_SQ-dehydrogenase_Pseudomonas_putida_SQ1_1	Pavlovales sp. CCMP2436 v1.0	Pavlovophyceae, Haptophyceae	Pavlov2436_1|1007947	58-195:168.0 11-41:79.0 230-259:43.0	290	2.21e-23	199	0.6482	67	0.3367	11	259	62	301	Pavlov2436_1_GeneCatalog_proteins_20160817.aa
PpSQ1_00090_SQ-dehydrogenase_Pseudomonas_putida_SQ1_1	Physcomitrella patens subsp patens v1.1	Bryophyta, Plantae	Phypa1_1|202254	13-96:156.0 103-195:122.0 226-259:58.0	336	2.21e-29	211	0.6413	77	0.3649	13	259	58	309	proteins.FilterdModels3
PpSQ1_00090_SQ-dehydrogenase_Pseudomonas_putida_SQ1_1	Picochlorum sp. SENEW3	Trebouxiophyceae, Chlorophyta	Picsp_1|5724	58-201:215.0 7-42:55.0 247-259:41.0	311	2.05e-25	193	0.6412	64	0.3316	7	259	50	300	Picsp_1_GeneCatalog_proteins_20170909.aa
PpSQ1_00090_SQ-dehydrogenase_Pseudomonas_putida_SQ1_1	Phytophthora infestans T30-4	Oomycota, Stramenopila	Phyinf1|11886	227-258:87.0 158-196:79.0 110-153:71.0 12-40:61.0 53-96:53.0	351	1.69e-23	188	0.633	74	0.3936	12	258	8	278	Phyinf1_GeneCatalog_proteins_20180122.aa
PpSQ1_00090_SQ-dehydrogenase_Pseudomonas_putida_SQ1_1	Paramecium tetraurelia d4_2	Ciliophora, Oligohymenophorea	Partet1|4761216	61-147:112.0 162-193:80.0 230-256:65.0 12-41:53.0	310	1.43e-21	176	0.6286	69	0.392	12	256	10	257	Partet1_GeneCatalog_proteins_20191116.aa
PpSQ1_00090_SQ-dehydrogenase_Pseudomonas_putida_SQ1_1	Ostreococcus sp. RCC809	Mamiellophyceae, Chlorophyta	OstRCC809_2|28776	133-196:125.0 57-137:75.0 16-41:47.0	247	7.06e-18	171	0.6264	54	0.3158	16	196	30	216	OstRCC809FM3proteins
PpSQ1_00090_SQ-dehydrogenase_Pseudomonas_putida_SQ1_1	Tetrahymena thermophila SB210	Ciliophora, Oligohymenophorea	Tetthe1|3318947	163-193:101.0 67-147:84.0 229-256:67.0 12-44:65.0	317	1.6e-22	173	0.6223	71	0.4104	12	256	10	255	Tetthe1_GeneCatalog_proteins_20191114.aa
PpSQ1_00090_SQ-dehydrogenase_Pseudomonas_putida_SQ1_1	Phytophthora sojae v3.0	Oomycota, Stramenopila	Physo3|353512	227-258:87.0 158-196:79.0 110-153:72.0 12-40:61.0 68-96:46.0	345	1.39e-22	173	0.6135	72	0.4162	12	258	8	263	Physo3_GeneCatalog_proteins_20110401.aa
PpSQ1_00090_SQ-dehydrogenase_Pseudomonas_putida_SQ1_1	Aurantiochytrium limacinum ATCC MYA-1381	Thraustochytriales, Stramenopila	Aurli1|81423	158-195:79.0 110-147:76.0 227-258:69.0 62-96:58.0 10-40:56.0	338	7.92e-22	174	0.6127	70	0.4023	10	258	13	265	Aurli1_GeneCatalog_proteins_20120618.aa
PpSQ1_00090_SQ-dehydrogenase_Pseudomonas_putida_SQ1_1	Ostreococcus tauri RCC4221 v3.0	Mamiellophyceae, Chlorophyta	Ostta4221_3|69241	133-196:127.0 57-137:81.0 16-41:41.0	249	4.26e-18	171	0.6064	54	0.3158	16	196	39	225	Ostta4221_3_GeneCatalog_proteins_20161028.aa
PpSQ1_00090_SQ-dehydrogenase_Pseudomonas_putida_SQ1_1	Ostreococcus tauri RCC1115 v1.0	Mamiellophyceae, Chlorophyta	Ostta1115_2|201620	133-196:127.0 57-137:81.0 16-41:41.0	249	4.28e-18	171	0.6064	54	0.3158	16	196	39	225	Ostta1115_2_GeneCatalog_proteins_20170131.aa
PpSQ1_00090_SQ-dehydrogenase_Pseudomonas_putida_SQ1_1	Dunaliella salina CCAP19-18	Chlorophyceae, Chlorophyta	Dunsal1|7103	59-201:209.0 16-41:59.0	268	1.29e-24	169	0.6036	56	0.3314	16	201	39	228	Dunsal1_GeneCatalog_proteins_20180508.aa
PpSQ1_00090_SQ-dehydrogenase_Pseudomonas_putida_SQ1_1	Aureococcus anophagefferens clone 1984	Pelagophyceae, Ochrophyta, Stramenopila	jgi|Auran1|23580	112-196:166.0 57-96:67.0 15-41:50.0	283	1.79e-22	152	0.6032	56	0.3684	15	196	6	191	Aureococcus_anophagefferens.proteinsFM3
PpSQ1_00090_SQ-dehydrogenase_Pseudomonas_putida_SQ1_1	Pseudo-nitzschia multiseries CLN-47	Bacillariophyceae, Stramenopila	Psemu1|207370	141-195:88.0 45-97:82.0 12-41:69.0 104-139:60.0	299	1.73e-20	174	0.6021	65	0.3736	12	195	44	230	Psemu1_GeneCatalog_proteins_20111011.aa
PpSQ1_00090_SQ-dehydrogenase_Pseudomonas_putida_SQ1_1	Nannochloropsis gaditana B-31	Eustigmatophyceae, Ochrophyta	Nangad1|3137	141-196:135.0 15-58:89.0 68-98:62.0 229-258:52.0	338	7.93e-25	161	0.5919	69	0.4286	15	258	9	270	Nangad1_GeneCatalog_proteins_20180307.aa
PpSQ1_00090_SQ-dehydrogenase_Pseudomonas_putida_SQ1_1	Gonium pectorale NIES-2863	Chlorophyceae, Chlorophyta	Gonpec1|16137	140-196:116.0 12-60:80.0 76-134:72.0	268	2.61e-20	165	0.5851	57	0.3455	12	196	13	203	Gonpec1_GeneCatalog_proteins_20180501.aa
PpSQ1_00090_SQ-dehydrogenase_Pseudomonas_putida_SQ1_1	Micromonas commoda NOUM17 (RCC 299)	Mamiellophyceae, Chlorophyta	MicpuN3v2|4417	15-60:80.0 91-134:51.0 176-201:51.0 230-256:46.0 160-178:45.0	273	2.16e-13	162	0.5848	61	0.3765	15	256	21	272	MicpuN3v2_GeneCatalog_proteins_20131216.aa
PpSQ1_00090_SQ-dehydrogenase_Pseudomonas_putida_SQ1_1	Nannochloropsis oceanica CCMP1779 v2.0	Eustigmatophyceae, Ochrophyta	Nanoce1779_2|602366	141-196:128.0 15-58:90.0 68-98:58.0 229-258:52.0	328	1.92e-23	161	0.5791	69	0.4286	15	258	10	276	Nanoce1779_2_GeneCatalog_proteins_20180119
PpSQ1_00090_SQ-dehydrogenase_Pseudomonas_putida_SQ1_1	Phaeocystis globosa Pg-G v2.3	Prymnesiophyceae, Haptophyta	Phaglo1|30995	68-196:209.0 12-41:55.0 228-258:55.0	319	4.98e-27	190	0.5605	73	0.3842	12	258	69	313	Phaglo1_GeneCatalog_proteins_20181013.aa
PpSQ1_00090_SQ-dehydrogenase_Pseudomonas_putida_SQ1_1	Ochromonadaceae sp. CCMP2298 v1.0	Synurophyceae, Ochrophyta, Stramenopila	Ochro2298_1|325927	10-96:133.0 140-195:111.0	244	1.03e-20	143	0.5586	54	0.3776	10	195	3	198	Ochro2298_1_GeneCatalog_proteins_20160817.aa
PpSQ1_00090_SQ-dehydrogenase_Pseudomonas_putida_SQ1_1	Selaginella moellendorffii v1.0	Lycopodiopsida, Plantae	Selmo1|416905	87-196:132.0 11-41:70.0 215-259:42.0 101-196:109.0 11-41:67.0	420	2.19e-15	313	0.5579	96	0.3067	11	259	9	553	Selmo1_GeneModels_FilteredModels3_aa
PpSQ1_00090_SQ-dehydrogenase_Pseudomonas_putida_SQ1_1	Blastocystis hominis Singapore isolate B (sub-type 7)	Blastocystae, Stramenopila	Blahom1|5649	136-195:120.0 14-43:82.0 64-96:64.0 218-241:54.0	320	7.91e-24	147	0.5547	63	0.4286	14	241	8	238	Blahom1_GeneCatalog_proteins_20180131.aa
PpSQ1_00090_SQ-dehydrogenase_Pseudomonas_putida_SQ1_1	Ectocarpus siliculosus Ec 32	Phaeophyceae, Ochrophyta, Stramenopila	Ectsil1|16580	139-196:123.0 68-96:77.0 11-42:67.0 112-136:57.0	324	9.17e-24	144	0.5538	66	0.4583	11	196	9	199	Ectsil1_GeneCatalog_proteins_20171109.aa
PpSQ1_00090_SQ-dehydrogenase_Pseudomonas_putida_SQ1_1	Micromonas pusilla CCMP1545	Mamiellophyceae, Chlorophyta	MicpuC3v2|4863	140-196:114.0 48-137:88.0 16-41:50.0	252	2.56e-18	173	0.5475	55	0.3179	16	196	73	259	MicpuC3v2_GeneCatalog_proteins_20131216.aa
PpSQ1_00090_SQ-dehydrogenase_Pseudomonas_putida_SQ1_1	Bathycoccus prasinos RCC1105	Mamiellophyceae, Chlorophyta	Batpra1|215	133-196:120.0 57-137:76.0 16-41:51.0	247	9.2e-18	171	0.5394	55	0.3216	16	196	74	260	Batpra1_GeneCatalog_proteins_20180426.aa
PpSQ1_00090_SQ-dehydrogenase_Pseudomonas_putida_SQ1_1	Plasmodium falciparum 3D7		Plafal1|9705	68-199:187.0 230-258:67.0	254	6.01e-23	161	0.5349	54	0.3354	68	258	117	300	Plafal1_GeneCatalog_proteins_20180530.aa
PpSQ1_00090_SQ-dehydrogenase_Pseudomonas_putida_SQ1_1	Thalassiosira pseudonana CCMP 1335	Bacillariophyceae, Stramenopila	Thaps3|264109	142-193:119.0 15-50:59.0 67-96:55.0 237-254:51.0	284	1.32e-17	136	0.5333	56	0.4118	15	254	4	254	Thaps3_geneModels_FilteredModels2_aa
PpSQ1_00090_SQ-dehydrogenase_Pseudomonas_putida_SQ1_1	Volvox carteri nagariensis	Chlorophyceae, Chlorophyta	Volca1|79385	57-201:223.0 16-42:66.0	289	1.82e-27	172	0.5292	62	0.3605	16	201	84	273	proteins
PpSQ1_00090_SQ-dehydrogenase_Pseudomonas_putida_SQ1_1	Ostreococcus lucimarinus	Mamiellophyceae, Chlorophyta	Ost9901_3|34089	83-190:114.0 11-41:66.0	180	2.92e-12	139	0.5187	40	0.2878	11	190	13	196	Olucimarinus_FM_aa
PpSQ1_00090_SQ-dehydrogenase_Pseudomonas_putida_SQ1_1	Thalassiosira oceanica CCMP1005	Bacillariophyceae, Stramenopila	Thaoce1|86869	141-177:84.0 237-258:59.0 15-50:45.0 67-96:45.0 176-193:44.0	277	1.39e-12	143	0.5053	56	0.3916	15	258	9	278	Thaoce1_GeneCatalog_proteins_20171026.aa
PpSQ1_00090_SQ-dehydrogenase_Pseudomonas_putida_SQ1_1	Chondrus crispus Stackhouse		Chocri1|6224	141-201:93.0 62-104:79.0 235-259:48.0	220	3.2e-14	129	0.4831	50	0.3876	62	259	65	259	Chocri1_GeneCatalog_proteins_20180417.aa
PpSQ1_00090_SQ-dehydrogenase_Pseudomonas_putida_SQ1_1	Monoraphidium neglectum SAG 48.87		Monneg1|10389	137-195:98.0 12-49:86.0 77-103:57.0 236-256:45.0	286	1.43e-17	145	0.4589	63	0.4345	12	256	48	311	Monneg1_GeneCatalog_proteins_20170920.aa
PpSQ1_00090_SQ-dehydrogenase_Pseudomonas_putida_SQ1_1	Toxoplasma gondii ME49		Toxgon1|2734	68-201:203.0 227-257:60.0	263	5.57e-24	165	0.4388	56	0.3394	68	257	189	371	Toxgon1_GeneCatalog_proteins_20180601.aa
PpSQ1_00090_SQ-dehydrogenase_Pseudomonas_putida_SQ1_1	Coccomyxa sp. C-169		Coc_C169_1|55647	57-149:118.0 158-195:80.0 236-256:54.0 12-83:104.0	356	1.86e-18	224	0.4164	78	0.3482	12	256	296	534	Coccomyxa_C169_v2_filtered_proteins
PpSQ1_00090_SQ-dehydrogenase_Pseudomonas_putida_SQ1_1	Oxytricha trifallax JRB310		Oxytri1|3179690	160-196:85.0 14-41:64.0 67-97:52.0 91-136:49.0	250	1.2e-13	142	0.4116	50	0.3521	14	196	110	294	Oxytri1_GeneCatalog_proteins_20191115.aa
PpSQ1_00090_SQ-dehydrogenase_Pseudomonas_putida_SQ1_1	Reticulomyxa filosa		Retfil1|260	136-201:122.0 2-50:63.0 230-256:55.0	240	3.89e-15	142	0.4116	47	0.331	2	256	75	340	Retfil1_GeneCatalog_proteins_20180531.aa
PpSQ1_00090_SQ-dehydrogenase_Pseudomonas_putida_SQ1_1	Chlamydomonas reinhardtii v4.0		Chlre4|297894	140-195:127.0 12-47:69.0 84-97:43.0 47-79:41.0	280	1.86e-16	139	0.396	57	0.4101	12	195	59	291	Chlre4_best_proteins
PpSQ1_00090_SQ-dehydrogenase_Pseudomonas_putida_SQ1_1	Phaeocystis antarctica CCMP1374 v2.2		Phaant1|13269	75-149:113.0 12-74:95.0 160-195:74.0 205-259:52.0	334	6.01e-25	229	0.3623	74	0.3231	12	259	384	631	Phaant1_GeneCatalog_proteins_20181014.aa
PpSQ1_00090_SQ-dehydrogenase_Pseudomonas_putida_SQ1_1	Symbiodinium microadriaticum CCMP2467		Symmic1|33772	87-195:164.0 13-51:89.0 227-253:60.0	313	7.67e-26	175	0.1312	65	0.3714	13	253	255	485	Symmic1_GeneCatalog_proteins_20180603.aa
Query Name	Organism	Phylogenetic affinity	Hit	Hsp	Score	EValue	Alignment Length	% Hit Coverage	Hit Identity	% Hit Identity	Query Start	Query End	Hit Start	Hit End	Dataset
PpSQ1_00091_SGL-lactonase_Pseudomonas_putida_SQ1_1	Physcomitrella patens subsp patens v1.1	Bryophyta, Plantae	Phypa1_1|106908	175-256:141.0 100-134:81.0 13-70:55.0 143-177:53.0	330	4.54e-24	210	0.6709	65	0.3095	13	256	31	277	proteins.FilterdModels3
PpSQ1_00091_SGL-lactonase_Pseudomonas_putida_SQ1_1	Pavlovales sp. CCMP2436 v1.0	Pavlovophyceae, Haptophyceae	Pavlov2436_1|589337	55-115:76.0 8-45:72.0 128-175:71.0 225-255:70.0 183-223:64.0	353	1.91e-23	219	0.6537	80	0.3653	8	255	43	298	Pavlov2436_1_GeneCatalog_proteins_20160817.aa
PpSQ1_00091_SGL-lactonase_Pseudomonas_putida_SQ1_1	Ostreococcus lucimarinus	Mamiellophyceae, Chlorophyta	Ost9901_3|41751	147-258:196.0 15-42:78.0 55-95:62.0 98-116:45.0	381	1.57e-31	200	0.6098	79	0.395	15	258	3	249	Olucimarinus_FM_aa
PpSQ1_00091_SGL-lactonase_Pseudomonas_putida_SQ1_1	Coccomyxa sp. C-169	Trebouxiophyceae, Chlorophyta	Coc_C169_1|47480	2-71:70.0 225-258:66.0 95-117:54.0 144-180:45.0 195-215:41.0	276	1.26e-13	185	0.6046	63	0.3405	2	258	4	275	Coccomyxa_C169_v2_filtered_proteins
PpSQ1_00091_SGL-lactonase_Pseudomonas_putida_SQ1_1	Thalassiosira pseudonana CCMP 1335	Bacillariophyceae, Stramenopila	Thaps3|7230	93-224:128.0 238-259:60.0	188	1.53e-13	154	0.5992	47	0.3052	93	259	65	231	Thaps3_geneModels_FilteredModels2_aa
PpSQ1_00091_SGL-lactonase_Pseudomonas_putida_SQ1_1	Picochlorum sp. SENEW3	Trebouxiophyceae, Chlorophyta	Picsp_1|3650	15-71:79.0 225-258:75.0 142-180:69.0 95-117:59.0 197-218:50.0	332	5.49e-21	175	0.5556	66	0.3771	15	258	21	281	Picsp_1_GeneCatalog_proteins_20170909.aa
PpSQ1_00091_SGL-lactonase_Pseudomonas_putida_SQ1_1	Symbiochloris reticulata Africa extracted metagenome v1.0	Trebouxiophyceae, Chlorophyta	SymretAf1|435955	15-54:82.0 225-263:77.0 139-180:62.0 195-224:50.0 95-110:46.0	317	1.86e-17	167	0.5422	62	0.3713	15	263	16	278	SymretAf1_GeneCatalog_proteins_20180322.aa
PpSQ1_00091_SGL-lactonase_Pseudomonas_putida_SQ1_1	Symbiochloris reticulata Spain reference genome v1.0	Trebouxiophyceae, Chlorophyta	Dicre1|807623	15-54:82.0 225-263:77.0 139-180:62.0 195-224:50.0 95-110:46.0	317	1.74e-17	167	0.5422	62	0.3713	15	263	16	278	Dicre1_GeneCatalog_proteins_20171101.aa
PpSQ1_00091_SGL-lactonase_Pseudomonas_putida_SQ1_1	Symbiochloris reticulata Spain extracted metagenome v1.0	Trebouxiophyceae, Chlorophyta	SymretSp1|806850	15-54:82.0 225-263:77.0 139-180:62.0 195-224:50.0 95-110:46.0	317	1.77e-17	167	0.5422	62	0.3713	15	263	16	278	SymretSp1_GeneCatalog_proteins_20171013.aa
PpSQ1_00091_SGL-lactonase_Pseudomonas_putida_SQ1_1	Symbiochloris reticulata Scotland extracted metagenome v1.0	Trebouxiophyceae, Chlorophyta	SymretSc1|213332	15-54:82.0 225-263:77.0 139-180:62.0 195-224:50.0 95-110:46.0	317	1.81e-17	167	0.5422	62	0.3713	15	263	16	278	SymretSc1_GeneCatalog_proteins_20180314.aa
PpSQ1_00091_SGL-lactonase_Pseudomonas_putida_SQ1_1	Nannochloropsis gaditana B-31	Eustigmatophyceae, Ochrophyta	Nangad1|2918	195-256:160.0 6-64:120.0 144-176:60.0 100-115:52.0	392	2.44e-31	170	0.5312	76	0.4471	6	256	10	289	Nangad1_GeneCatalog_proteins_20180307.aa
PpSQ1_00091_SGL-lactonase_Pseudomonas_putida_SQ1_1	Asterochloris sp. Cgr/DA1pho v2.0		Astpho2|3105	225-263:82.0 143-180:68.0 15-43:60.0 96-117:58.0 195-223:55.0	323	3.53e-18	157	0.4891	67	0.4268	15	263	16	286	Astpho2_GeneCatalog_proteins_20111209.aa
PpSQ1_00091_SGL-lactonase_Pseudomonas_putida_SQ1_1	Symbiochloris reticulata Switzerland extracted metagenome v1.0		SymretSw1|581203	15-54:82.0 225-263:77.0 139-180:62.0 195-224:50.0 95-110:46.0	317	3.39e-17	167	0.4704	62	0.3713	15	263	63	325	SymretSw1_GeneCatalog_proteins_20180321.aa
PpSQ1_00091_SGL-lactonase_Pseudomonas_putida_SQ1_1	Phaeodactylum tricornutum CCAP 1055/1 v2.0		Phatr2|49486	138-216:86.0 239-259:50.0 38-62:49.0 99-110:49.0 15-41:44.0	278	3.42e-12	164	0.4659	57	0.3476	15	259	41	319	Phatr2_geneModels_FilteredModels2_aa
PpSQ1_00091_SGL-lactonase_Pseudomonas_putida_SQ1_1	Ectocarpus siliculosus Ec 32		Ectsil1|17673	187-234:112.0 239-279:76.0 148-177:59.0 98-115:52.0	299	4.21e-20	137	0.4391	61	0.4453	98	279	110	299	Ectsil1_GeneCatalog_proteins_20171109.aa
PpSQ1_00091_SGL-lactonase_Pseudomonas_putida_SQ1_1	Guillardia theta CCMP2712		Guith1|139803	3-59:114.0 225-258:86.0 100-117:75.0 190-218:58.0	333	4.05e-23	138	0.4381	62	0.4493	3	258	24	283	Guith1_GeneCatalog_proteins_20101209.aa
PpSQ1_00091_SGL-lactonase_Pseudomonas_putida_SQ1_1	Chrysochromulina tobin CCMP291		Chrsp_1|171646	239-275:79.0 8-53:75.0 98-117:65.0 144-185:63.0 197-223:62.0	344	2.85e-20	172	0.4257	68	0.3953	8	275	62	354	Chrsp_1_GeneCatalog_proteins_20180813.aa
PpSQ1_00091_SGL-lactonase_Pseudomonas_putida_SQ1_1	Auxenochlorella protothecoides 0710		Auxeprot1|3219	225-258:80.0 15-58:78.0 95-117:55.0 197-224:50.0 143-178:46.0	309	3.46e-16	165	0.4209	63	0.3818	15	258	79	339	Auxeprot1_GeneCatalog_proteins_20170909.aa
PpSQ1_00091_SGL-lactonase_Pseudomonas_putida_SQ1_1	Phaeocystis antarctica CCMP1374 v2.2		Phaant1|22874	8-47:83.0 98-117:74.0 239-275:72.0 197-223:67.0 144-175:46.0	342	6.56e-20	156	0.4094	67	0.4295	8	275	64	354	Phaant1_GeneCatalog_proteins_20181014.aa
PpSQ1_00091_SGL-lactonase_Pseudomonas_putida_SQ1_1	Ostreococcus sp. RCC809		OstRCC809_2|95516	147-259:200.0 15-42:82.0 55-95:53.0 98-110:41.0	376	7.68e-31	195	0.4004	77	0.3949	15	259	190	411	OstRCC809FM3proteins
PpSQ1_00091_SGL-lactonase_Pseudomonas_putida_SQ1_1	Chlorella sp. NC64A		ChlNC64A_1|136730	15-58:97.0 225-262:74.0 95-117:55.0 197-219:49.0	275	1e-15	128	0.3975	53	0.4141	15	262	16	295	Chlorella_NC64A_filtered_proteins
PpSQ1_00091_SGL-lactonase_Pseudomonas_putida_SQ1_1	Pseudo-nitzschia multiseries CLN-47		Psemu1|225199	243-263:60.0 15-41:59.0 99-111:58.0 195-216:53.0 40-64:48.0 139-175:44.0	322	5.89e-14	145	0.3856	62	0.4276	15	263	55	348	Psemu1_GeneCatalog_proteins_20111011.aa
PpSQ1_00091_SGL-lactonase_Pseudomonas_putida_SQ1_1	Micromonas commoda NOUM17 (RCC 299)		MicpuN3v2|9513	195-226:81.0 142-177:64.0 231-255:59.0 44-72:58.0 97-116:51.0	313	1.77e-16	142	0.3777	62	0.4366	44	255	44	335	MicpuN3v2_GeneCatalog_proteins_20131216.aa
PpSQ1_00091_SGL-lactonase_Pseudomonas_putida_SQ1_1	Galdieria sulphuraria 074W		Galsul1|3810	225-258:71.0 100-117:55.0 136-175:49.0 17-40:47.0	222	5.94e-09	116	0.3483	42	0.3621	17	258	21	300	Galsul1_GeneCatalog_proteins_20180411.aa
PpSQ1_00091_SGL-lactonase_Pseudomonas_putida_SQ1_1	Fragilariopsis cylindrus CCMP 1102		Fracy1|225813	4-64:94.0 193-216:56.0 100-111:51.0 243-264:45.0	246	1.5e-11	119	0.3243	50	0.4202	4	264	40	332	Fracy1_GeneModels_FilteredModels2_aa
PpSQ1_00091_SGL-lactonase_Pseudomonas_putida_SQ1_1	Ostreococcus tauri RCC4221 v3.0		Ostta4221_3|70768	129-259:206.0 15-50:87.0 55-80:66.0 98-116:50.0	409	3.05e-35	212	0.3113	85	0.4009	15	259	358	605	Ostta4221_3_GeneCatalog_proteins_20161028.aa
PpSQ1_00091_SGL-lactonase_Pseudomonas_putida_SQ1_1	Ostreococcus tauri RCC1115 v1.0		Ostta1115_2|192150	129-259:205.0 15-50:87.0 55-80:66.0 98-116:50.0	408	4.18e-35	212	0.3113	85	0.4009	15	259	358	605	Ostta1115_2_GeneCatalog_proteins_20170131.aa
PpSQ1_00091_SGL-lactonase_Pseudomonas_putida_SQ1_1	Bathycoccus prasinos RCC1105		Batpra1|4158	147-229:124.0 15-42:82.0 230-258:64.0 55-80:60.0 98-116:46.0	376	1.04e-26	185	0.2307	75	0.4054	15	258	405	656	Batpra1_GeneCatalog_proteins_20180426.aa
PpSQ1_00091_SGL-lactonase_Pseudomonas_putida_SQ1_1	Micromonas pusilla CCMP1545		MicpuC3v2|5980	170-255:164.0 8-32:66.0	230	4.72e-18	111	0.14	45	0.4054	8	255	417	673	MicpuC3v2_GeneCatalog_proteins_20131216.aa
PpSQ1_00091_SGL-lactonase_Pseudomonas_putida_SQ1_1	Symbiodinium microadriaticum CCMP2467		Symmic1|3251	70-124:118.0 4-43:91.0 239-278:89.0 183-218:63.0 125-164:55.0	416	3.81e-31	211	0.1142	85	0.4028	4	278	209	501	Symmic1_GeneCatalog_proteins_20180603.aa
PpSQ1_00091_SGL-lactonase_Pseudomonas_putida_SQ1_1	Bigelowiella natans CCMP2755		Bigna1|80758	185-248:110.0 15-33:80.0 146-175:62.0	252	2.05e-15	113	0.0996	49	0.4336	15	248	418	630	Bigna1_filtered_proteins
Query Name	Organism	Phylogenetic affinity	Hit	Hsp	Score	EValue	Alignment Length	% Hit Coverage	Hit Identity	% Hit Identity	Query Start	Query End	Hit Start	Hit End	Dataset
PpSQ1_00094_SQG-glucosidase_Pseudomonas_putida_SQ1_1	Selaginella moellendorffii v1.0	Lycopodiopsida, Plantae	Selmo1|82321	515-596:184.0 227-338:175.0 450-510:156.0 604-649:101.0 113-155:90.0 391-418:86.0 171-215:76.0 342-385:69.0 416-440:57.0 645-675:46.0	1040	2.8e-95	517	0.8763	197	0.381	113	675	1	579	Selmo1_GeneModels_FilteredModels3_aa
PpSQ1_00094_SQG-glucosidase_Pseudomonas_putida_SQ1_1	Physcomitrella patens subsp patens v1.1	Bryophyta, Plantae	Phypa1_1|122818	171-336:217.0 515-596:193.0 450-510:168.0 392-436:138.0 602-644:101.0 110-155:96.0 342-385:91.0 649-667:43.0	1047	1.72e-104	506	0.8322	200	0.3953	110	667	2	588	proteins.FilterdModels3
PpSQ1_00094_SQG-glucosidase_Pseudomonas_putida_SQ1_1	Schizochytrium aggregatum ATCC 28209	Labyrinthulomycetes, Stramenopila	Schag1|40385	239-354:227.0 448-508:137.0 557-633:132.0 114-155:111.0 169-234:75.0 635-667:56.0 507-533:54.0 367-394:52.0 532-550:45.0 397-418:41.0	930	1.35e-80	491	0.828	185	0.3768	114	667	3	581	Schag1_GeneCatalog_proteins_20121220.aa
PpSQ1_00094_SQG-glucosidase_Pseudomonas_putida_SQ1_1	Aureococcus anophagefferens clone 1984	Pelagophyceae, Ochrophyta, Stramenopila	jgi|Auran1|10333	532-620:203.0 343-444:183.0 233-313:141.0 441-510:141.0 118-155:81.0 627-640:57.0 325-338:45.0	851	2.5e-77	408	0.7528	170	0.4167	118	640	1	542	Aureococcus_anophagefferens.proteinsFM3
PpSQ1_00094_SQG-glucosidase_Pseudomonas_putida_SQ1_1	Phytophthora capsici LT1534 v11.0	Oomycota, Stramenopila	Phyca11|35263	416-509:190.0 227-293:155.0 534-605:130.0 111-172:98.0 634-664:72.0 398-416:59.0 299-321:54.0 602-630:45.0 325-358:41.0	844	3.04e-67	431	0.7207	166	0.3852	111	664	1	598	Phyca11_filtered_proteins
PpSQ1_00094_SQG-glucosidase_Pseudomonas_putida_SQ1_1	Ostreococcus lucimarinus	Mamiellophyceae, Chlorophyta	Ost9901_3|956	397-529:312.0 532-643:270.0 227-302:169.0 111-155:96.0 298-336:66.0	913	1.18e-95	405	0.7019	176	0.4346	111	643	2	542	Olucimarinus_FM_aa
PpSQ1_00094_SQG-glucosidase_Pseudomonas_putida_SQ1_1	Aurantiochytrium limacinum ATCC MYA-1381	Thraustochytriales, Stramenopila	Aurli1|55283	242-340:227.0 448-508:154.0 572-632:134.0 114-155:90.0 515-533:63.0 635-664:59.0 367-394:55.0 425-443:52.0 397-418:50.0 532-550:42.0	926	3.58e-74	400	0.6957	174	0.435	114	664	1	575	Aurli1_GeneCatalog_proteins_20120618.aa
PpSQ1_00094_SQG-glucosidase_Pseudomonas_putida_SQ1_1	Oxytricha trifallax JRB310	Spirotrichea, Ciliophora	Oxytri1|3171128	225-338:237.0 452-510:135.0 532-613:129.0 400-447:107.0 117-155:90.0 342-388:83.0 170-216:51.0 611-632:51.0 515-530:44.0	927	7.24e-84	474	0.688	179	0.3776	117	632	93	621	Oxytri1_GeneCatalog_proteins_20191115.aa
PpSQ1_00094_SQG-glucosidase_Pseudomonas_putida_SQ1_1	Bigelowiella natans CCMP2755	Chlorarachniophyceae, Cercozoa	Bigna1|49856	417-510:193.0 251-341:169.0 117-215:132.0 399-418:85.0 546-595:71.0 368-394:59.0 342-366:53.0 515-533:49.0 532-544:46.0 651-666:42.0	899	6.69e-70	454	0.6868	184	0.4053	117	666	1	628	Bigna1_filtered_proteins
PpSQ1_00094_SQG-glucosidase_Pseudomonas_putida_SQ1_1	Thalassiosira pseudonana CCMP 1335	illariophyceae, Stramenopila	Thaps3|37127	513-596:117.0 418-493:105.0 371-411:73.0 606-638:58.0 242-262:56.0 650-664:56.0 293-333:53.0 183-215:45.0	563	1.34e-39	344	0.6798	120	0.3488	183	664	1	493	Thaps3_geneModels_FilteredModels2_aa
PpSQ1_00094_SQG-glucosidase_Pseudomonas_putida_SQ1_1	Populus trichocarpa v1.1	Magnoliophyta, Plantae	eugene3.00060348	171-336:247.0 515-605:199.0 391-436:155.0 450-510:151.0 113-155:94.0 605-634:72.0 342-385:67.0 652-667:54.0 634-645:43.0	1082	6.17e-105	509	0.5817	204	0.4008	113	667	282	859	AllJamboreeModels.named_proteins
PpSQ1_00094_SQG-glucosidase_Pseudomonas_putida_SQ1_1	Phaeocystis antarctica CCMP1374 v2.2	Prymnesiophyceae, Haptophyta	Phaant1|34627	413-511:203.0 532-597:154.0 385-412:65.0 605-638:55.0	477	7.01e-44	227	0.5806	97	0.4273	385	638	3	288	Phaant1_GeneCatalog_proteins_20181014.aa
PpSQ1_00094_SQG-glucosidase_Pseudomonas_putida_SQ1_1	Nannochloropsis gaditana B-31	Eustigmatophyceae, Ochrophyta	Nangad1|4443	546-646:263.0 437-510:153.0 342-418:149.0 229-312:140.0 113-155:97.0 652-676:75.0 425-444:57.0 172-217:43.0	977	1.05e-88	470	0.5622	195	0.4149	113	676	211	792	Nangad1_GeneCatalog_proteins_20180307.aa
PpSQ1_00094_SQG-glucosidase_Pseudomonas_putida_SQ1_1	Thalassiosira oceanica CCMP1005	illariophyceae, Stramenopila	Thaoce1|73387	550-605:75.0 515-538:65.0 604-638:54.0 650-664:43.0	237	1.32e-11	130	0.5579	48	0.3692	515	664	30	195	Thaoce1_GeneCatalog_proteins_20171026.aa
PpSQ1_00094_SQG-glucosidase_Pseudomonas_putida_SQ1_1	Nannochloropsis oceanica CCMP1779 v2.0	Eustigmatophyceae, Ochrophyta	Nanoce1779_2|667381	546-630:188.0 448-510:155.0 229-327:154.0 330-418:141.0 635-678:117.0 113-155:104.0 425-445:53.0 323-336:47.0	959	3.05e-86	458	0.5459	190	0.4148	113	678	231	838	Nanoce1779_2_GeneCatalog_proteins_20180119
PpSQ1_00094_SQG-glucosidase_Pseudomonas_putida_SQ1_1	Phytophthora cinnamomi var cinnamomi v1.0	Oomycota, Stramenopila	Phyci1|94061	416-509:180.0 227-293:155.0 534-605:127.0 113-172:91.0 634-664:78.0 388-416:60.0 299-321:55.0 602-630:47.0 325-358:42.0	835	7.21e-65	439	0.544	162	0.369	113	664	155	779	Phyci1_GeneCatalog_proteins_20120612.aa
PpSQ1_00094_SQG-glucosidase_Pseudomonas_putida_SQ1_1	Micromonas commoda NOUM17 (RCC 299)	Mamiellophyceae, Chlorophyta	MicpuN3v2|6005	527-642:236.0 447-530:187.0 388-444:161.0 113-157:94.0 254-302:79.0 232-257:58.0 171-205:56.0 298-313:52.0 325-336:43.0 371-389:43.0 650-667:43.0	1052	6.03e-93	477	0.5179	197	0.413	113	667	285	880	MicpuN3v2_GeneCatalog_proteins_20131216.aa
PpSQ1_00094_SQG-glucosidase_Pseudomonas_putida_SQ1_1	Aplanochytrium kerguelense PBS07 v1.0	Labyrinthulomycetes, Stramenopila	Aplke1|30585	242-340:226.0 448-510:135.0 124-155:79.0 574-600:61.0 602-633:60.0 515-533:59.0 532-550:49.0 425-434:47.0	716	1.46e-54	301	0.5172	130	0.4319	124	633	2	535	Aplke1_GeneCatalog_proteins_20121220.aa
PpSQ1_00094_SQG-glucosidase_Pseudomonas_putida_SQ1_1	Micromonas pusilla CCMP1545	Mamiellophyceae, Chlorophyta	MicpuC3v2|7328	532-643:249.0 444-533:215.0 388-444:140.0 111-157:101.0 253-302:87.0 298-336:80.0 171-205:55.0 232-257:51.0 371-385:48.0	1026	9.6e-98	471	0.5081	190	0.4034	111	643	304	852	MicpuC3v2_GeneCatalog_proteins_20131216.aa
PpSQ1_00094_SQG-glucosidase_Pseudomonas_putida_SQ1_1	Sorghum bicolor		Sorbi1|5035547	171-336:239.0 388-436:141.0 522-596:120.0 113-155:87.0 342-389:74.0 605-632:68.0	729	6.11e-64	409	0.48	145	0.3545	113	632	315	796	Sorbi1_GeneModels_Sbi1_4_aa
PpSQ1_00094_SQG-glucosidase_Pseudomonas_putida_SQ1_1	Phytophthora infestans T30-4		Phyinf1|9598	227-293:161.0 534-605:128.0 472-510:105.0 115-172:84.0 299-324:59.0 388-412:57.0	594	9.32e-47	287	0.4736	115	0.4007	115	605	68	583	Phyinf1_GeneCatalog_proteins_20180122.aa
PpSQ1_00094_SQG-glucosidase_Pseudomonas_putida_SQ1_1	Bathycoccus prasinos RCC1105		Batpra1|599	394-530:271.0 532-641:213.0 236-302:131.0 113-157:86.0 298-336:73.0 171-207:52.0 650-667:42.0	868	3.2e-78	453	0.4651	169	0.3731	113	667	362	933	Batpra1_GeneCatalog_proteins_20180426.aa
PpSQ1_00094_SQG-glucosidase_Pseudomonas_putida_SQ1_1	Phaeocystis globosa Pg-G v2.3		Phaglo1|5789	413-511:196.0 532-597:144.0 385-412:65.0 605-661:64.0	469	9.07e-43	250	0.4554	100	0.4	385	661	155	467	Phaglo1_GeneCatalog_proteins_20181013.aa
PpSQ1_00094_SQG-glucosidase_Pseudomonas_putida_SQ1_1	Ochromonadaceae sp. CCMP2298 v1.0		Ochro2298_1|445970	372-439:165.0 448-508:154.0 546-617:150.0 280-341:144.0 171-262:126.0 109-155:99.0 627-648:66.0 650-664:42.0	946	7.37e-84	439	0.4521	178	0.4055	109	664	152	869	Ochro2298_1_GeneCatalog_proteins_20160817.aa
PpSQ1_00094_SQG-glucosidase_Pseudomonas_putida_SQ1_1	Ostreococcus tauri RCC1115 v1.0		Ostta1115_2|205225	397-529:333.0 532-643:223.0 232-302:150.0 113-155:91.0 298-336:65.0 371-389:43.0	905	2.06e-88	417	0.4494	174	0.4173	113	643	313	851	Ostta1115_2_GeneCatalog_proteins_20170131.aa
PpSQ1_00094_SQG-glucosidase_Pseudomonas_putida_SQ1_1	Phytophthora sojae v3.0		Physo3|531884	227-293:170.0 527-587:118.0 472-510:100.0 115-172:92.0 635-664:81.0 388-412:61.0 299-323:56.0 602-630:46.0 417-433:44.0	768	5.59e-56	351	0.4471	147	0.4188	115	664	167	757	Physo3_GeneCatalog_proteins_20110401.aa
PpSQ1_00094_SQG-glucosidase_Pseudomonas_putida_SQ1_1	Ostreococcus tauri RCC4221 v3.0		Ostta4221_3|76186	397-529:333.0 532-643:223.0 232-302:150.0 113-155:91.0 298-336:65.0 371-389:43.0	905	2.13e-88	417	0.4465	174	0.4173	113	643	319	857	Ostta4221_3_GeneCatalog_proteins_20161028.aa
PpSQ1_00094_SQG-glucosidase_Pseudomonas_putida_SQ1_1	Ostreococcus sp. RCC809		OstRCC809_2|94920	388-530:323.0 532-643:240.0 232-302:149.0 113-155:93.0 298-336:65.0	870	7.85e-89	408	0.4331	166	0.4069	113	643	327	865	OstRCC809FM3proteins
PpSQ1_00094_SQG-glucosidase_Pseudomonas_putida_SQ1_1	Reticulomyxa filosa		Retfil1|22421	457-510:126.0 360-415:117.0 297-338:114.0 131-189:94.0 532-570:72.0 602-638:67.0 242-263:64.0 635-644:44.0	698	5.96e-51	319	0.4181	132	0.4138	131	644	197	755	Retfil1_GeneCatalog_proteins_20180531.aa
PpSQ1_00094_SQG-glucosidase_Pseudomonas_putida_SQ1_1	Porphyra umbilicalis isolate 4086291		Porumb1|6374	453-534:103.0 602-632:61.0 301-335:46.0 638-666:44.0	254	1.26e-10	177	0.2748	62	0.3503	301	666	249	644	Porumb1_GeneCatalog_proteins_20180417.aa
PpSQ1_00094_SQG-glucosidase_Pseudomonas_putida_SQ1_1	Galdieria sulphuraria 074W		Galsul1|15	548-667:125.0 227-252:55.0 511-538:54.0 306-347:50.0	284	1.56e-14	216	0.2618	64	0.2963	227	667	258	710	Galsul1_GeneCatalog_proteins_20180411.aa
PpSQ1_00094_SQG-glucosidase_Pseudomonas_putida_SQ1_1	Emiliania huxleyi CCMP1516 v1.0		Emihu1|461465	517-630:145.0 306-360:61.0 373-388:54.0 632-668:52.0 128-146:51.0	363	1.48e-19	241	0.2614	79	0.3278	128	668	157	799	Emihu1_reduced_proteins
PpSQ1_00094_SQG-glucosidase_Pseudomonas_putida_SQ1_1	Chondrus crispus Stackhouse		Chocri1|9721	570-632:117.0 453-496:66.0 301-358:60.0 517-534:43.0	286	6e-15	183	0.2592	58	0.3169	301	632	350	666	Chocri1_GeneCatalog_proteins_20180417.aa
PpSQ1_00094_SQG-glucosidase_Pseudomonas_putida_SQ1_1	Dunaliella salina CCAP19-18		Dunsal1|8653	555-635:110.0 518-536:54.0	164	6.74e-10	100	0.2347	33	0.33	518	635	120	237	Dunsal1_GeneCatalog_proteins_20180508.aa
PpSQ1_00094_SQG-glucosidase_Pseudomonas_putida_SQ1_1	Picochlorum sp. SENEW3		Picsp_1|6834	558-632:108.0 470-534:76.0 301-351:69.0	253	2.7e-15	191	0.2279	54	0.2827	301	632	451	798	Picsp_1_GeneCatalog_proteins_20170909.aa
PpSQ1_00094_SQG-glucosidase_Pseudomonas_putida_SQ1_1	Coccomyxa sp. C-169		Coc_C169_1|64142	571-632:113.0 470-534:87.0 301-355:63.0	263	1.37e-16	182	0.2278	55	0.3022	301	632	425	751	Coccomyxa_C169_v2_filtered_proteins
PpSQ1_00094_SQG-glucosidase_Pseudomonas_putida_SQ1_1	Symbiochloris reticulata Africa extracted metagenome v1.0		SymretAf1|601853	516-648:162.0 482-507:41.0	203	1.85e-15	159	0.2065	49	0.3082	482	648	554	716	SymretAf1_GeneCatalog_proteins_20180322.aa
PpSQ1_00094_SQG-glucosidase_Pseudomonas_putida_SQ1_1	Symbiochloris reticulata Spain extracted metagenome v1.0		SymretSp1|730215	516-648:162.0 482-507:41.0	203	1.76e-15	159	0.2038	49	0.3082	482	648	564	726	SymretSp1_GeneCatalog_proteins_20171013.aa
PpSQ1_00094_SQG-glucosidase_Pseudomonas_putida_SQ1_1	Symbiochloris reticulata Spain reference genome v1.0		Dicre1|741998	516-648:162.0 482-507:41.0	203	1.73e-15	159	0.2038	49	0.3082	482	648	564	726	Dicre1_GeneCatalog_proteins_20171101.aa
PpSQ1_00094_SQG-glucosidase_Pseudomonas_putida_SQ1_1	Symbiochloris reticulata Scotland extracted metagenome v1.0		SymretSc1|244103	516-648:162.0 482-507:41.0	203	1.81e-15	159	0.2	49	0.3082	482	648	579	741	SymretSc1_GeneCatalog_proteins_20180314.aa
PpSQ1_00094_SQG-glucosidase_Pseudomonas_putida_SQ1_1	Phaeodactylum tricornutum CCAP 1055/1 v2.0		Phatr2|50836	569-635:132.0 306-348:59.0 517-536:53.0	244	4.37e-14	130	0.1826	43	0.3308	306	635	216	552	Phatr2_geneModels_FilteredModels2_aa
PpSQ1_00094_SQG-glucosidase_Pseudomonas_putida_SQ1_1	Volvox carteri nagariensis		Volca1|60238	517-635:160.0 306-348:47.0	207	4.92e-14	162	0.1804	45	0.2778	306	635	381	720	proteins
PpSQ1_00094_SQG-glucosidase_Pseudomonas_putida_SQ1_1	Chlamydomonas reinhardtii v4.0		Chlre4|128630	517-635:135.0 306-348:47.0	182	1.21e-10	162	0.1794	39	0.2407	306	635	382	717	Chlre4_best_proteins
PpSQ1_00094_SQG-glucosidase_Pseudomonas_putida_SQ1_1	Tetrahymena thermophila SB210		Tetthe1|3313937	518-623:109.0 304-350:52.0	161	1.69e-07	153	0.1787	38	0.2484	304	623	347	681	Tetthe1_GeneCatalog_proteins_20191114.aa
PpSQ1_00094_SQG-glucosidase_Pseudomonas_putida_SQ1_1	Symbiochloris reticulata Switzerland extracted metagenome v1.0		SymretSw1|436449	546-648:119.0 516-540:48.0 482-507:41.0	208	4.8e-12	154	0.178	49	0.3182	482	648	548	709	SymretSw1_GeneCatalog_proteins_20180321.aa
PpSQ1_00094_SQG-glucosidase_Pseudomonas_putida_SQ1_1	Trypanosoma brucei brucei TREU927		Trybru1|3776	569-642:103.0 518-536:70.0 306-348:53.0	226	1.36e-11	136	0.1685	44	0.3235	306	642	293	642	Trybru1_GeneCatalog_proteins_20180531.aa
PpSQ1_00094_SQG-glucosidase_Pseudomonas_putida_SQ1_1	Monoraphidium neglectum SAG 48.87		Monneg1|3076	304-352:90.0 604-654:72.0 562-600:69.0	231	4.58e-12	139	0.1551	51	0.3669	304	654	406	763	Monneg1_GeneCatalog_proteins_20170920.aa
PpSQ1_00094_SQG-glucosidase_Pseudomonas_putida_SQ1_1	Fragilariopsis cylindrus CCMP 1102		Fracy1|180330	517-635:159.0	159	6.4e-14	119	0.1532	33	0.2773	517	635	480	598	Fracy1_GeneModels_FilteredModels2_aa
PpSQ1_00094_SQG-glucosidase_Pseudomonas_putida_SQ1_1	Chrysochromulina tobin CCMP291		Chrsp_1|172151	517-630:134.0 632-667:54.0	188	3.5e-13	150	0.1494	45	0.3	517	667	709	861	Chrsp_1_GeneCatalog_proteins_20180813.aa
PpSQ1_00094_SQG-glucosidase_Pseudomonas_putida_SQ1_1	Arabidopsis lyrata		Araly1|919683	569-667:160.0 518-536:42.0 490-507:41.0	243	2.36e-16	136	0.1477	47	0.3456	490	667	604	777	Araly1_GeneModels_FilteredModels6_aa
PpSQ1_00094_SQG-glucosidase_Pseudomonas_putida_SQ1_1	Raphidocelis subcapitata NIES-35		Rapsub1|8124	569-635:101.0 518-536:43.0 438-477:42.0	186	6.54e-09	126	0.1382	39	0.3095	438	635	526	716	Rapsub1_GeneCatalog_proteins_20191119.aa
PpSQ1_00094_SQG-glucosidase_Pseudomonas_putida_SQ1_1	Gonium pectorale NIES-2863		Gonpec1|830	567-666:133.0 517-536:51.0	184	1.3e-12	120	0.1333	36	0.3	517	666	602	751	Gonpec1_GeneCatalog_proteins_20180501.aa
PpSQ1_00094_SQG-glucosidase_Pseudomonas_putida_SQ1_1	Chromochloris zofingiensis SAG 211-14		Chrzof1|1031	543-638:110.0 634-661:52.0 518-536:41.0	203	3.49e-11	143	0.1328	46	0.3217	518	661	647	788	Chrzof1_GeneCatalog_proteins_20190731.aa
PpSQ1_00094_SQG-glucosidase_Pseudomonas_putida_SQ1_1	Cyanidioschyzon merolae strain 10D		Cyamer1|56021	602-632:94.0 298-352:79.0 471-496:50.0	223	2.43e-11	112	0.1247	45	0.4018	298	632	447	787	Cyamer1_GeneCatalog_proteins_20180616.aa
PpSQ1_00094_SQG-glucosidase_Pseudomonas_putida_SQ1_1	Naegleria gruberi v1.0		Naegr1|83164	569-632:119.0 518-536:47.0 468-494:42.0	208	8.02e-12	110	0.1225	42	0.3818	468	632	553	710	Naegr1_best_proteins
PpSQ1_00094_SQG-glucosidase_Pseudomonas_putida_SQ1_1	Trichomonas vaginalis G3		Trivag1|41994	567-645:104.0 482-507:49.0	153	2.02e-06	105	0.1212	36	0.3429	482	645	554	715	Trivag1_GeneCatalog_proteins_20180531.aa
PpSQ1_00094_SQG-glucosidase_Pseudomonas_putida_SQ1_1	Auxenochlorella protothecoides 0710		Auxeprot1|142	569-642:105.0 516-536:53.0 480-507:47.0	205	7.03e-12	123	0.1137	44	0.3577	480	642	522	679	Auxeprot1_GeneCatalog_proteins_20170909.aa
PpSQ1_00094_SQG-glucosidase_Pseudomonas_putida_SQ1_1	Saprolegnia parasitica CBS 223.65		Sappar1|23727	569-635:155.0 517-536:51.0 648-667:44.0	250	2.03e-17	107	0.1107	46	0.4299	517	667	679	831	Sappar1_GeneCatalog_proteins_20180131.aa
PpSQ1_00094_SQG-glucosidase_Pseudomonas_putida_SQ1_1	Pelagophyceae sp. CCMP2097 v1.0		Pelago2097_1|550762	569-630:130.0 517-536:60.0 644-667:47.0	237	1.07e-15	106	0.1086	47	0.4434	517	667	677	831	Pelago2097_1_GeneCatalog_proteins_20160408.aa
PpSQ1_00094_SQG-glucosidase_Pseudomonas_putida_SQ1_1	Scenedesmus obliquus EN0004 v1.0		SceoblEN4_1|344460	569-646:127.0 517-536:51.0	178	6.97e-12	98	0.1078	33	0.3367	517	646	606	735	SceoblEN4_1_GeneCatalog_proteins_20190921.aa
PpSQ1_00094_SQG-glucosidase_Pseudomonas_putida_SQ1_1	Scenedesmus obliquus UTEX 393		Sobl393_1|6935	569-646:127.0 517-536:51.0	178	8.6e-12	98	0.1078	33	0.3367	517	646	606	735	Sobl393_1_GeneCatalog_proteins_20200120.aa
PpSQ1_00094_SQG-glucosidase_Pseudomonas_putida_SQ1_1	Pseudo-nitzschia multiseries CLN-47		Psemu1|218514	569-635:112.0 517-536:47.0	159	2.92e-09	87	0.1078	30	0.3448	517	635	510	628	Psemu1_GeneCatalog_proteins_20111011.aa
PpSQ1_00094_SQG-glucosidase_Pseudomonas_putida_SQ1_1	Guillardia theta CCMP2712		Guith1|159678	569-631:107.0 518-536:51.0	158	5.5e-09	82	0.0973	31	0.378	518	631	527	640	Guith1_GeneCatalog_proteins_20101209.aa
PpSQ1_00094_SQG-glucosidase_Pseudomonas_putida_SQ1_1	Asterochloris sp. Cgr/DA1pho v2.0		Astpho2|6591	569-635:135.0 518-536:49.0	184	7.07e-13	86	0.0954	35	0.407	518	635	610	727	Astpho2_GeneCatalog_proteins_20111209.aa
PpSQ1_00094_SQG-glucosidase_Pseudomonas_putida_SQ1_1	Chlorella sp. NC64A		ChlNC64A_1|57649	569-602:66.0 605-648:66.0 516-536:51.0	183	9.25e-09	99	0.0709	37	0.3737	516	648	672	808	Chlorella_NC64A_filtered_proteins
Query Name	Organism	Phylogenetic affinity	Hit	Hsp	Score	EValue	Alignment Length	% Hit Coverage	Hit Identity	% Hit Identity	Query Start	Query End	Hit Start	Hit End	Dataset
PpSQ1_00095_Na-symporter_Pseudomonas_putida_SQ1_1	Guillardia theta CCMP2712	Cryptophyta, Stramenopila	Guith1|73946	31-149:155.0 240-293:118.0	273	2.79e-24	173	0.6007	55	0.3179	31	293	34	284	Guith1_GeneCatalog_proteins_20101209.aa
PpSQ1_00095_Na-symporter_Pseudomonas_putida_SQ1_1	Schizochytrium aggregatum ATCC 28209	Labyrinthulomycetes, Stramenopila	Schag1|33451	37-150:155.0 240-305:109.0 318-382:103.0 169-192:47.0	414	1.86e-33	269	0.5163	87	0.3234	37	382	58	404	Schag1_GeneCatalog_proteins_20121220.aa
PpSQ1_00095_Na-symporter_Pseudomonas_putida_SQ1_1	Aplanochytrium kerguelense PBS07 v1.0		Aplke1|61158	37-157:173.0 241-318:134.0 318-382:101.0 177-192:45.0	453	1.58e-38	280	0.4308	90	0.3214	37	382	56	398	Aplke1_GeneCatalog_proteins_20121220.aa
PpSQ1_00095_Na-symporter_Pseudomonas_putida_SQ1_1	Phytophthora capsici LT1534 v11.0		Phyca11|506241|fgenesh2_kg.PHYCAscaffold_18_#_114_#_gi|189084747	37-177:180.0 245-305:115.0 317-382:99.0	394	1.73e-35	268	0.4241	81	0.3022	37	382	120	456	Phyca11_filtered_proteins
PpSQ1_00095_Na-symporter_Pseudomonas_putida_SQ1_1	Phytophthora infestans T30-4		Phyinf1|9207	37-177:180.0 245-305:114.0 317-382:91.0	385	3.85e-34	268	0.4241	80	0.2985	37	382	120	456	Phyinf1_GeneCatalog_proteins_20180122.aa
PpSQ1_00095_Na-symporter_Pseudomonas_putida_SQ1_1	Phytophthora sojae v3.0		Physo3|294930	37-177:176.0 245-305:114.0 317-382:100.0	390	1.06e-34	268	0.4174	80	0.2985	37	382	130	466	Physo3_GeneCatalog_proteins_20110401.aa
PpSQ1_00095_Na-symporter_Pseudomonas_putida_SQ1_1	Phytophthora cinnamomi var cinnamomi v1.0		Phyci1|92399	37-177:176.0 245-305:114.0 317-382:99.0	389	1.53e-34	268	0.3862	80	0.2985	37	382	182	518	Phyci1_GeneCatalog_proteins_20120612.aa
PpSQ1_00095_Na-symporter_Pseudomonas_putida_SQ1_1	Emiliania huxleyi CCMP1516 v1.0		Emihu1|107727	37-151:154.0 240-295:102.0 320-376:65.0 174-192:49.0	370	8.78e-27	247	0.3859	78	0.3158	37	376	45	377	Emihu1_reduced_proteins
PpSQ1_00095_Na-symporter_Pseudomonas_putida_SQ1_1	Phaeocystis antarctica CCMP1374 v2.2		Phaant1|39833	37-151:164.0 245-290:89.0 320-376:64.0 165-192:56.0	373	4.96e-27	246	0.3576	79	0.3211	37	376	56	360	Phaant1_GeneCatalog_proteins_20181014.aa
PpSQ1_00095_Na-symporter_Pseudomonas_putida_SQ1_1	Aurantiochytrium limacinum ATCC MYA-1381		Aurli1|134233	24-150:168.0 240-303:117.0 318-382:97.0	382	1.19e-33	256	0.3551	79	0.3086	24	382	69	425	Aurli1_GeneCatalog_proteins_20120618.aa
PpSQ1_00095_Na-symporter_Pseudomonas_putida_SQ1_1	Naegleria gruberi v1.0		Naegr1|69560	37-147:177.0 245-305:147.0 318-369:92.0 154-174:47.0	463	1.44e-39	245	0.3375	90	0.3673	37	369	132	449	Naegr1_best_proteins
PpSQ1_00095_Na-symporter_Pseudomonas_putida_SQ1_1	Phaeocystis globosa Pg-G v2.3		Phaglo1|19846	245-366:184.0 37-151:169.0 177-192:47.0	400	9.47e-36	253	0.3147	84	0.332	37	366	72	433	Phaglo1_GeneCatalog_proteins_20181013.aa
PpSQ1_00095_Na-symporter_Pseudomonas_putida_SQ1_1	Porphyra umbilicalis isolate 4086291		Porumb1|4474	277-365:134.0 89-177:96.0 245-276:75.0	305	4.56e-23	210	0.3079	65	0.3095	89	365	128	401	Porumb1_GeneCatalog_proteins_20180417.aa
PpSQ1_00095_Na-symporter_Pseudomonas_putida_SQ1_1	Ochromonadaceae sp. CCMP2298 v1.0		Ochro2298_1|431974	251-306:83.0 316-366:82.0	165	2.65e-09	107	0.3014	35	0.3271	251	366	30	231	Ochro2298_1_GeneCatalog_proteins_20160817.aa
PpSQ1_00095_Na-symporter_Pseudomonas_putida_SQ1_1	Cyanidioschyzon merolae strain 10D		Cyamer1|54990	245-309:145.0 315-364:98.0 89-145:88.0 174-188:41.0	372	1.29e-27	187	0.2783	76	0.4064	89	364	108	376	Cyamer1_GeneCatalog_proteins_20180616.aa
PpSQ1_00095_Na-symporter_Pseudomonas_putida_SQ1_1	Symbiodinium microadriaticum CCMP2467		Symmic1|13924	222-310:173.0 74-181:169.0 316-366:134.0 404-451:44.0 470-510:42.0 34-91:104.0 173-192:72.0	738	5.56e-52	415	0.2427	155	0.3735	34	510	1143	1619	Symmic1_GeneCatalog_proteins_20180603.aa
Query Name	Organism	Phylogenetic affinity	Hit	Hsp	Score	EValue	Alignment Length	% Hit Coverage	Hit Identity	% Hit Identity	Query Start	Query End	Hit Start	Hit End	Dataset
PpSQ1_00096_transcriptional_regulator_Pseudomonas_putida_SQ1_1	Ostreococcus tauri RCC1115 v1.0	Mamiellophyceae, Chlorophyta	Ostta1115_2|201029	245-326:120.0 18-114:107.0	227	7.96e-18	179	0.5129	59	0.3296	18	326	10	322	Ostta1115_2_GeneCatalog_proteins_20170131.aa
PpSQ1_00096_transcriptional_regulator_Pseudomonas_putida_SQ1_1	Populus trichocarpa v1.1		eugene3.197020001	23-89:136.0	136	1.72e-10	67	0.3526	33	0.4925	23	89	108	174	AllJamboreeModels.named_proteins
Query Name	Organism		Hit	Hsp	Score	EValue	Alignment Length	% Hit Coverage	Hit Identity	% Hit Identity	Query Start	Query End	Hit Start	Hit End	Dataset
PpSQ1_00100_2-dehydro-3,6-dideoxy-6-sulfogluconate-aldolase	Physcomitrella patens subsp patens v1.1	Bryophyta, Plantae	Phypa1_1|118855	22-124:217.0 128-231:140.0	357	3.21e-36	207	0.8182	78	0.3768	22	231	18	228	proteins.FilterdModels3
PpSQ1_00100_2-dehydro-3,6-dideoxy-6-sulfogluconate-aldolase	Populus trichocarpa v1.1	Magnoliophyta, Plantae	grail3.2946000201	21-230:444.0	444	2.47e-53	210	0.8046	86	0.4095	21	230	26	235	AllJamboreeModels.named_proteins
PpSQ1_00100_2-dehydro-3,6-dideoxy-6-sulfogluconate-aldolase	Fragilariopsis cylindrus CCMP 1102	Bacillariophyceae, Stramenopila	Fracy1|161324	140-195:86.0 84-124:81.0 34-76:51.0	218	2.59e-13	140	0.7692	47	0.3357	34	195	1	177	Fracy1_GeneModels_FilteredModels2_aa
PpSQ1_00100_2-dehydro-3,6-dideoxy-6-sulfogluconate-aldolase	Phaeodactylum tricornutum CCAP 1055/1 v2.0	Bacillariophyceae, Stramenopila	Phatr2|5419	129-202:150.0 33-68:66.0 70-89:61.0 95-125:54.0	331	1.6e-24	161	0.7523	69	0.4286	33	202	1	169	Phatr2_geneModels_FilteredModels2_aa
PpSQ1_00100_2-dehydro-3,6-dideoxy-6-sulfogluconate-aldolase	Nannochloropsis gaditana B-31	Eustigmatophyceae, Ochrophyta	Nangad1|3770	69-123:109.0 13-50:69.0	178	3.05e-12	93	0.7045	35	0.3763	13	123	13	124	Nangad1_GeneCatalog_proteins_20180307.aa
PpSQ1_00100_2-dehydro-3,6-dideoxy-6-sulfogluconate-aldolase	Bigelowiella natans CCMP2755	Chlorarachniophyceae, Cercozoa	Bigna1|129037	136-230:128.0 56-132:83.0 38-52:48.0	259	1.13e-18	187	0.6926	60	0.3209	38	230	35	230	Bigna1_filtered_proteins
PpSQ1_00100_2-dehydro-3,6-dideoxy-6-sulfogluconate-aldolase	Phaeocystis antarctica CCMP1374 v2.2	Prymnesiophyceae, Haptophyta	Phaant1|24295	138-230:193.0 78-132:144.0 40-76:75.0	412	3.22e-39	185	0.6357	80	0.4324	40	230	66	261	Phaant1_GeneCatalog_proteins_20181014.aa
PpSQ1_00100_2-dehydro-3,6-dideoxy-6-sulfogluconate-aldolase	Aureococcus anophagefferens clone 1984	Pelagophyceae, Ochrophyta, Stramenopila	jgi|Auran1|29953	132-181:111.0 14-80:109.0 79-119:82.0	302	1.21e-24	158	0.5918	65	0.4114	14	181	1	178	Aureococcus_anophagefferens.proteinsFM3
PpSQ1_00100_2-dehydro-3,6-dideoxy-6-sulfogluconate-aldolase	Pseudo-nitzschia multiseries CLN-47	Bacillariophyceae, Stramenopila	Psemu1|105701	152-202:89.0 84-124:80.0 34-50:48.0	217	1.59e-12	109	0.5648	43	0.3945	34	202	1	187	Psemu1_GeneCatalog_proteins_20111011.aa
PpSQ1_00100_2-dehydro-3,6-dideoxy-6-sulfogluconate-aldolase	Nannochloropsis oceanica CCMP1779 v2.0	Eustigmatophyceae, Ochrophyta	Nanoce1779_2|674176	69-137:112.0 138-185:107.0 13-54:81.0	300	1.66e-24	159	0.5638	62	0.3899	13	185	13	183	Nanoce1779_2_GeneCatalog_proteins_20180119
PpSQ1_00100_2-dehydro-3,6-dideoxy-6-sulfogluconate-aldolase	Monoraphidium neglectum SAG 48.87	Chlorophyceae, Chlorophyta	Monneg1|4733	19-80:106.0 84-129:99.0 138-185:97.0	302	1.12e-24	156	0.5436	65	0.4167	19	185	37	209	Monneg1_GeneCatalog_proteins_20170920.aa
PpSQ1_00100_2-dehydro-3,6-dideoxy-6-sulfogluconate-aldolase	Gonium pectorale NIES-2863	Chlorophyceae, Chlorophyta	Gonpec1|6920	84-129:98.0 36-76:83.0 164-186:70.0	251	6.38e-17	110	0.5314	48	0.4364	36	186	2	160	Gonpec1_GeneCatalog_proteins_20180501.aa
PpSQ1_00100_2-dehydro-3,6-dideoxy-6-sulfogluconate-aldolase	Sorghum bicolor	Magnoliophyta, Plantae	Sorbi1|5034175	22-124:179.0 128-202:143.0	322	2.19e-31	178	0.5145	68	0.382	22	202	74	255	Sorbi1_GeneModels_Sbi1_4_aa
PpSQ1_00100_2-dehydro-3,6-dideoxy-6-sulfogluconate-aldolase	Pavlovales sp. CCMP2436 v1.0	Pavlovophyceae, Haptophyceae	Pavlov2436_1|835689	138-185:134.0 70-123:104.0	238	3.22e-20	102	0.5126	48	0.4706	70	185	65	177	Pavlov2436_1_GeneCatalog_proteins_20160817.aa
PpSQ1_00100_2-dehydro-3,6-dideoxy-6-sulfogluconate-aldolase	Raphidocelis subcapitata NIES-35		Rapsub1|6225	18-80:114.0 79-129:95.0 138-185:91.0	300	2.79e-24	162	0.5047	64	0.3951	18	185	60	233	Rapsub1_GeneCatalog_proteins_20191119.aa
PpSQ1_00100_2-dehydro-3,6-dideoxy-6-sulfogluconate-aldolase	Arabidopsis lyrata	Magnoliophyta, Plantae	Araly1|911383	22-124:192.0 126-202:136.0	328	2.72e-32	180	0.5028	67	0.3722	22	202	92	273	Araly1_GeneModels_FilteredModels6_aa
PpSQ1_00100_2-dehydro-3,6-dideoxy-6-sulfogluconate-aldolase	Thalassiosira oceanica CCMP1005		Thaoce1|102326	128-202:141.0 95-116:61.0 71-89:47.0	249	3.06e-17	116	0.4936	52	0.4483	71	202	33	176	Thaoce1_GeneCatalog_proteins_20171026.aa
PpSQ1_00100_2-dehydro-3,6-dideoxy-6-sulfogluconate-aldolase	Chromochloris zofingiensis SAG 211-14		Chrzof1|5015	18-76:106.0	106	8.31e-07	59	0.4836	23	0.3898	18	76	50	108	Chrzof1_GeneCatalog_proteins_20190731.aa
PpSQ1_00100_2-dehydro-3,6-dideoxy-6-sulfogluconate-aldolase	Scenedesmus obliquus EN0004 v1.0		SceoblEN4_1|618892	79-129:102.0 138-180:91.0 18-76:86.0	279	1.64e-21	153	0.4665	63	0.4118	18	180	60	228	SceoblEN4_1_GeneCatalog_proteins_20190921.aa
PpSQ1_00100_2-dehydro-3,6-dideoxy-6-sulfogluconate-aldolase	Chrysochromulina tobin CCMP291		Chrsp_1|183720	78-132:151.0 136-174:74.0 190-230:64.0 43-69:57.0	346	2.64e-26	162	0.4438	68	0.4198	43	230	163	341	Chrsp_1_GeneCatalog_proteins_20180813.aa
PpSQ1_00100_2-dehydro-3,6-dideoxy-6-sulfogluconate-aldolase	Phaeocystis globosa Pg-G v2.3		Phaglo1|28297	140-185:103.0 78-119:85.0 21-76:76.0	264	3.42e-19	144	0.4417	56	0.3889	21	185	70	245	Phaglo1_GeneCatalog_proteins_20181013.aa
PpSQ1_00100_2-dehydro-3,6-dideoxy-6-sulfogluconate-aldolase	Emiliania huxleyi CCMP1516 v1.0		Emihu1|117636	73-123:87.0 156-186:71.0 19-50:59.0	217	5.22e-13	114	0.4385	39	0.3421	19	186	38	201	Emihu1_reduced_proteins
PpSQ1_00100_2-dehydro-3,6-dideoxy-6-sulfogluconate-aldolase	Pelagophyceae sp. CCMP2097 v1.0		Pelago2097_1|617565	142-184:87.0 84-123:77.0 24-50:50.0	214	9.5e-13	110	0.4365	42	0.3818	24	184	7	172	Pelago2097_1_GeneCatalog_proteins_20160408.aa
PpSQ1_00100_2-dehydro-3,6-dideoxy-6-sulfogluconate-aldolase	Chlorella sp. NC64A		ChlNC64A_1|134309	21-76:107.0 84-116:71.0 161-185:63.0 138-162:48.0	289	2.36e-17	139	0.3592	61	0.4388	21	185	62	274	Chlorella_NC64A_filtered_proteins
PpSQ1_00100_2-dehydro-3,6-dideoxy-6-sulfogluconate-aldolase	Chlamydomonas reinhardtii v4.0		Chlre4|405680	84-129:98.0 18-81:95.0 166-190:75.0	268	1.39e-18	135	0.3525	54	0.4	18	190	99	281	Chlre4_best_proteins
PpSQ1_00100_2-dehydro-3,6-dideoxy-6-sulfogluconate-aldolase	Symbiodinium microadriaticum CCMP2467		Symmic1|8800	137-185:105.0	105	5.13e-06	49	0.2462	23	0.4694	137	185	59	107	Symmic1_GeneCatalog_proteins_20180603.aa
